# Supplementary material for: Two Chromogranin A-Derived Peptides Induce Calcium Entry in Human Neutrophils by Calmodulin-Regulated Calcium Independent Phospholipase A2
Source: PubMed Central journal article supplement (PMC2639705; doi:10.1371/journal.pone.0004501), 2009-02-19
Supplement: pone.0004501.s002.pdf [file pone.0004501.s002.pdf]

## Supplementary data

Spectrum from the protein identified with a unique peptide.

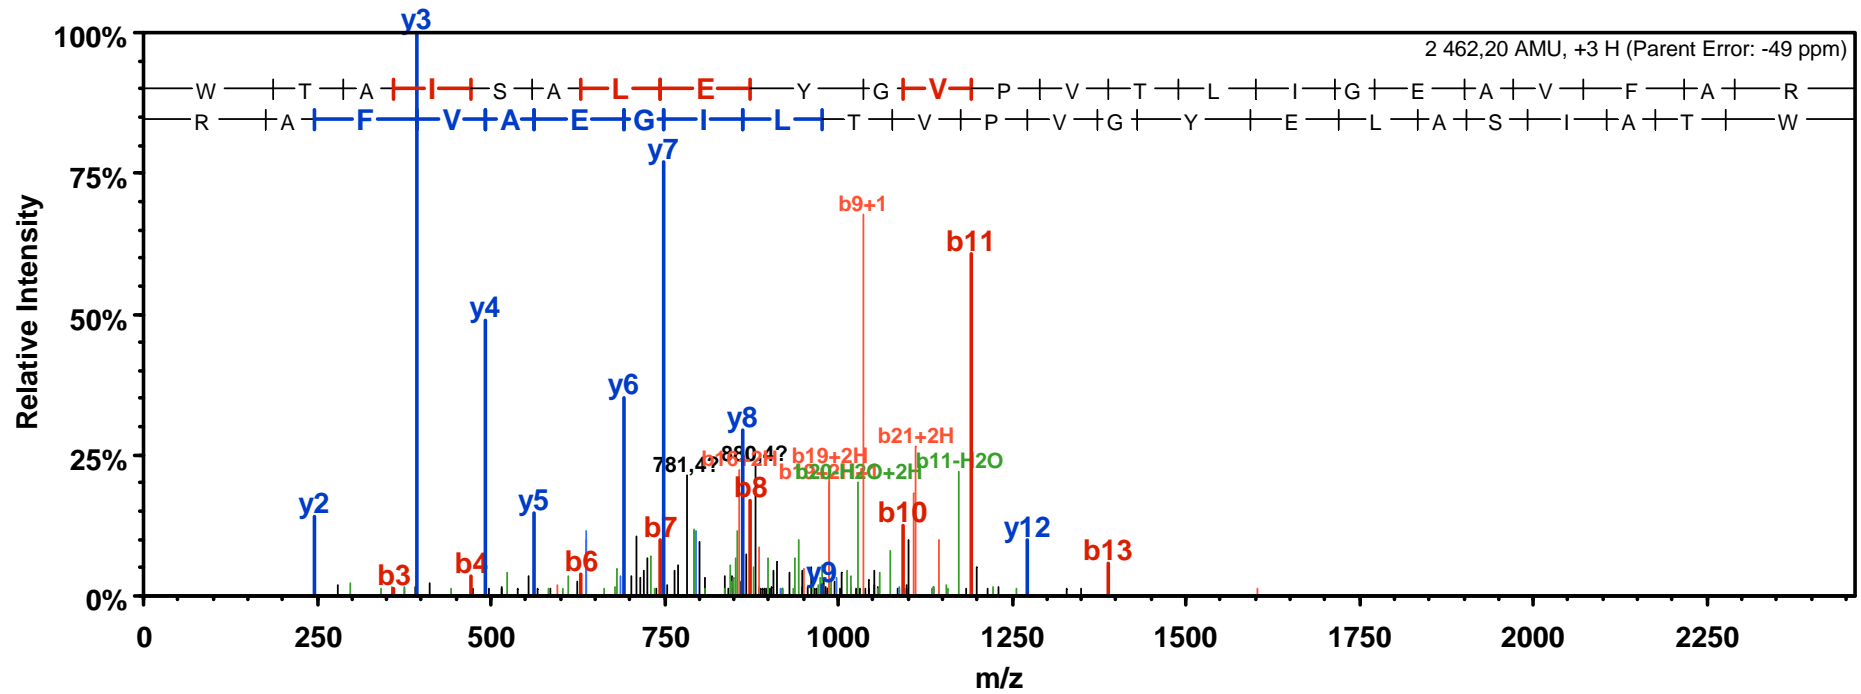

| Biological sample name | MS/MS sample name | Protein name                                                             | Peptide sequence            | Mascot Ion score |
|------------------------|-------------------|--------------------------------------------------------------------------|-----------------------------|------------------|
| Chromofungin_20        | F011551 (F013456) | 6-phosphogluconate dehydrogenase, decarboxylating - Homo sapiens (Human) | WTAISALEYGV PVT LIG EAV FAR | 67,7             |

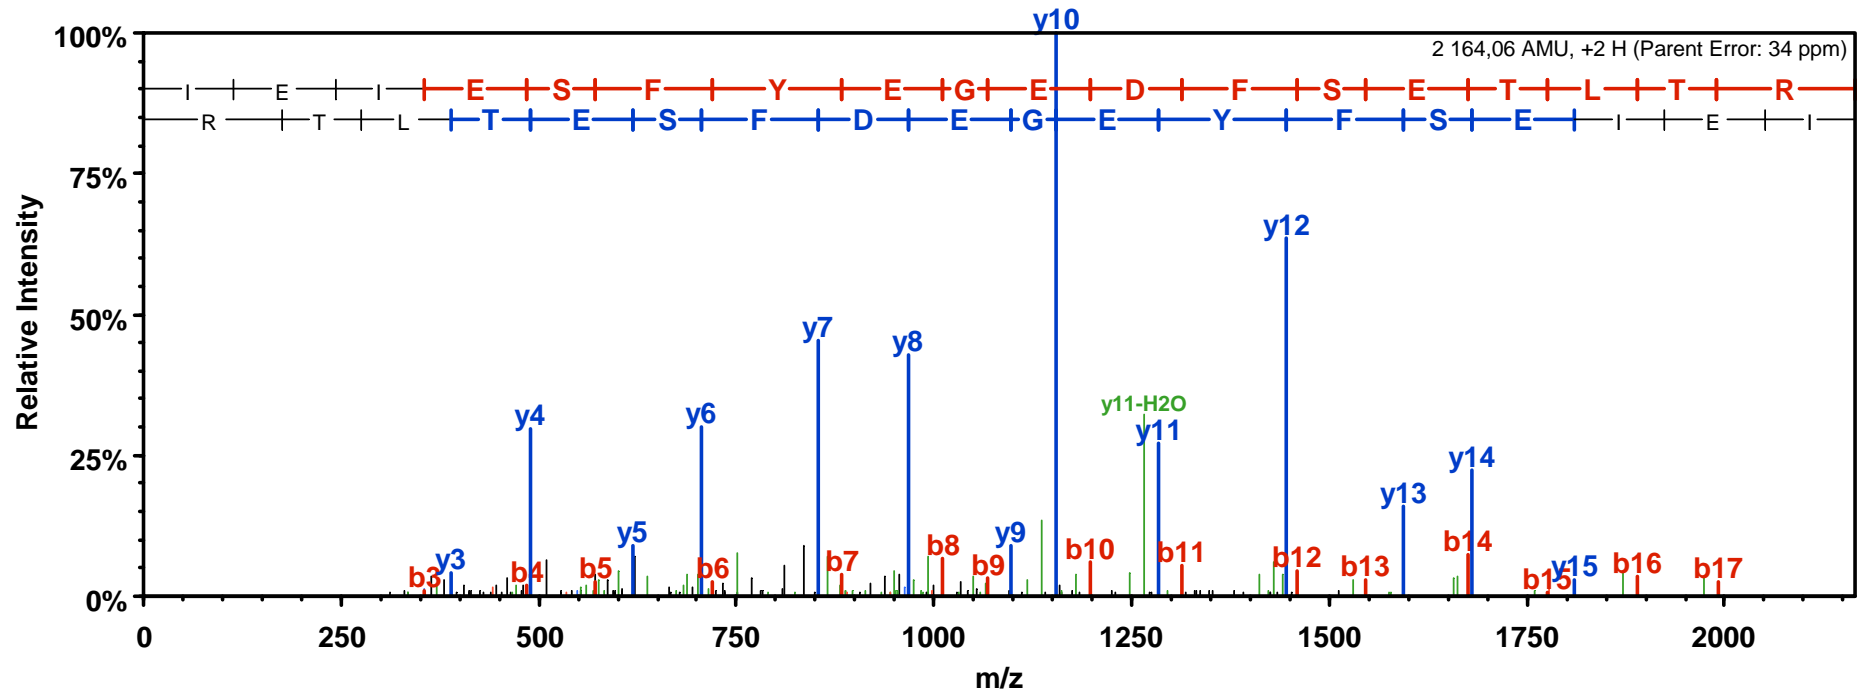

| Biological sample name | MS/MS sample name | Protein name                                                      | Peptide sequence   | Mascot Ion score |
|------------------------|-------------------|-------------------------------------------------------------------|--------------------|------------------|
| Chromofungin_15-16     | F011547 (F013448) | 78 kDa glucose-regulated protein precursor - Homo sapiens (Human) | IEIESFYEGEDFSETLTR | 110              |

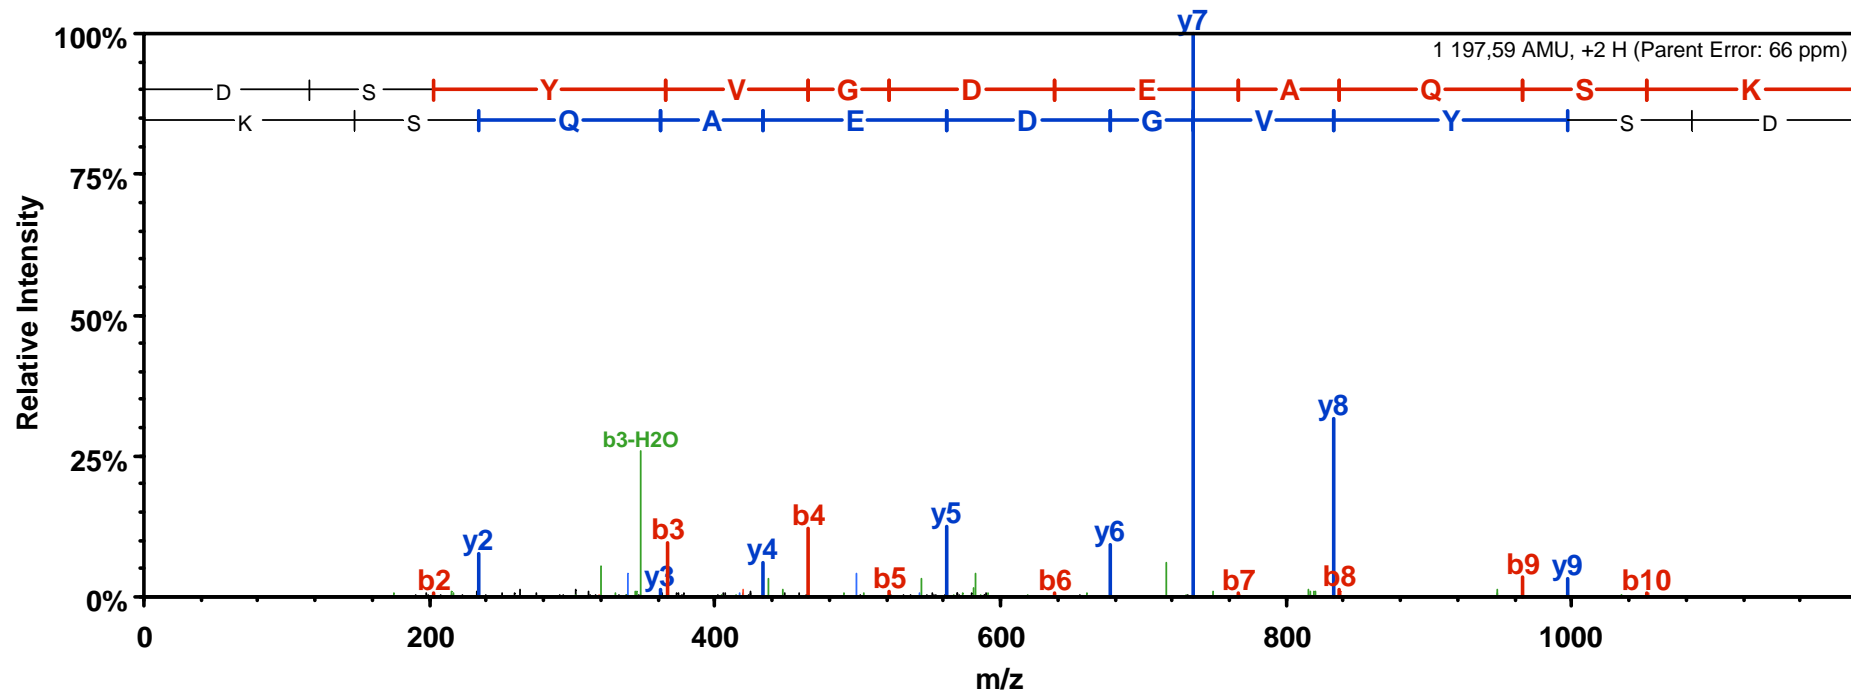

| Biological sample name | MS/MS sample name | Protein name                                | Peptide sequence        | Mascot Ion score |
|------------------------|-------------------|---------------------------------------------|-------------------------|------------------|
| Chromofungin_10        | F011542 (F013438) | Actin, cytoplasmic 1 - Homo sapiens (Human) | DSYVGDEAQS <sup>K</sup> | 72,4             |

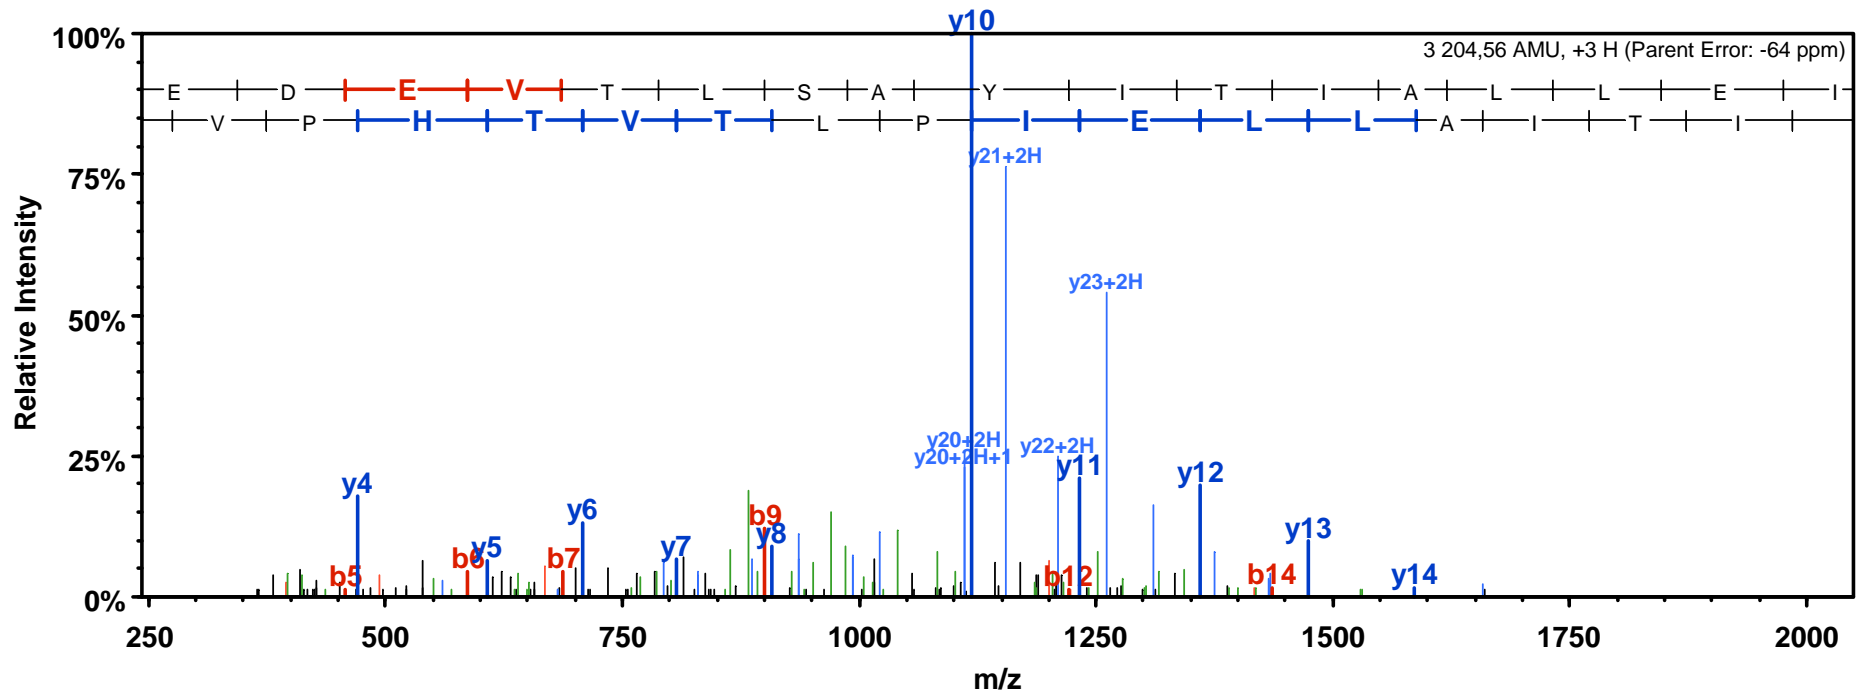

| Biological sample name | MS/MS sample name | Protein name                                           | Peptide sequence                    | Mascot Ion score |
|------------------------|-------------------|--------------------------------------------------------|-------------------------------------|------------------|
| Chromofungin_20        | F011551 (F013456) | Alpha-2-macroglobulin precursor - Homo sapiens (Human) | GGVEDEVTL SAYITIALLEIPLTVTHP<br>VVR | 91,3             |

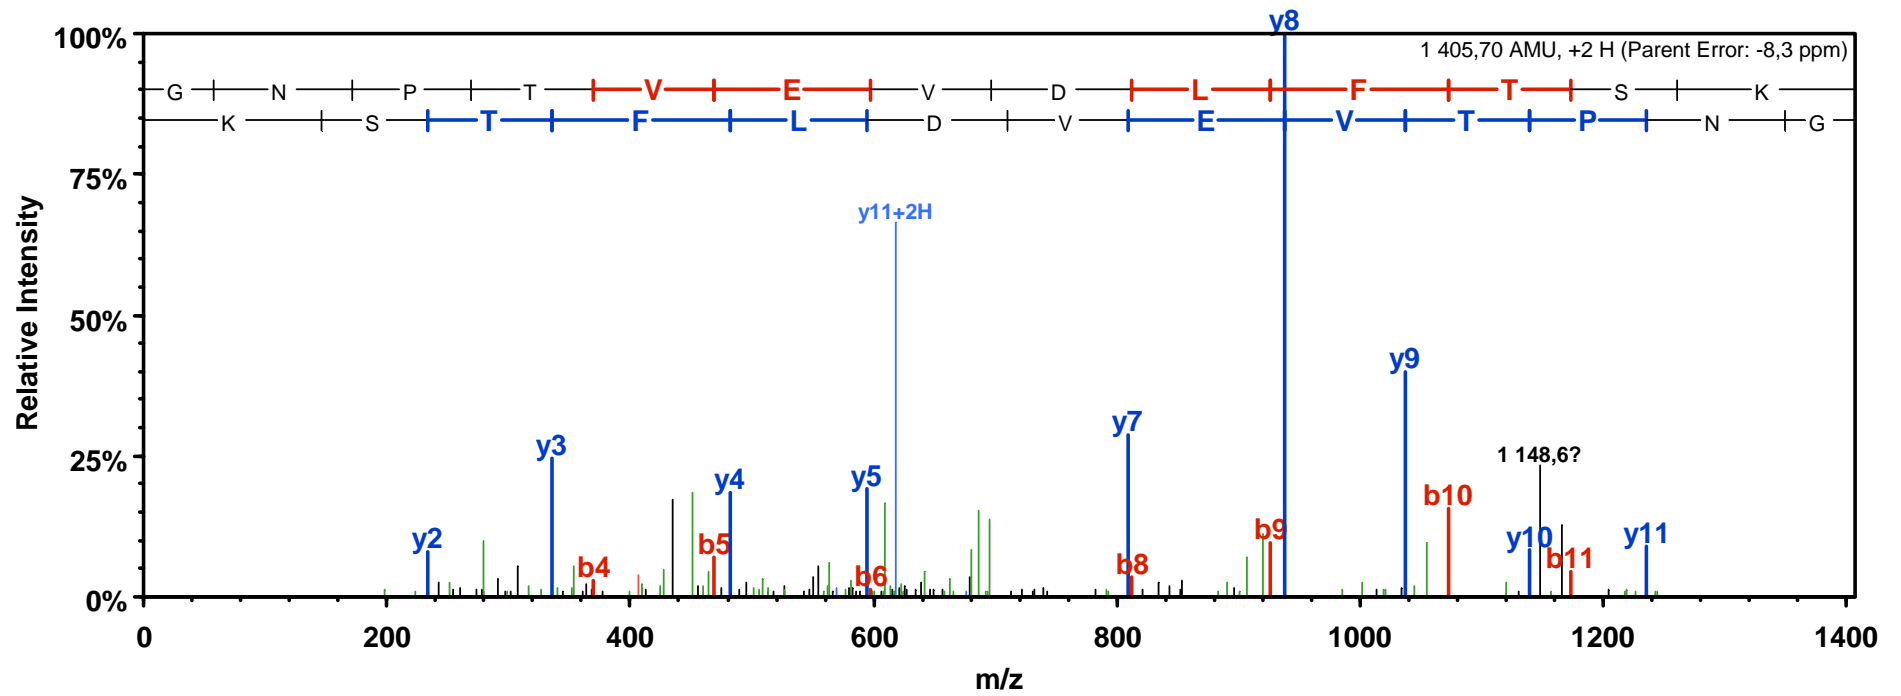

| Biological sample name | MS/MS sample name | Protein name                         | Peptide sequence | Mascot Ion score |
|------------------------|-------------------|--------------------------------------|------------------|------------------|
| Chromofungin_14        | F011546 (F013446) | Alpha-enolase - Homo sapiens (Human) | GNPTVEVDLFTSK    | 62,3             |

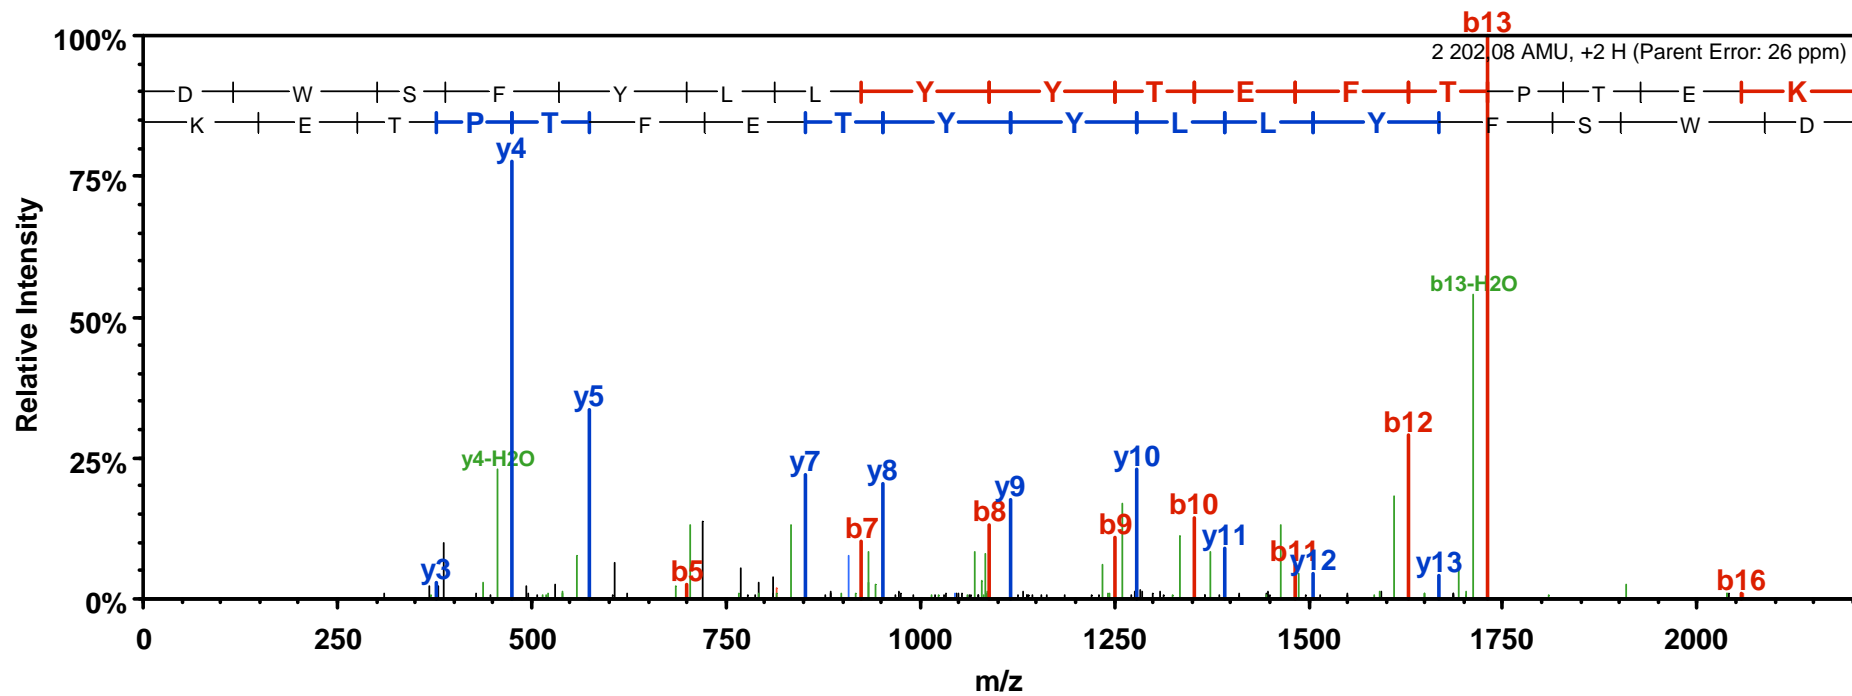

| Biological sample name | MS/MS sample name | Protein name                                                                                       | Peptide sequence | Mascot Ion score |
|------------------------|-------------------|----------------------------------------------------------------------------------------------------|------------------|------------------|
| Chromofungin_13        | F011545 (F013444) | Beta-2-microglobulin precursor [Contains: Beta-2-microglobulin form pl 5.3] - Homo sapiens (Human) | DWSFYLLYYTEFTPEK | 53,7             |

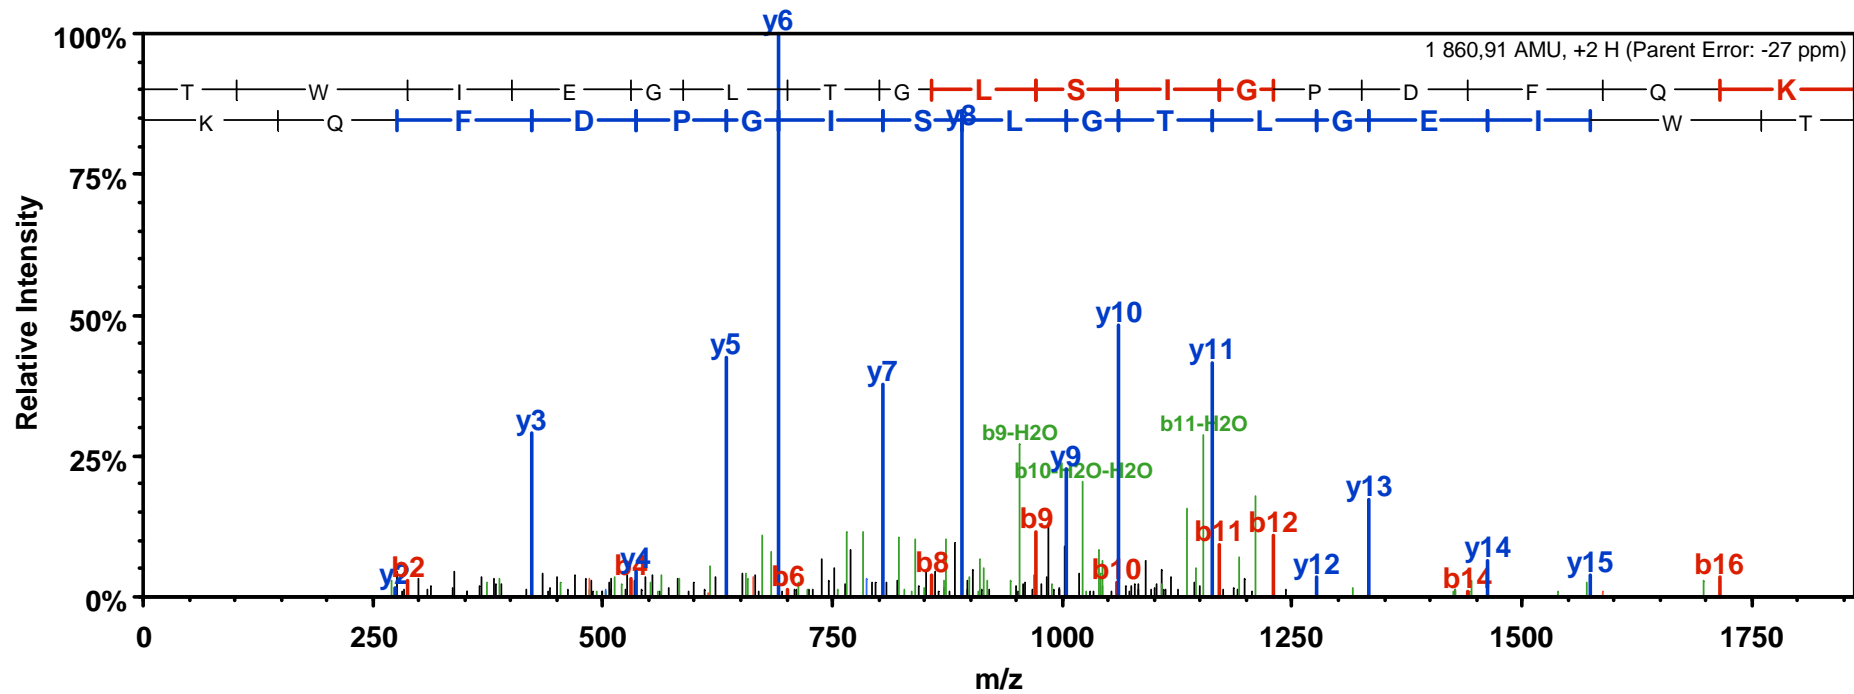

| Biological sample name | MS/MS sample name | Protein name                      | Peptide sequence  | Mascot Ion score |
|------------------------|-------------------|-----------------------------------|-------------------|------------------|
| Chromofungin_18        | F011549 (F013452) | Calponin-2 - Homo sapiens (Human) | TWIEGLTGLSIGPDFQK | 118              |



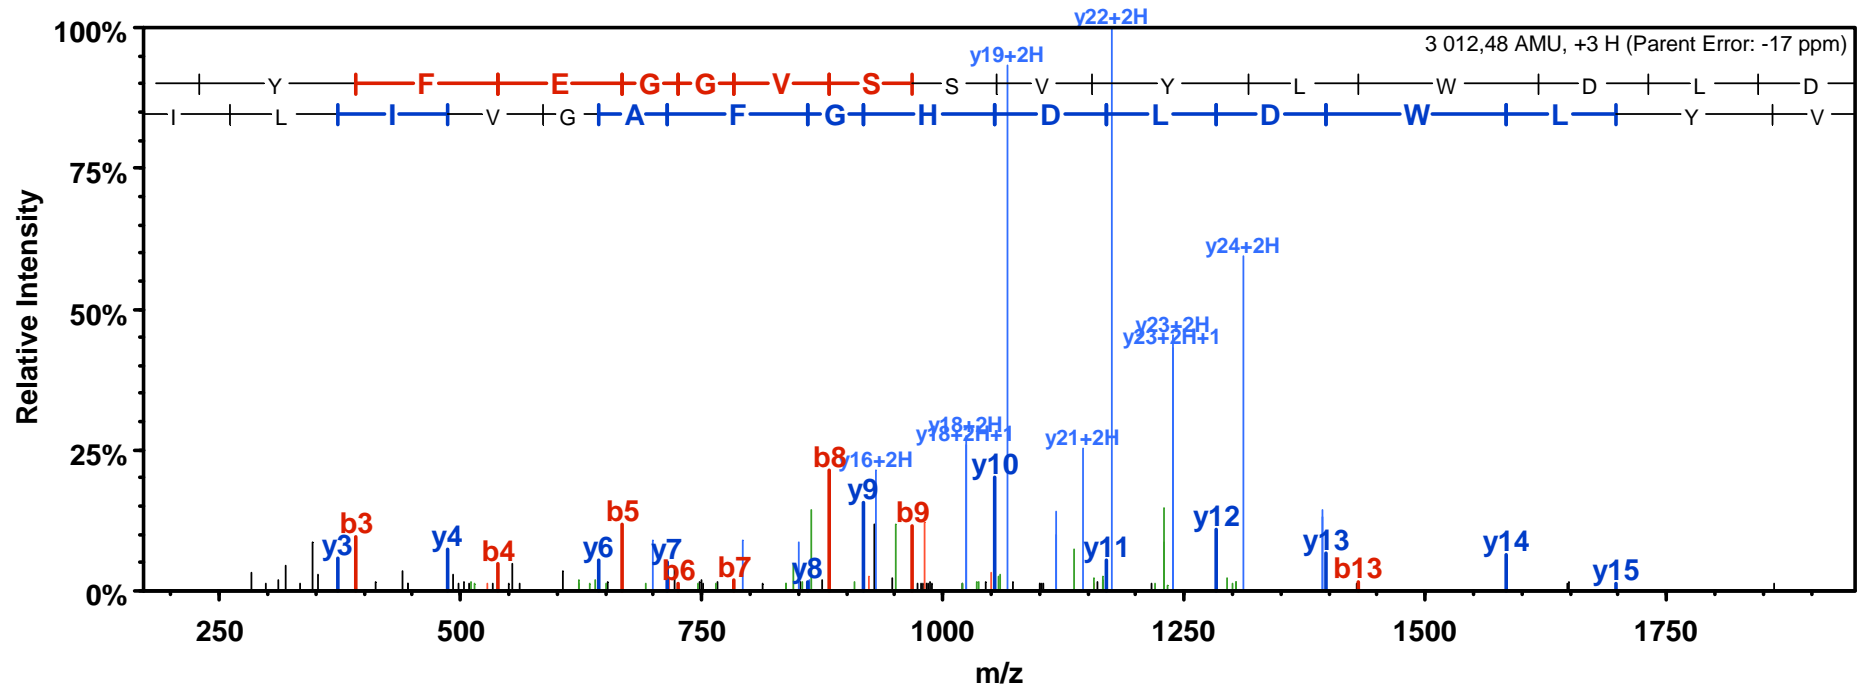

| Biological sample name | MS/MS sample name | Protein name                                                | Peptide sequence         | Mascot Ion score |
|------------------------|-------------------|-------------------------------------------------------------|--------------------------|------------------|
| Chromofungin_15-16     | F011547 (F013448) | F-actin-capping protein subunit beta - Homo sapiens (Human) | DLYFEGGVSSVYLWDLDFAGVLIK | 85,7             |

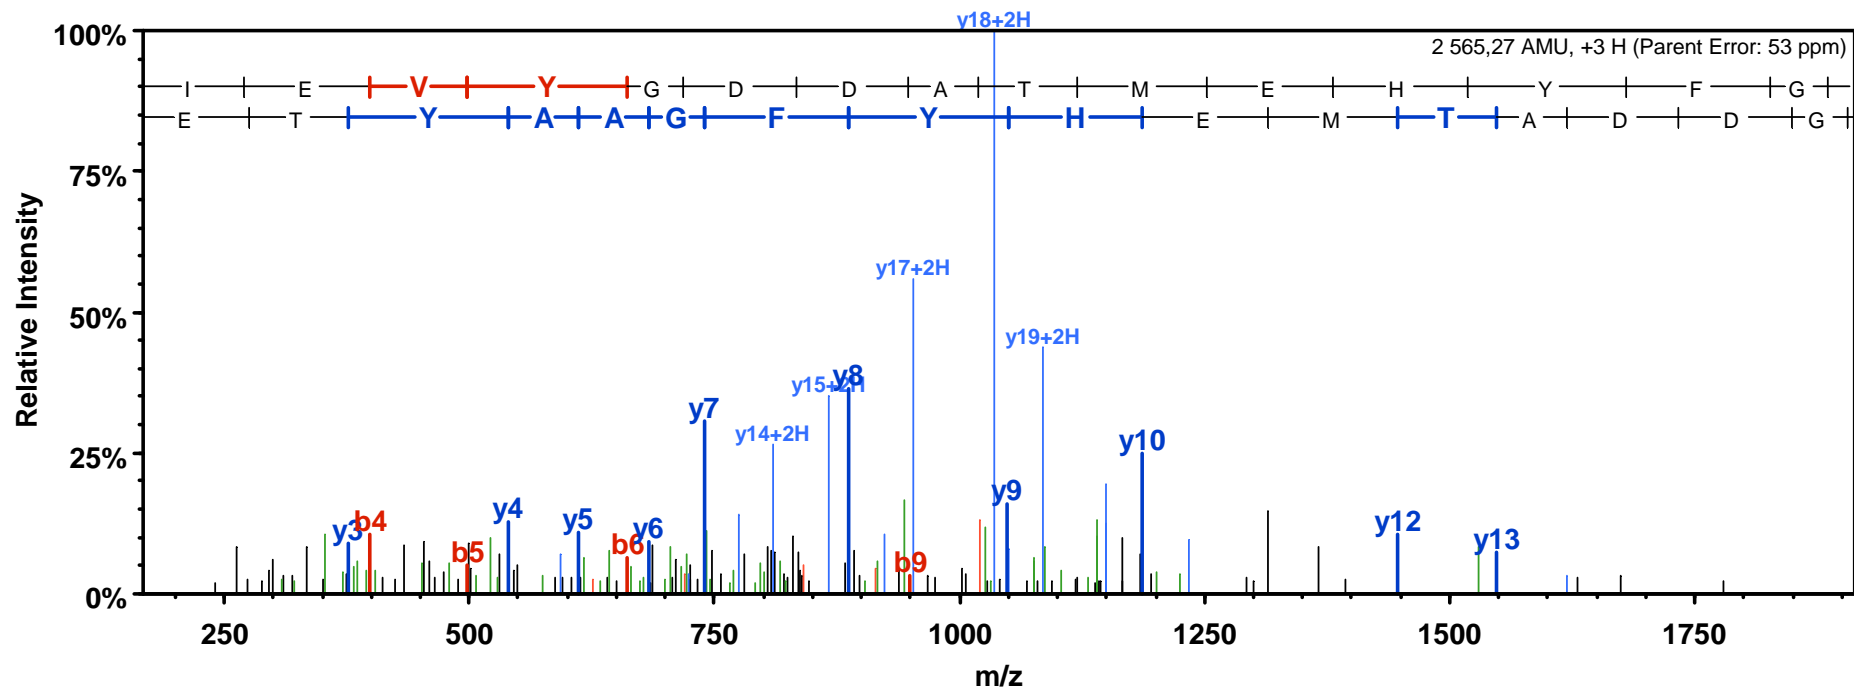

| Biological sample name | MS/MS sample name | Protein name                                                                                          | Peptide sequence        | Mascot Ion score |
|------------------------|-------------------|-------------------------------------------------------------------------------------------------------|-------------------------|------------------|
| Chromofungin_6         | F011538 (F013430) | Genome polyprotein [Contains: P1 proteinase - Lettuce mosaic virus (strain 0 / isolate French) (LMV)] | VGIEVYGDDATMEHYFGAAYTEK | 75,8             |

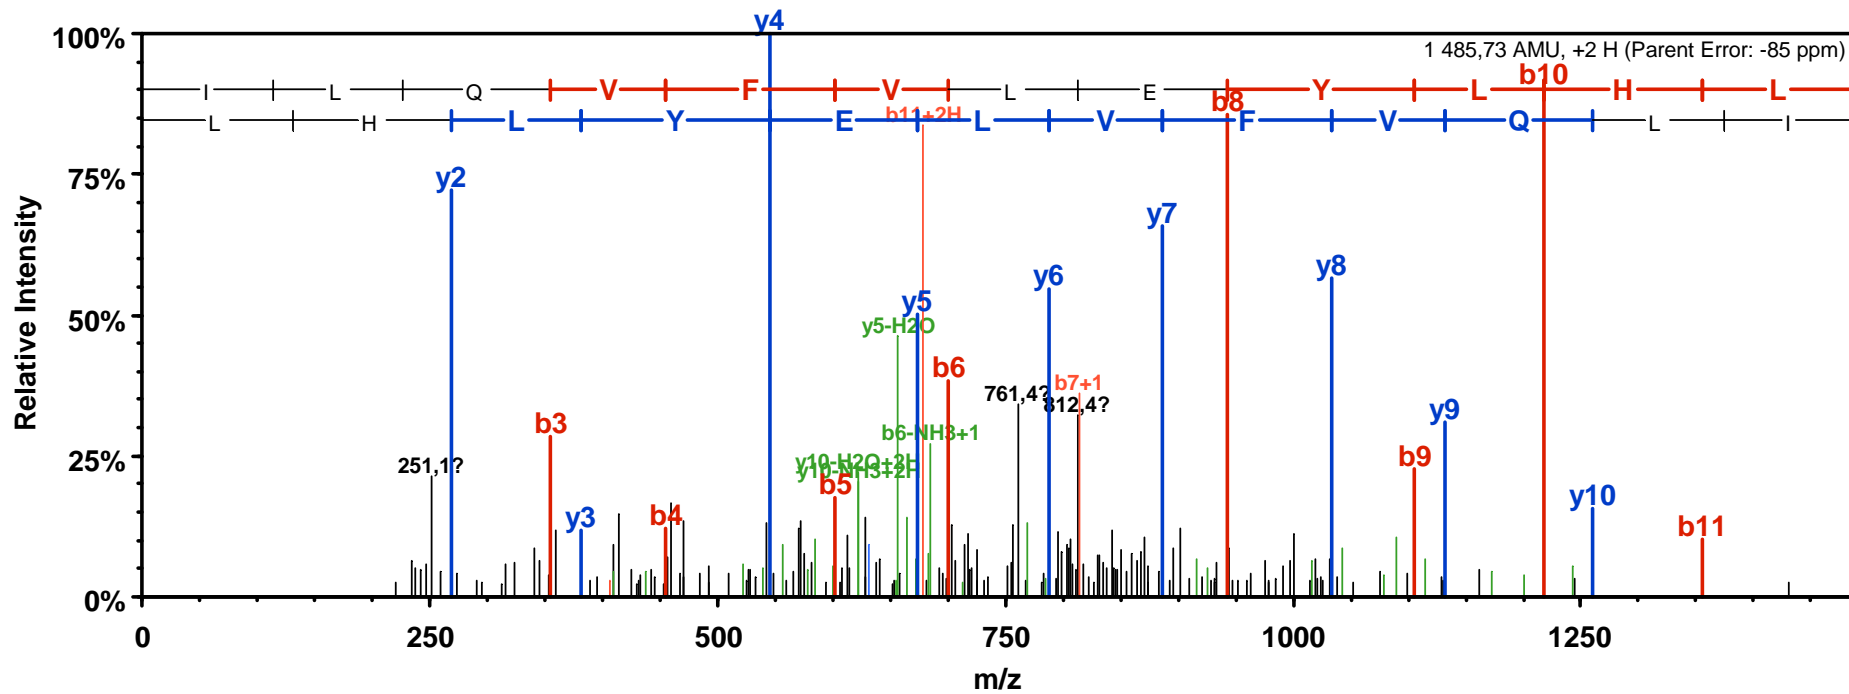

| Biological sample name | MS/MS sample name | Protein name                                                        | Peptide sequence | Mascot Ion score |
|------------------------|-------------------|---------------------------------------------------------------------|------------------|------------------|
| Chromofungin_19        | F011550 (F013454) | Glutaminy-peptide cyclotransferase precursor - Homo sapiens (Human) | ILQVFVLEYLHL     | 60,8             |

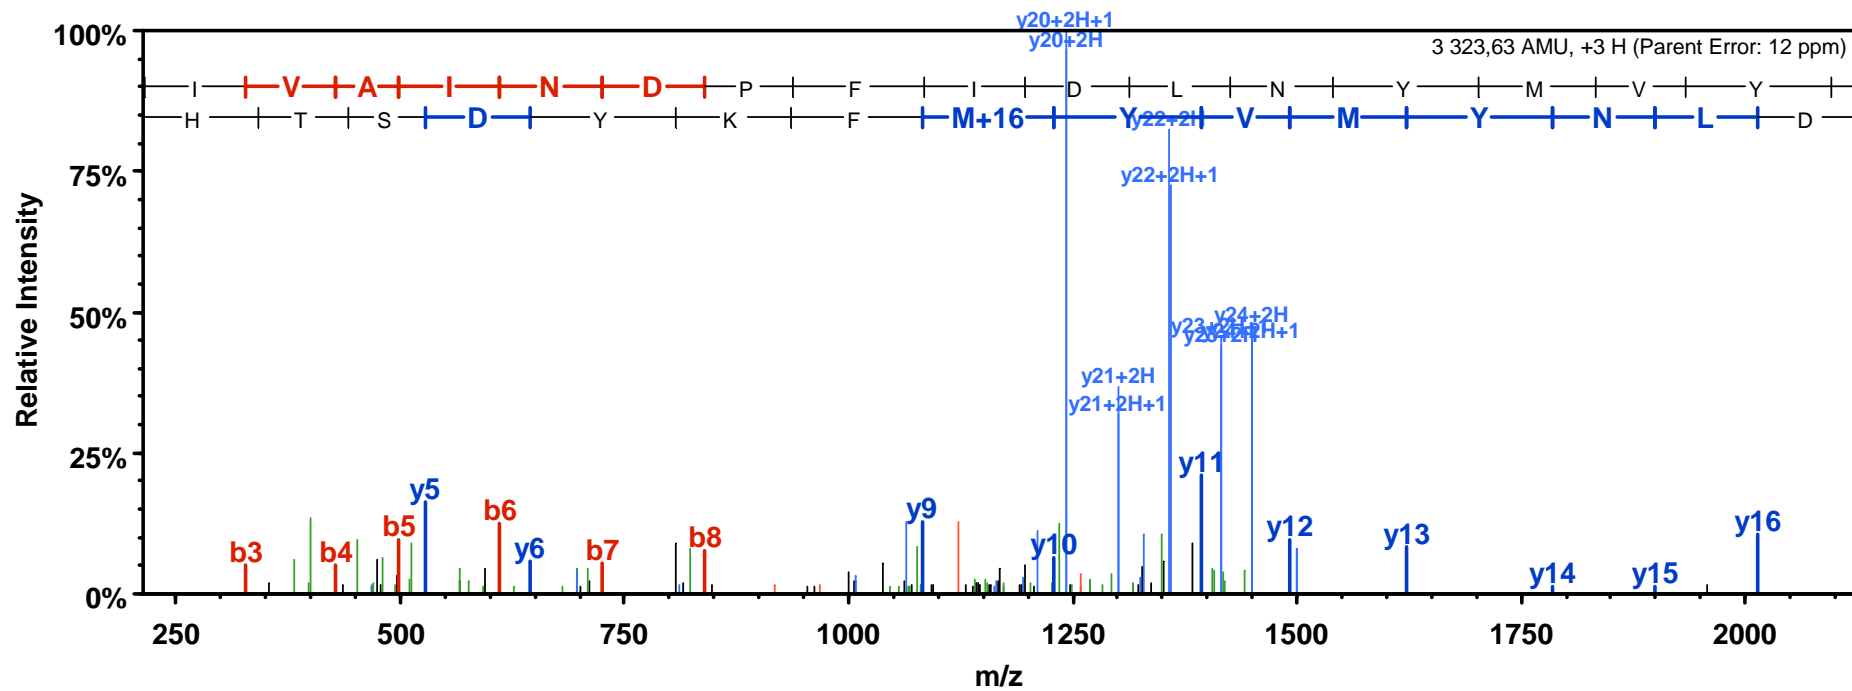

| Biological sample name | MS/MS sample name | Protein name                                                                                           | Peptide sequence                | Mascot Ion score |
|------------------------|-------------------|--------------------------------------------------------------------------------------------------------|---------------------------------|------------------|
| Chromofungin_15-16     | F011547 (F013448) | Glyceraldehyde-3-phosphate dehydrogenase, muscle - <i>Jaculus orientalis</i> (Greater Egyptian jerboa) | VDIVAINDPFIDLNYMVMFKYDSTH<br>GK | 66,2             |

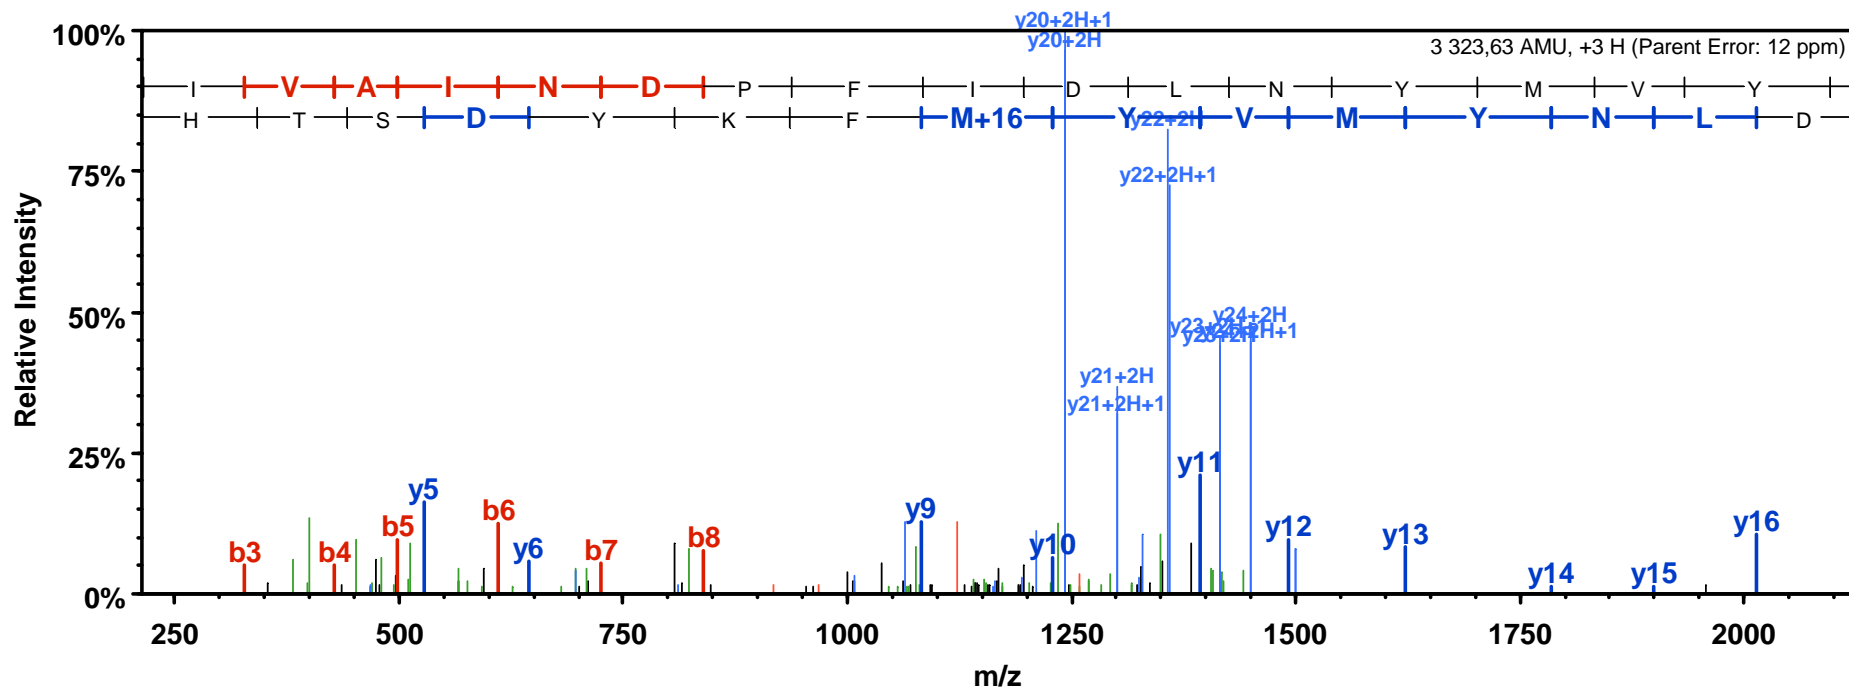

| Biological sample name | MS/MS sample name | Protein name                                           | Peptide sequence            | Mascot Ion score |
|------------------------|-------------------|--------------------------------------------------------|-----------------------------|------------------|
| Chromofungin_15-16     | F011547 (F013448) | Heat shock protein HSP 90-alpha - Homo sapiens (Human) | DLVILLYETALLSSGFSLEDPQTHANR | 120              |

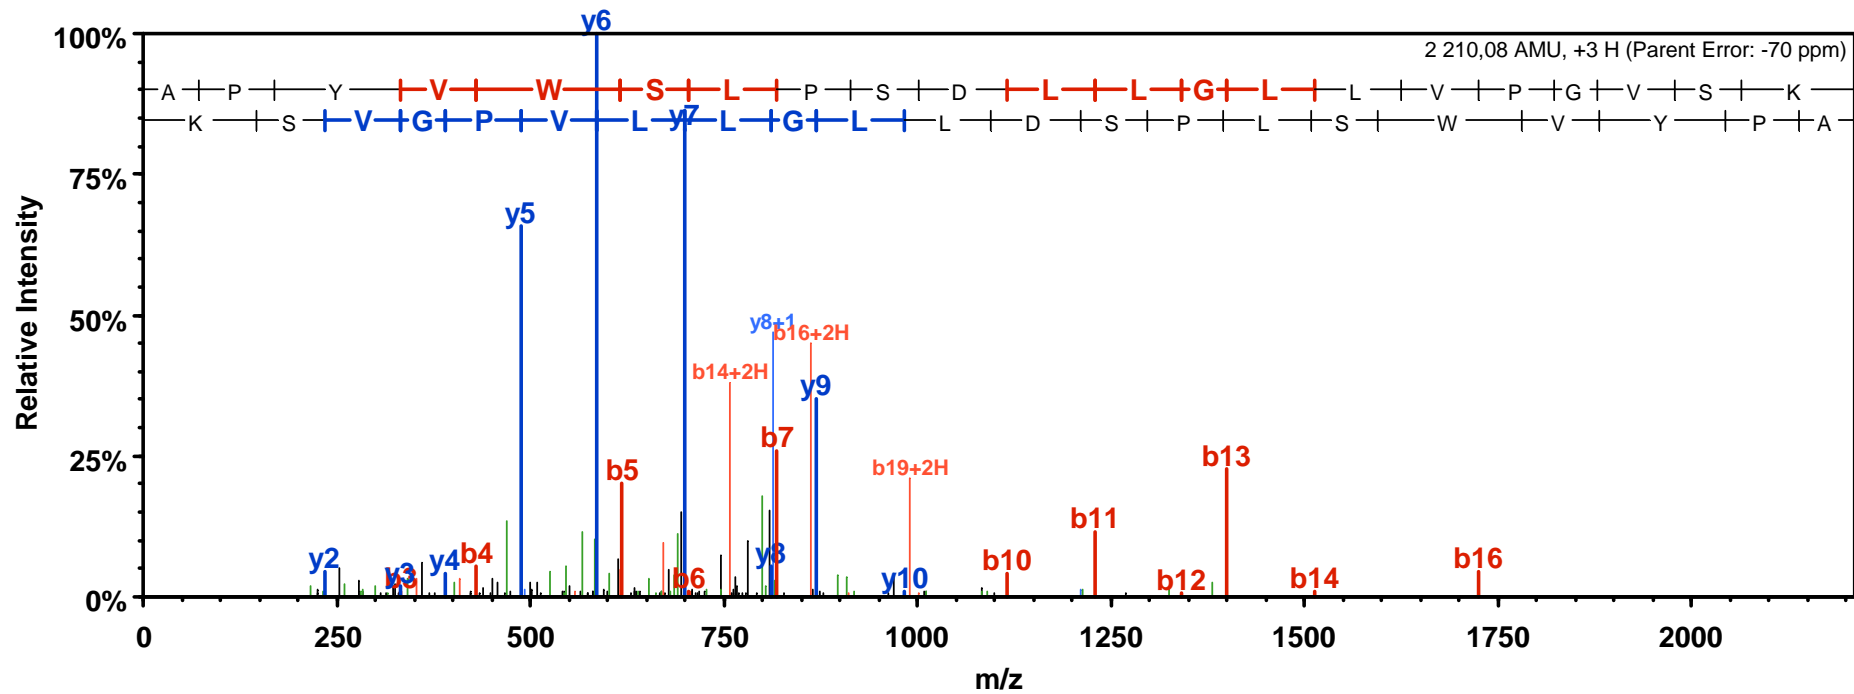

| Biological sample name | MS/MS sample name | Protein name                                                                                 | Peptide sequence      | Mascot Ion score |
|------------------------|-------------------|----------------------------------------------------------------------------------------------|-----------------------|------------------|
| Chromofungin_13        | F011545 (F013444) | Leukocyte immunoglobulin-like receptor subfamily A member 3 precursor - Homo sapiens (Human) | APYVWSLPSDLLGLLVPGVSK | 54,1             |

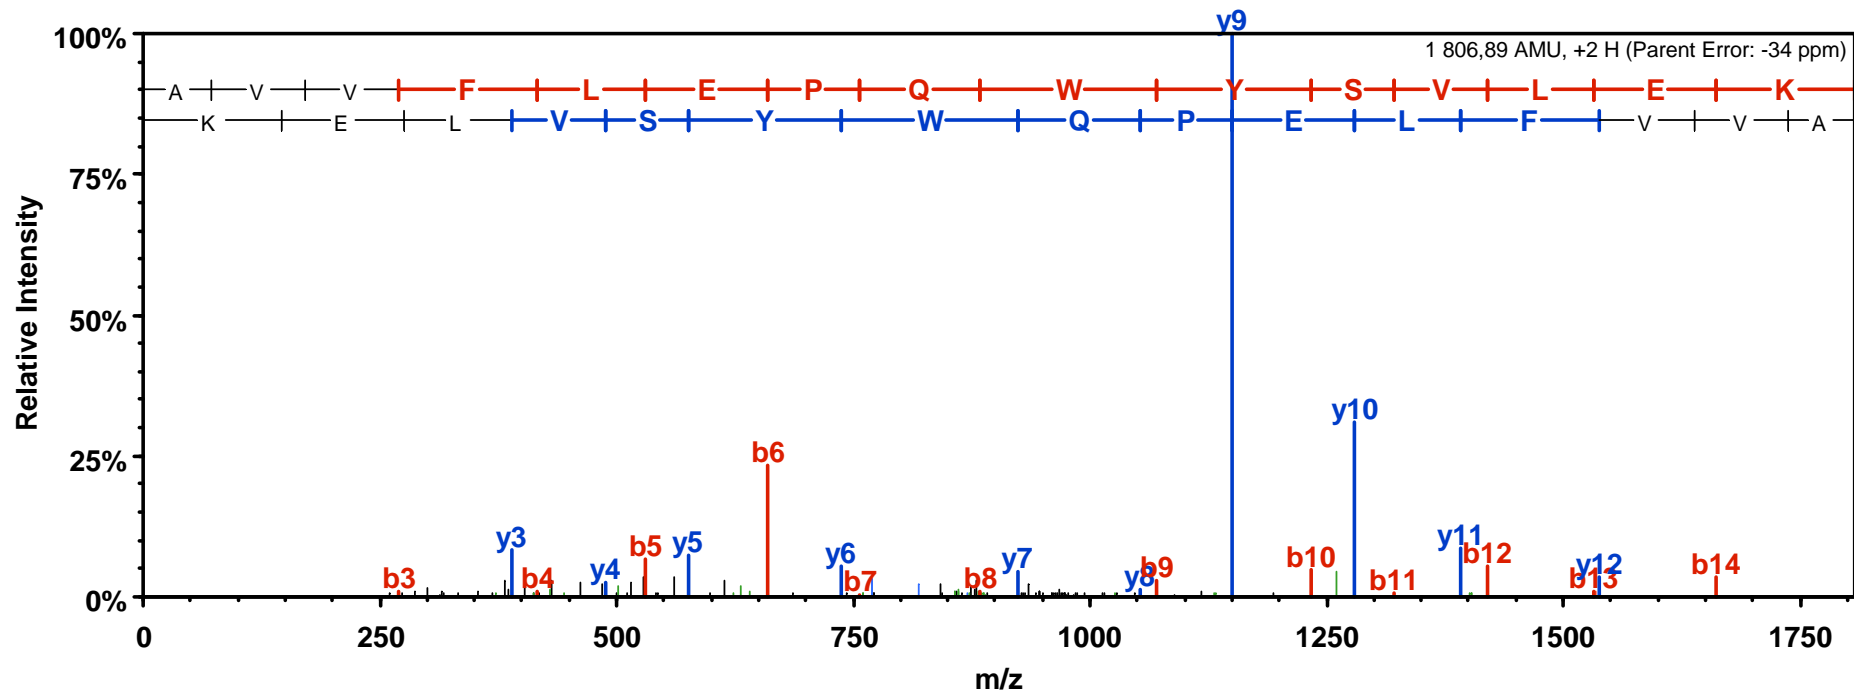

| Biological sample name | MS/MS sample name | Protein name                                                                                | Peptide sequence | Mascot Ion score |
|------------------------|-------------------|---------------------------------------------------------------------------------------------|------------------|------------------|
| Chromofungin_13        | F011545 (F013444) | Low affinity immunoglobulin gamma Fc region receptor III-B precursor - Homo sapiens (Human) | AVVFLEPQWYSLVLEK | 87,7             |

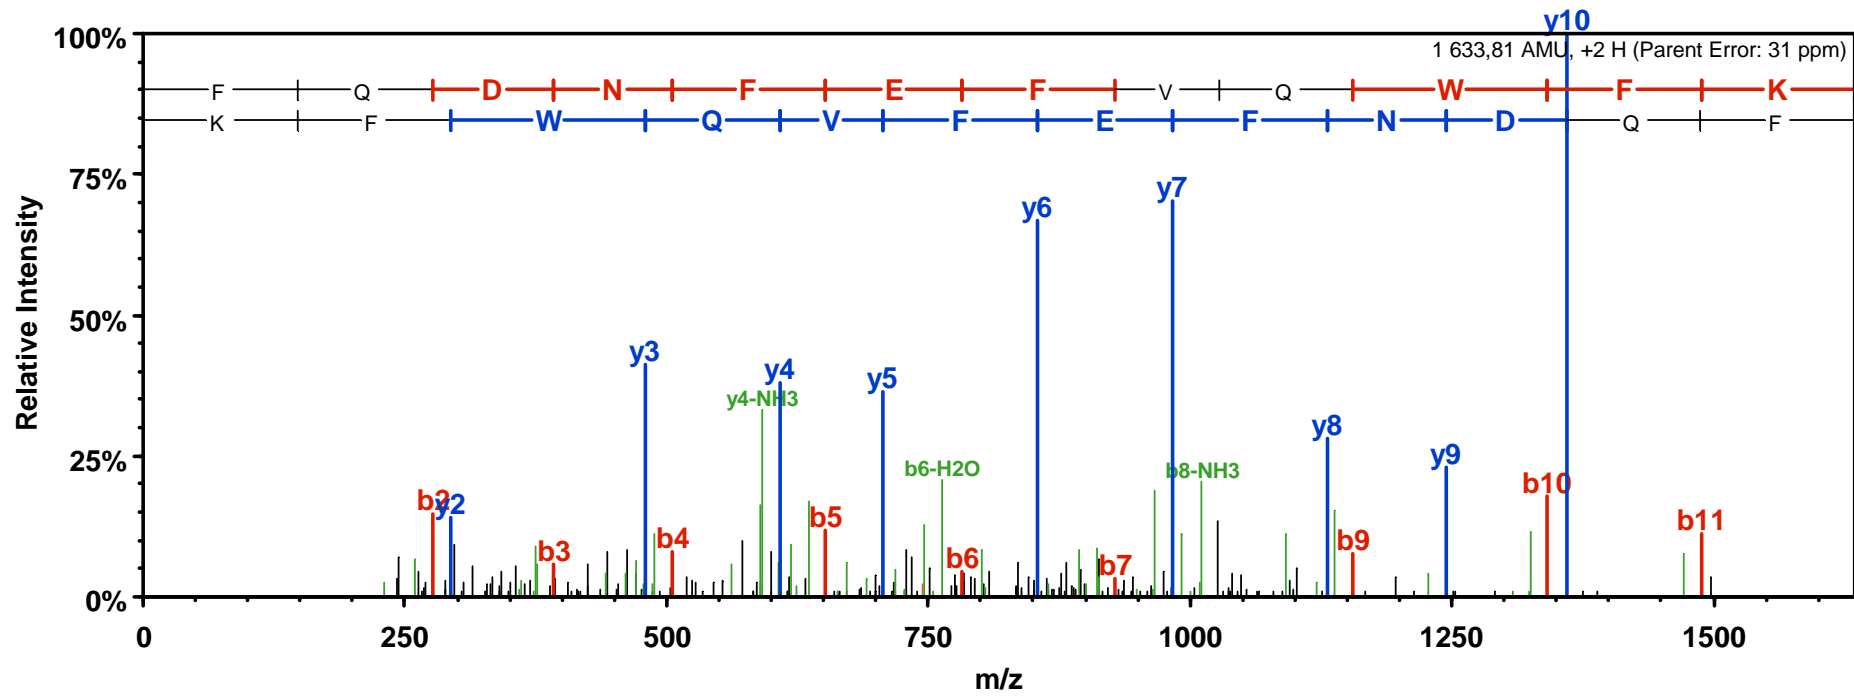

| Biological sample name | MS/MS sample name | Protein name                                                                | Peptide sequence | Mascot Ion score |
|------------------------|-------------------|-----------------------------------------------------------------------------|------------------|------------------|
| Chromofungin_19        | F011550 (F013454) | Microtubule-associated protein RP/EB family member 1 - Homo sapiens (Human) | FQDNFEFVQWFK     | 82,7             |



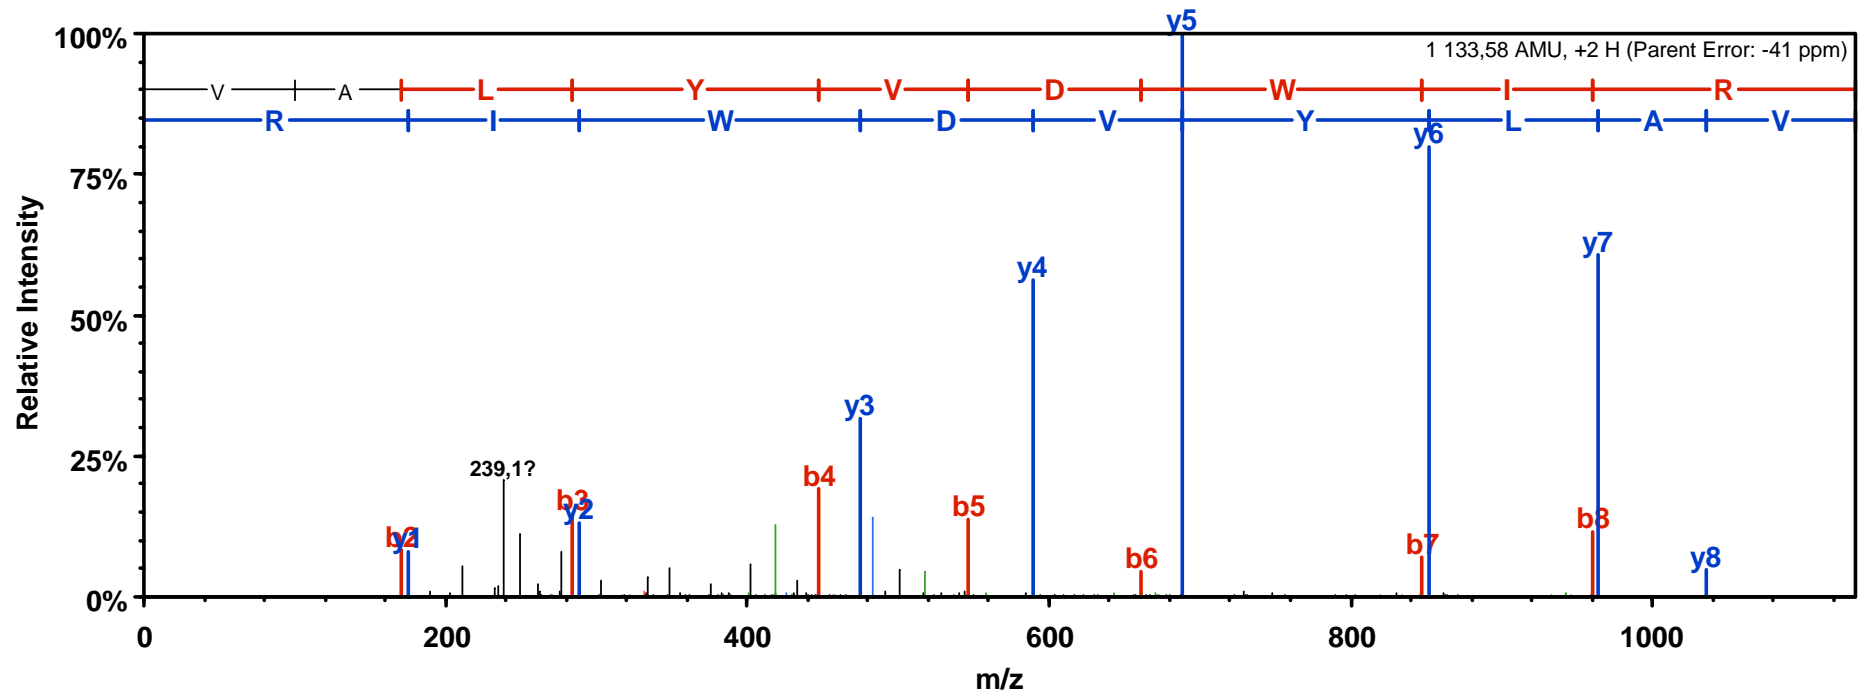

| Biological sample name | MS/MS sample name | Protein name                                  | Peptide sequence | Mascot Ion score |
|------------------------|-------------------|-----------------------------------------------|------------------|------------------|
| Chromofungin_17        | F011548 (F013450) | Myeloblastin precursor - Homo sapiens (Human) | VALYVDWIR        | 58,1             |

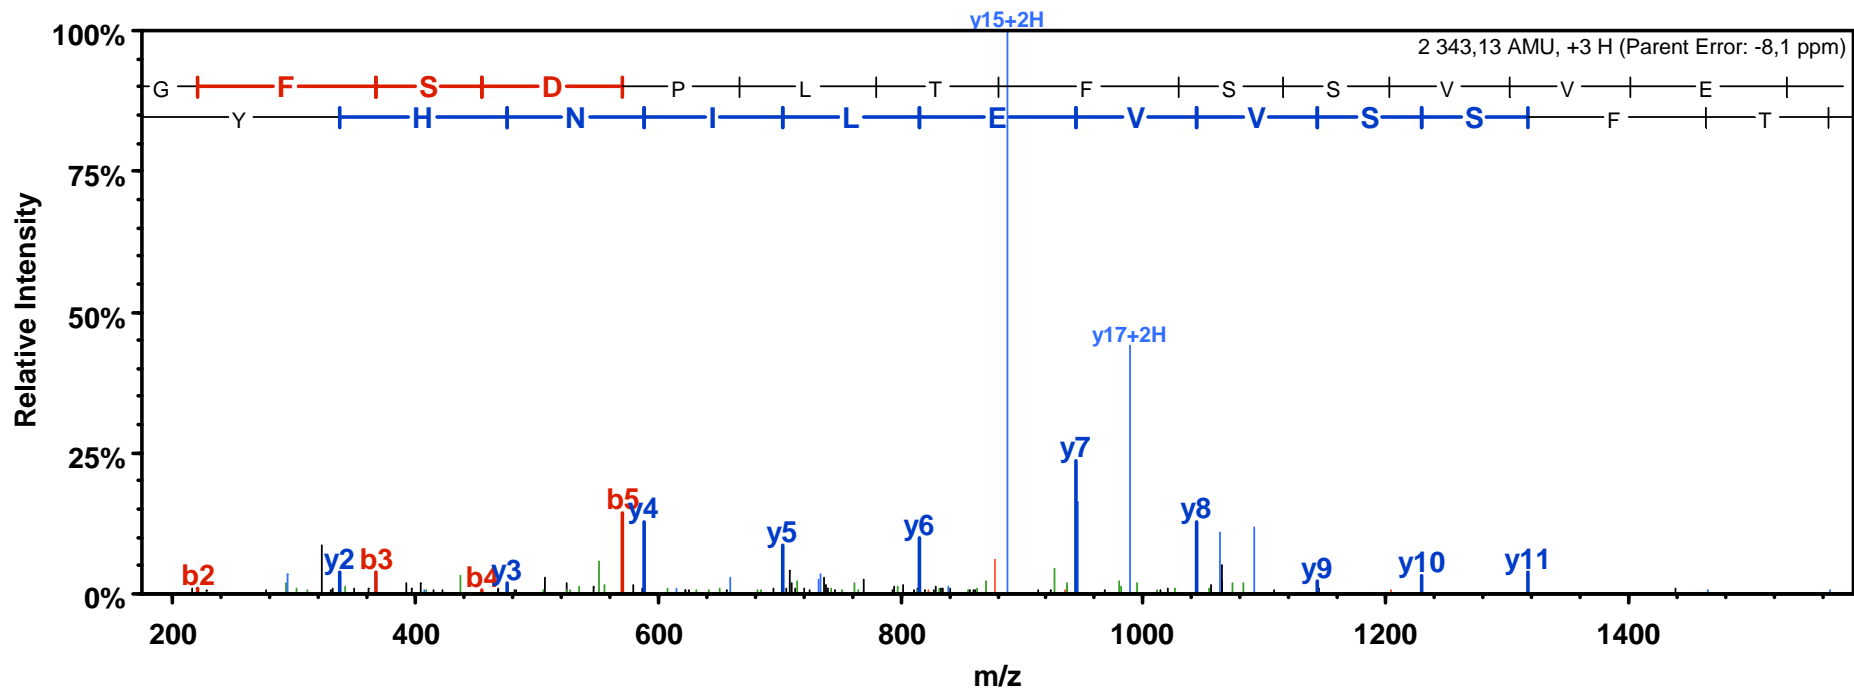

| Biological sample name | MS/MS sample name | Protein name                                                                  | Peptide sequence     | Mascot Ion score |
|------------------------|-------------------|-------------------------------------------------------------------------------|----------------------|------------------|
| Chromofungin_14        | F011546 (F013446) | Phosphatidylinositol 3-kinase regulatory subunit alpha - Homo sapiens (Human) | YGFSDPLTFSSVVELINHYR | 58,1             |

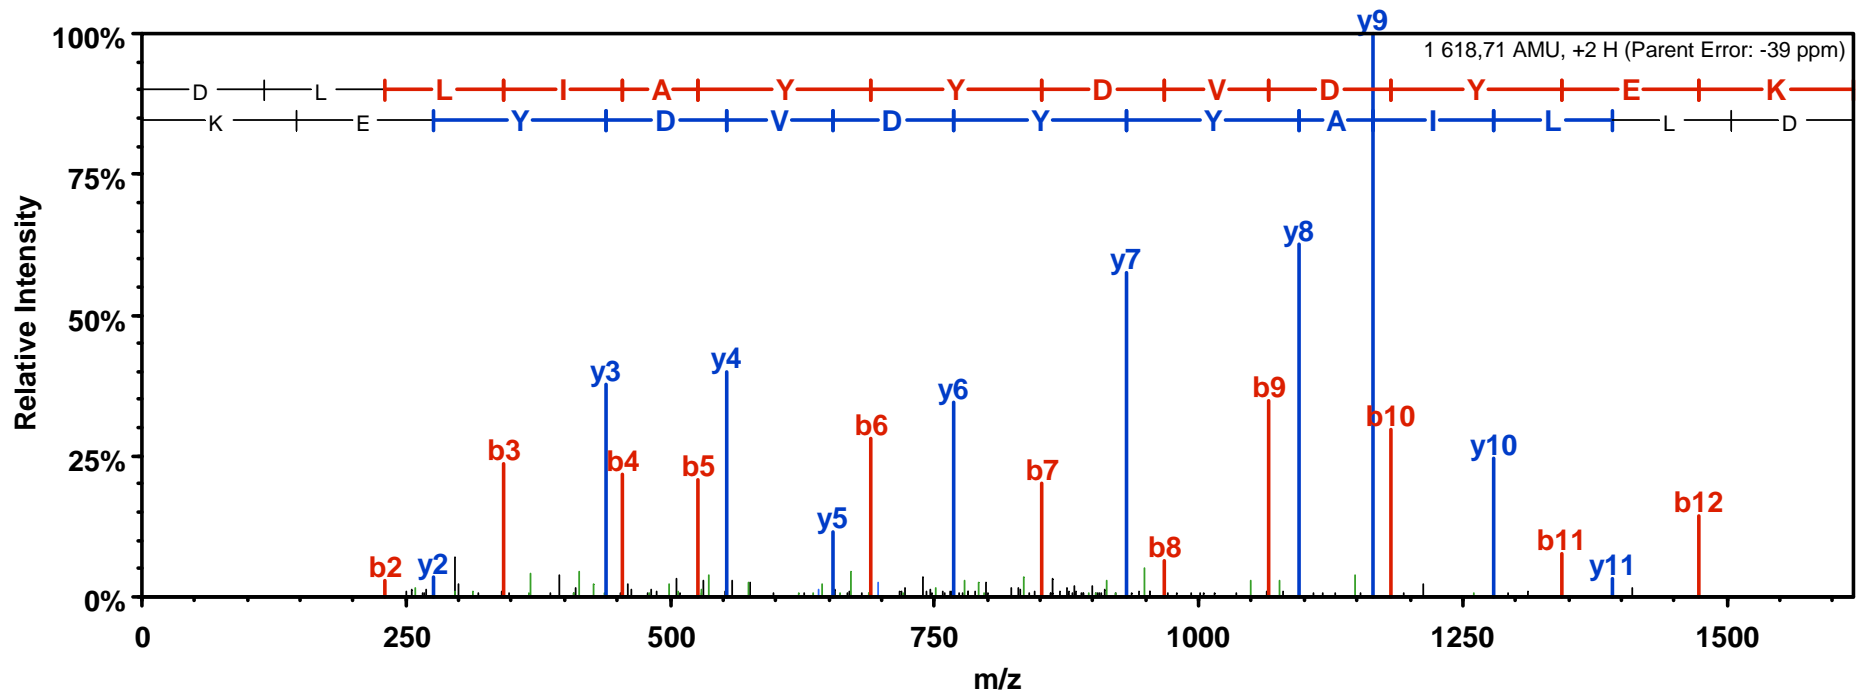

| Biological sample name | MS/MS sample name | Protein name                                                    | Peptide sequence | Mascot Ion score |
|------------------------|-------------------|-----------------------------------------------------------------|------------------|------------------|
| Chromofungin_15-16     | F011547 (F013448) | Protein disulfide-isomerase A3 precursor - Homo sapiens (Human) | DLLIYYDVDYEK     | 96,5             |

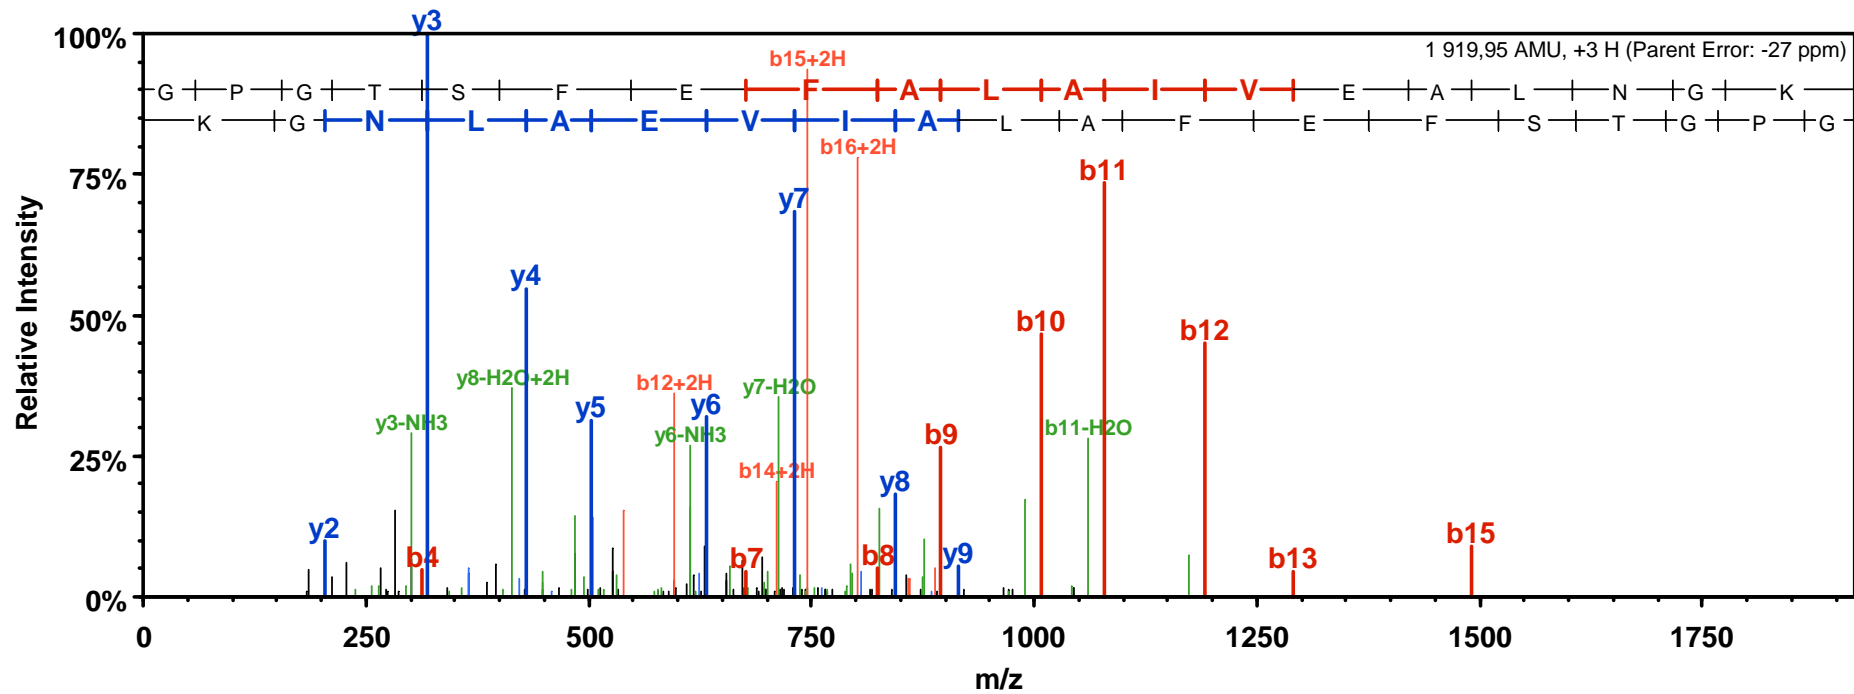

| Biological sample name | MS/MS sample name | Protein name                        | Peptide sequence       | Mascot Ion score |
|------------------------|-------------------|-------------------------------------|------------------------|------------------|
| Chromofungin_15-16     | F011547 (F013448) | Protein DJ-1 - Homo sapiens (Human) | GPGTSGEFAVALEAFESVTGPK | 75,2             |

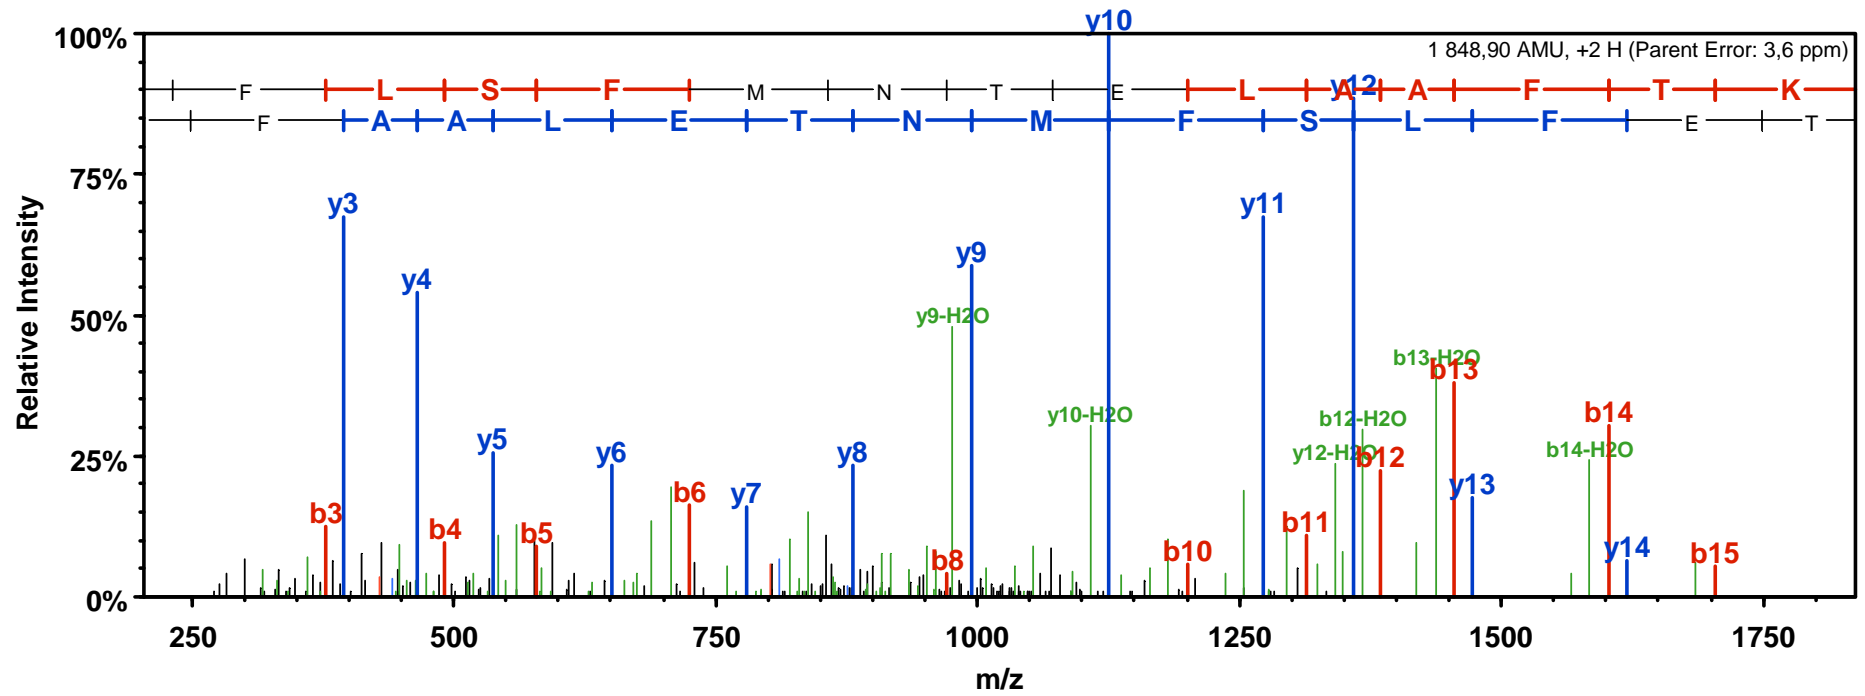

| Biological sample name | MS/MS sample name | Protein name                            | Peptide sequence | Mascot Ion score |
|------------------------|-------------------|-----------------------------------------|------------------|------------------|
| Chromofungin_17        | F011548 (F013450) | Protein S100-A11 - Homo sapiens (Human) | TEFLSFMNTELAFTK  | 106              |

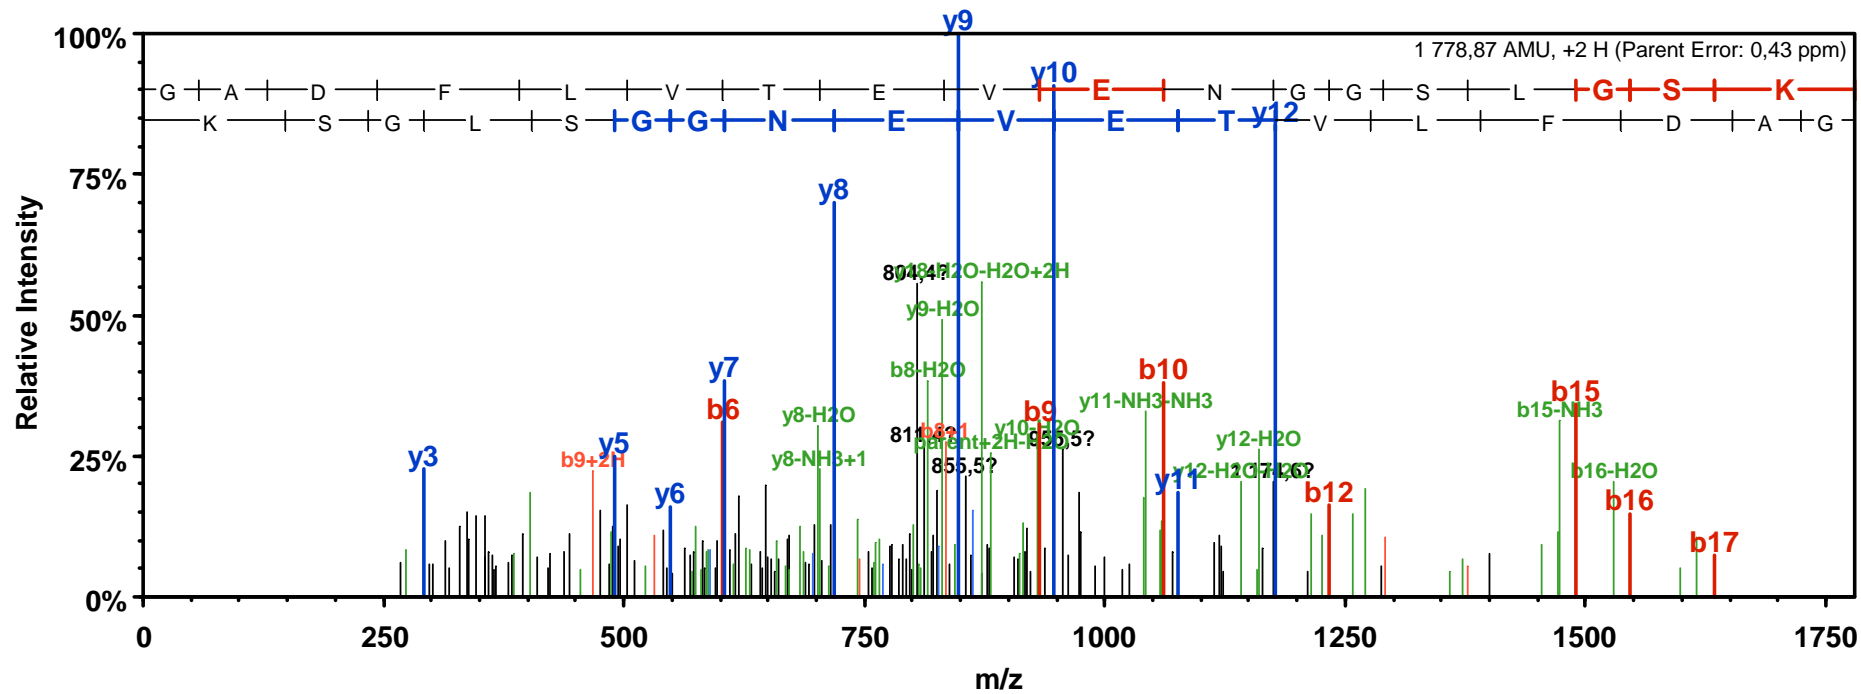

| Biological sample name | MS/MS sample name | Protein name                                          | Peptide sequence    | Mascot Ion score |
|------------------------|-------------------|-------------------------------------------------------|---------------------|------------------|
| Chromofungin_10        | F011542 (F013438) | Pyruvate kinase isozymes M1/M2 - Homo sapiens (Human) | GADFLVTEVENGGSLSGSK | 54               |

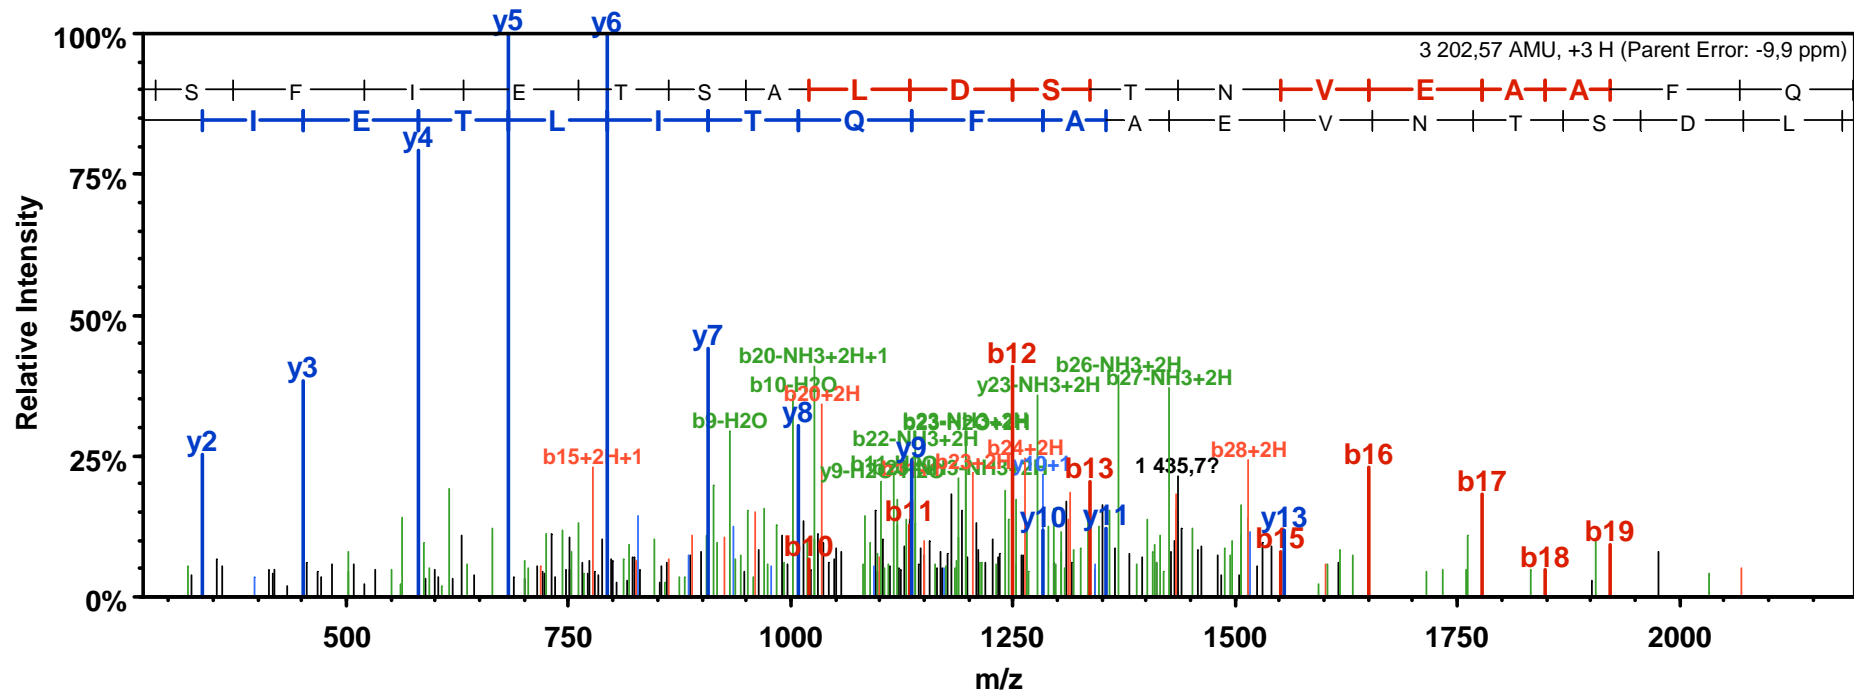

| Biological sample name | MS/MS sample name | Protein name                                       | Peptide sequence             | Mascot Ion score |
|------------------------|-------------------|----------------------------------------------------|------------------------------|------------------|
| Chromofungin_19        | F011550 (F013454) | Ras-related protein Rab-11A - Homo sapiens (Human) | NGLSFIETSALDSTNVEAAFQILTEIYR | 54,8             |

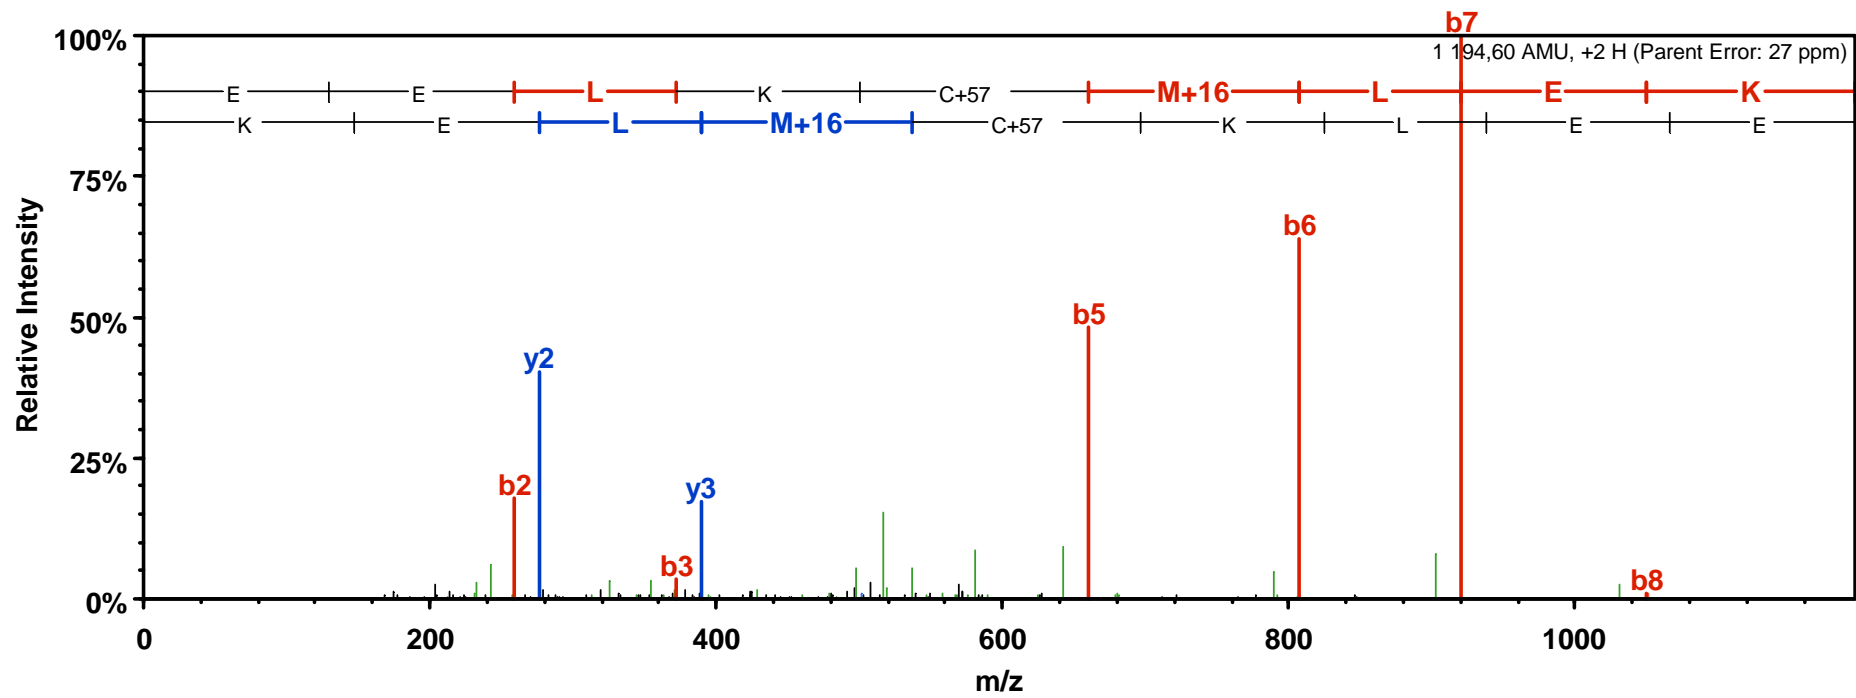

| Biological sample name | MS/MS sample name | Protein name                                           | Peptide sequence | Mascot Ion score |
|------------------------|-------------------|--------------------------------------------------------|------------------|------------------|
| Chromofungin_14        | F011546 (F013446) | Testis-specific gene 10 protein - Homo sapiens (Human) | EELKCMLEK        | 55,6             |



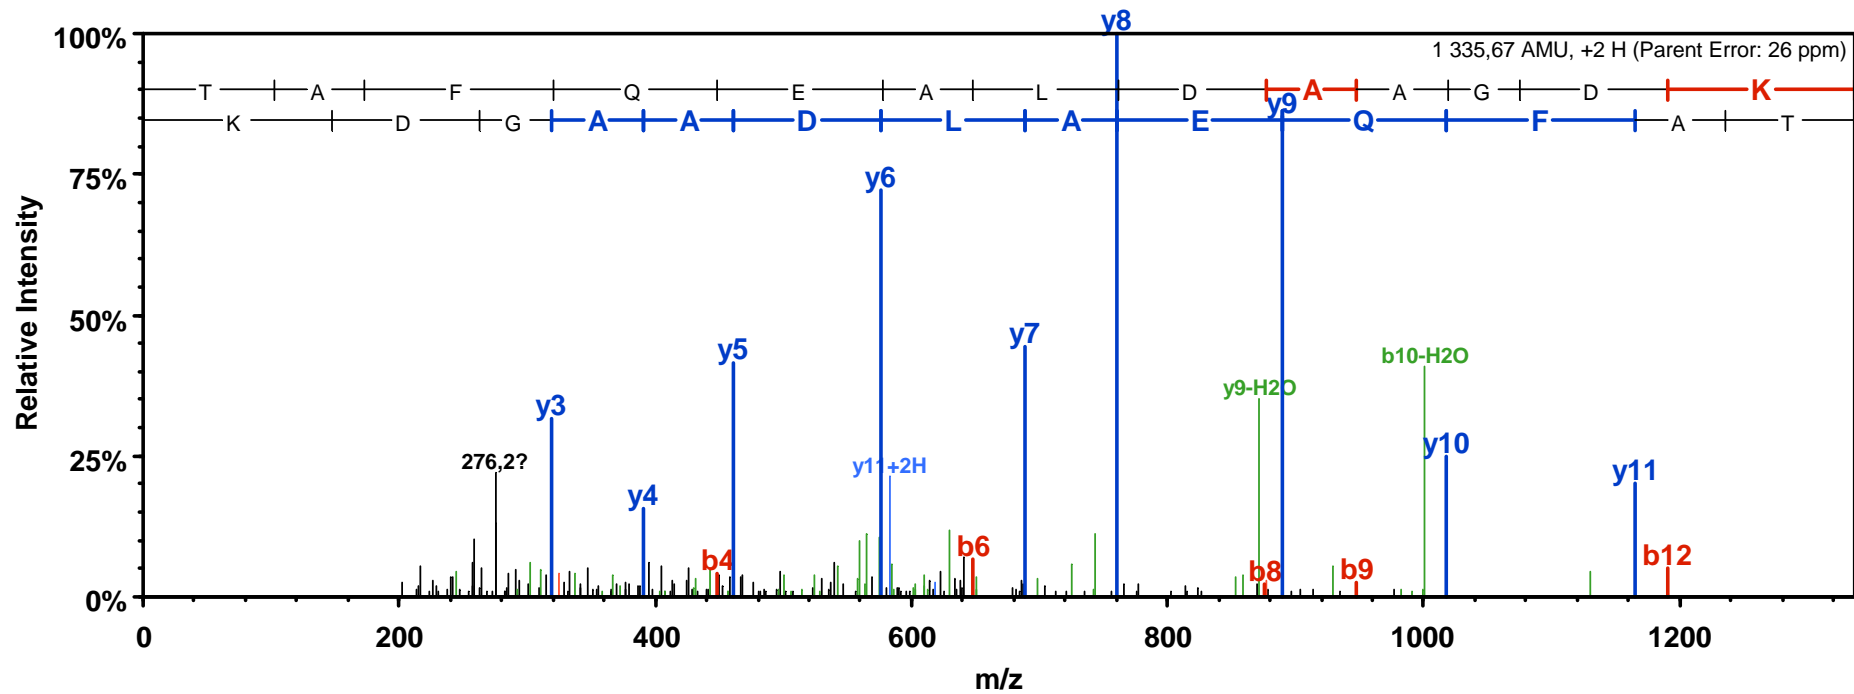

| Biological sample name | MS/MS sample name | Protein name                       | Peptide sequence | Mascot Ion score |
|------------------------|-------------------|------------------------------------|------------------|------------------|
| Chromofungin_13        | F011545 (F013444) | Thioredoxin - Homo sapiens (Human) | TAFQEALDAAGDK    | 79,4             |

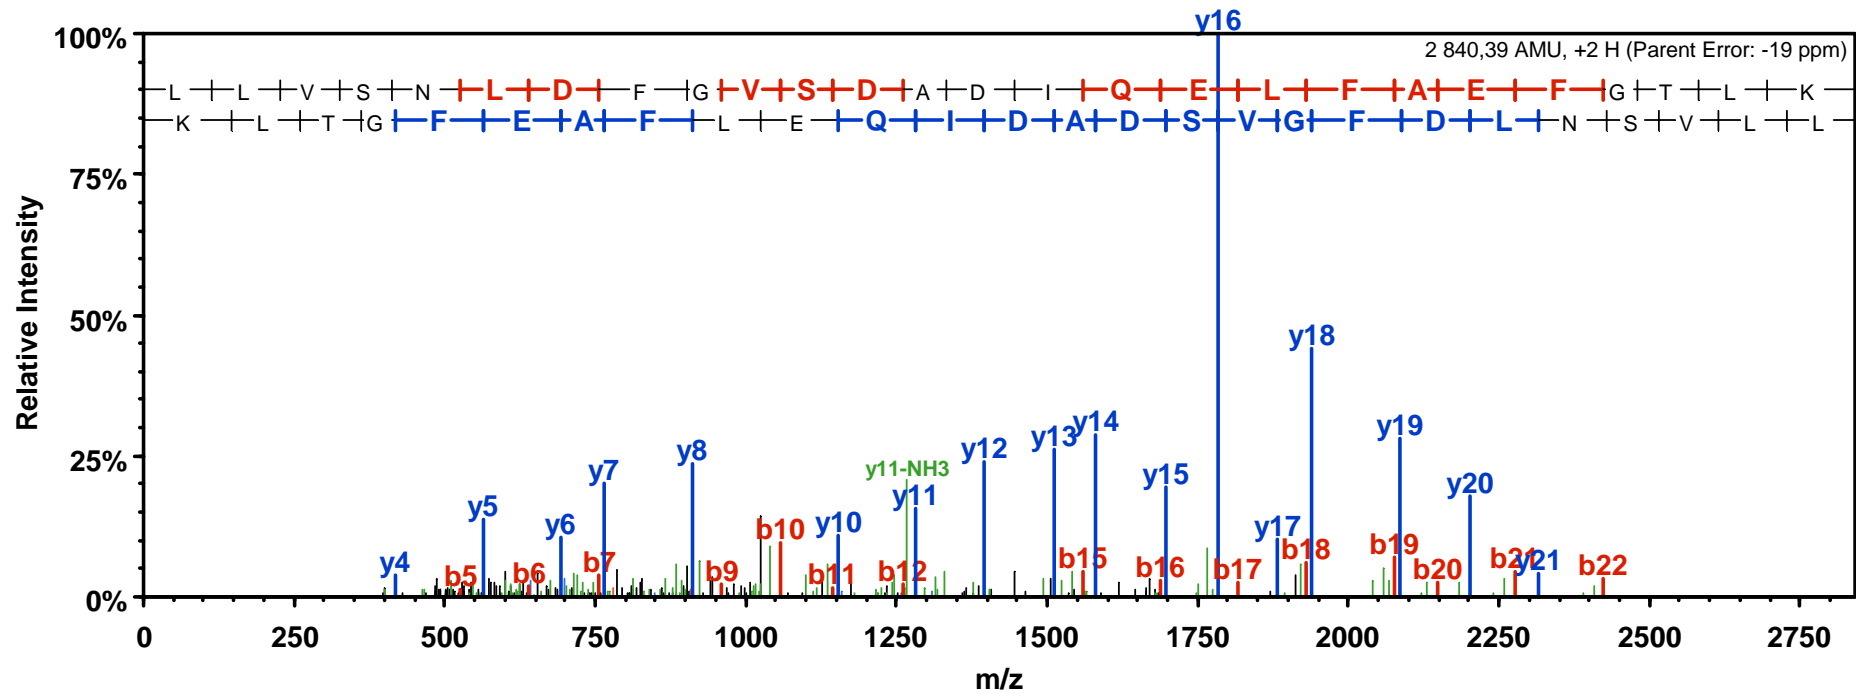

| Biological sample name | MS/MS sample name | Protein name                                 | Peptide sequence           | Mascot Ion score |
|------------------------|-------------------|----------------------------------------------|----------------------------|------------------|
| Chromofungin_14        | F011546 (F013446) | THO complex subunit 4 - Homo sapiens (Human) | LLVSNLDFGVSDADIQELFAEFGTLK | 143              |

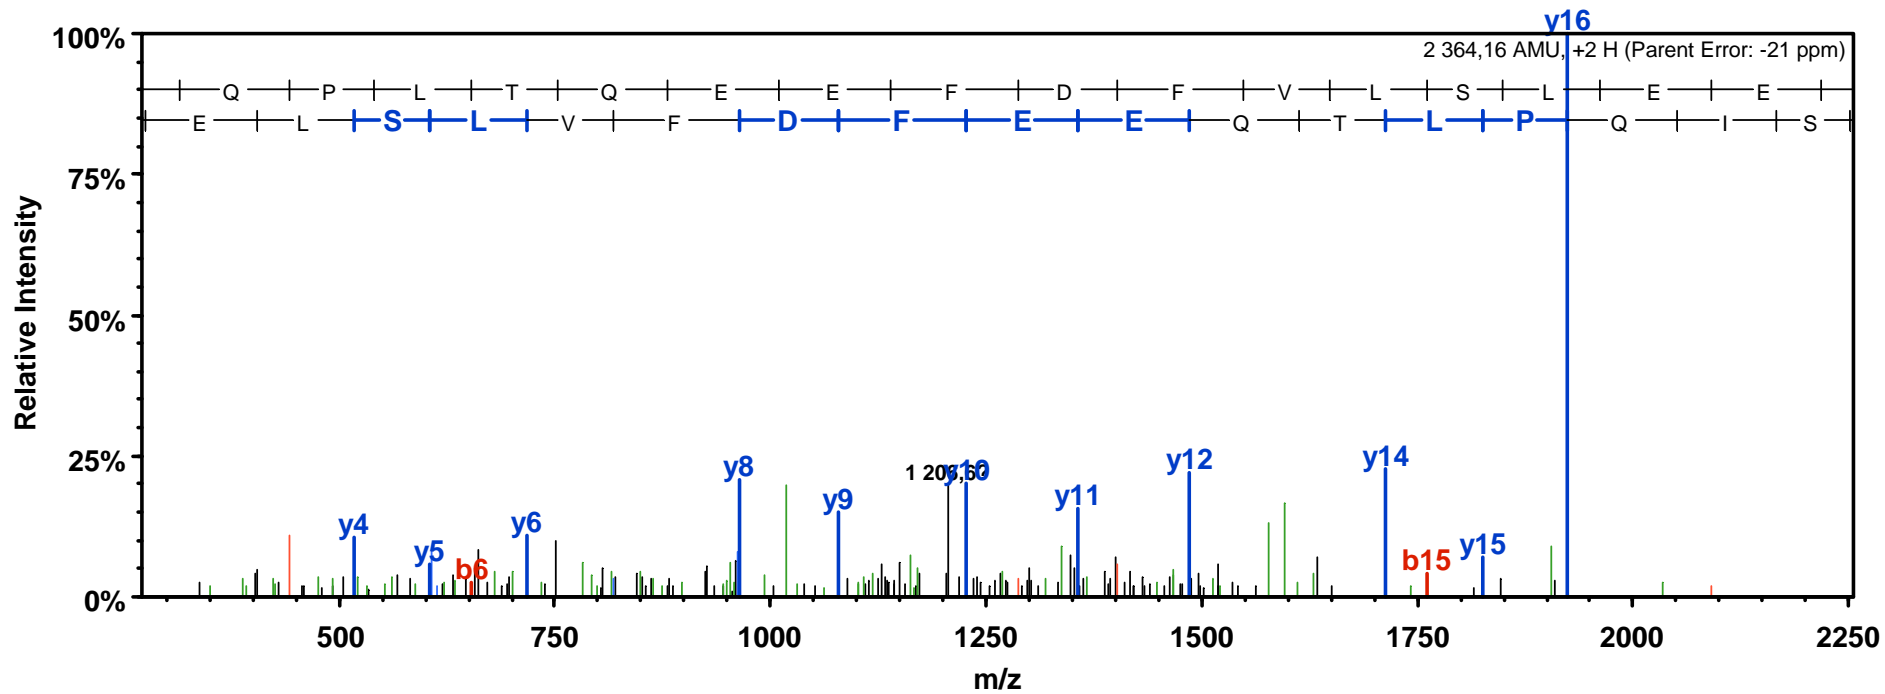

| Biological sample name | MS/MS sample name | Protein name                                       | Peptide sequence    | Mascot Ion score |
|------------------------|-------------------|----------------------------------------------------|---------------------|------------------|
| Chromofungin_14        | F011546 (F013446) | Thymocyte nuclear protein 1 - Homo sapiens (Human) | LSIQPLTQEEFDVLSLEEK | 69               |

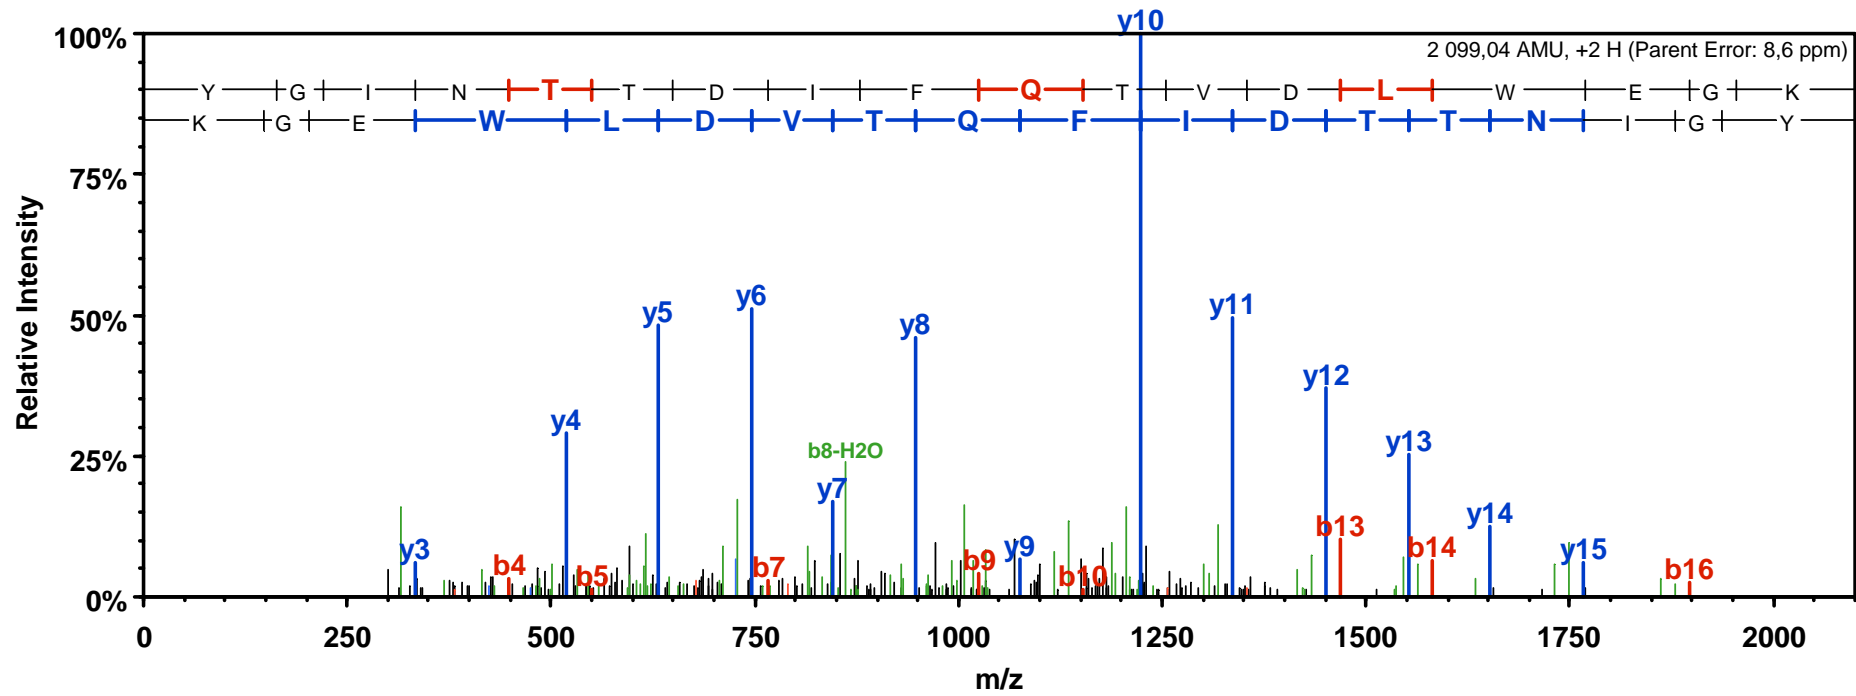

| Biological sample name | MS/MS sample name | Protein name                        | Peptide sequence   | Mascot Ion score |
|------------------------|-------------------|-------------------------------------|--------------------|------------------|
| Chromofungin_19        | F011550 (F013454) | Transgelin-2 - Homo sapiens (Human) | YGINTTDIFQTVDLWEGK | 101              |

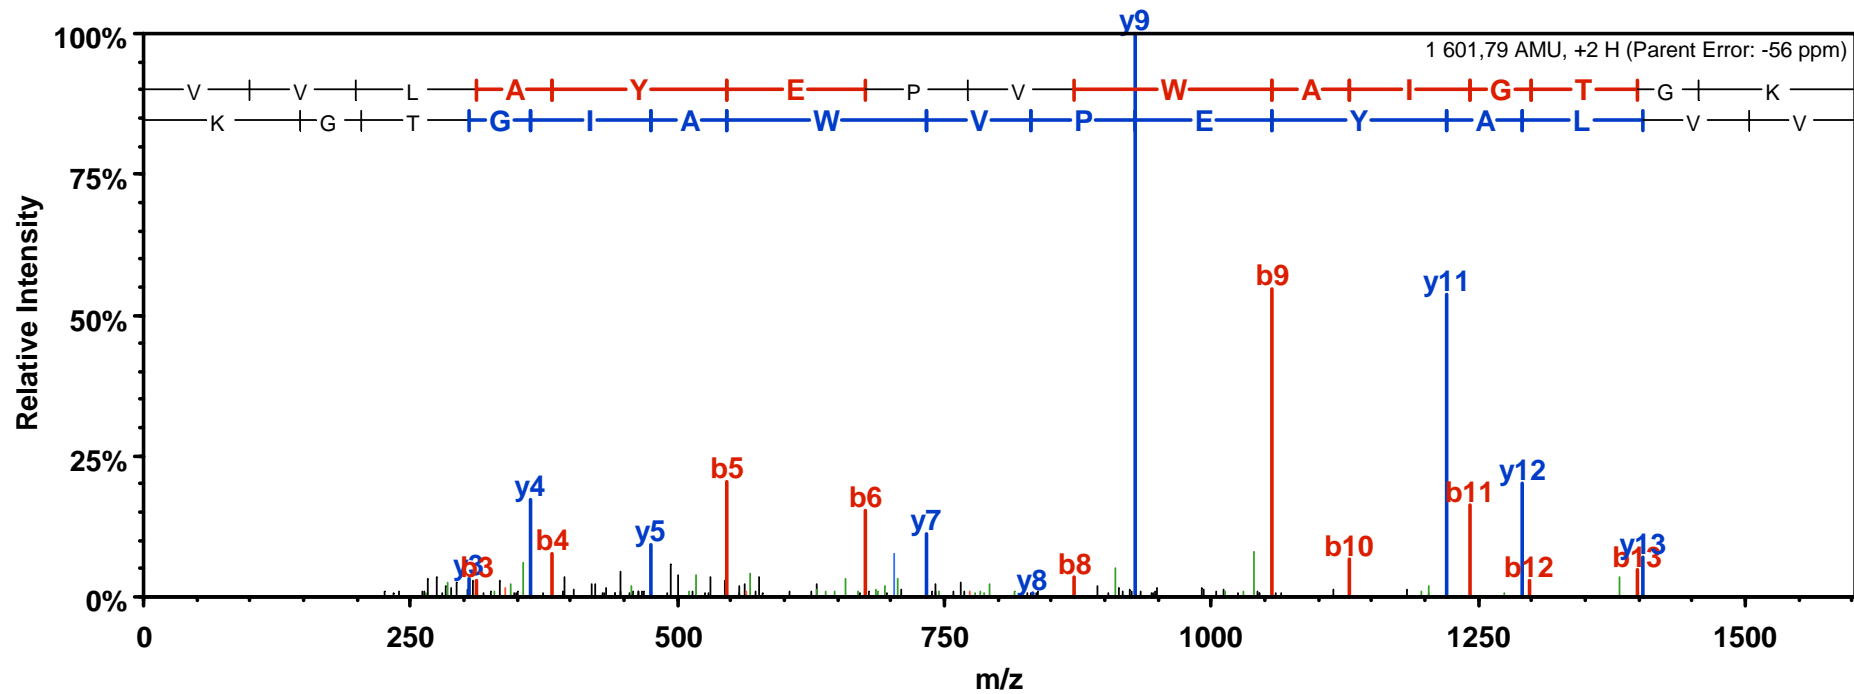

| Biological sample name | MS/MS sample name | Protein name                                     | Peptide sequence  | Mascot Ion score |
|------------------------|-------------------|--------------------------------------------------|-------------------|------------------|
| Chromofungin_19        | F011550 (F013454) | Triosephosphate isomerase - Homo sapiens (Human) | VVLAYEPVWAWAIGTGK | 89,9             |

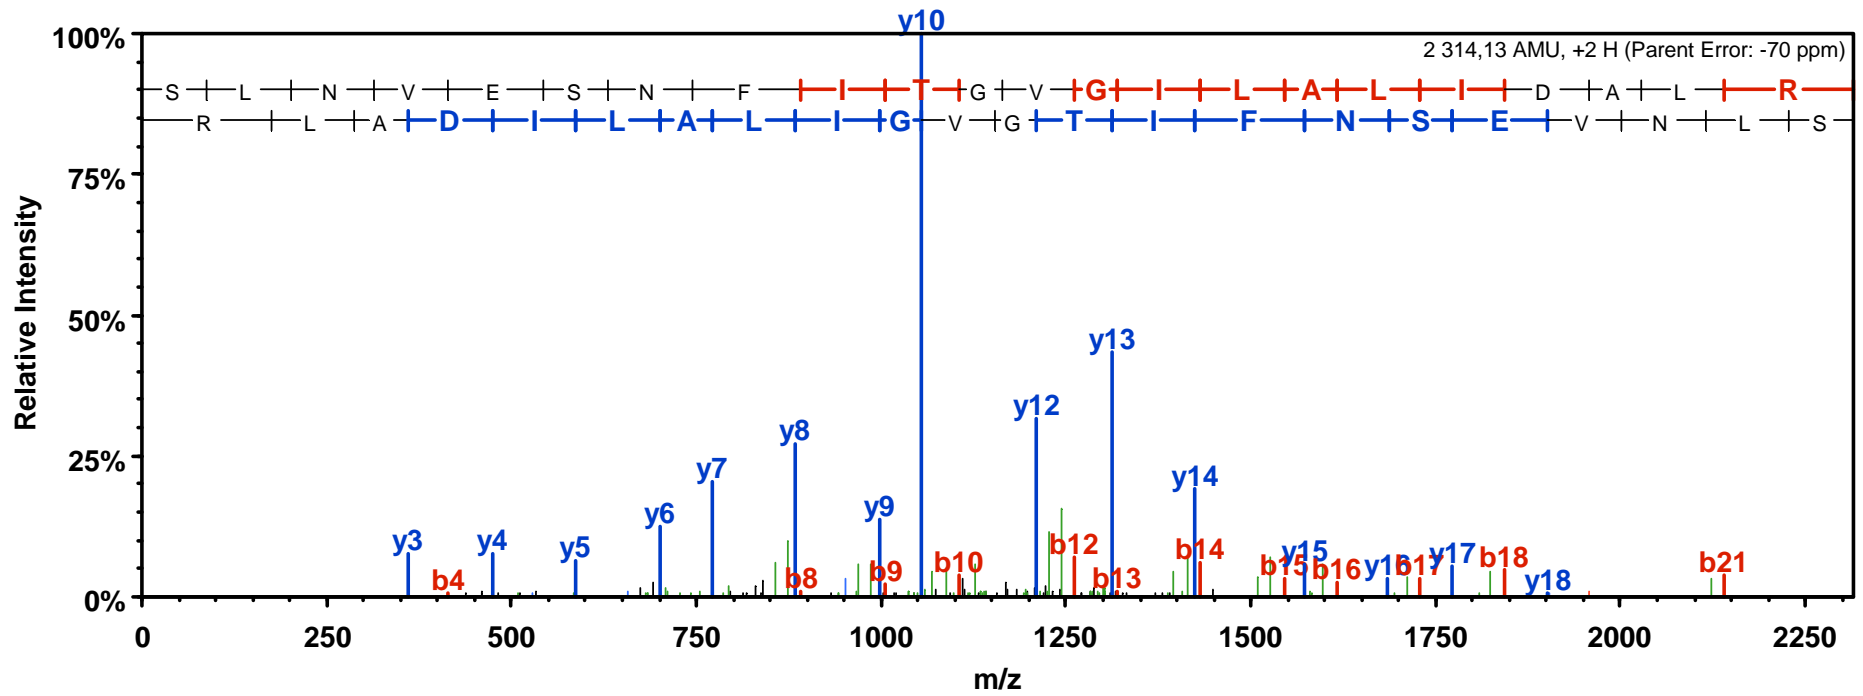

| Biological sample name | MS/MS sample name | Protein name                          | Peptide sequence        | Mascot Ion score |
|------------------------|-------------------|---------------------------------------|-------------------------|------------------|
| Chromofungin_19        | F011550 (F013454) | Tropomodulin-3 - Homo sapiens (Human) | SLNVESNFITGVIGILALIDALR | 122              |

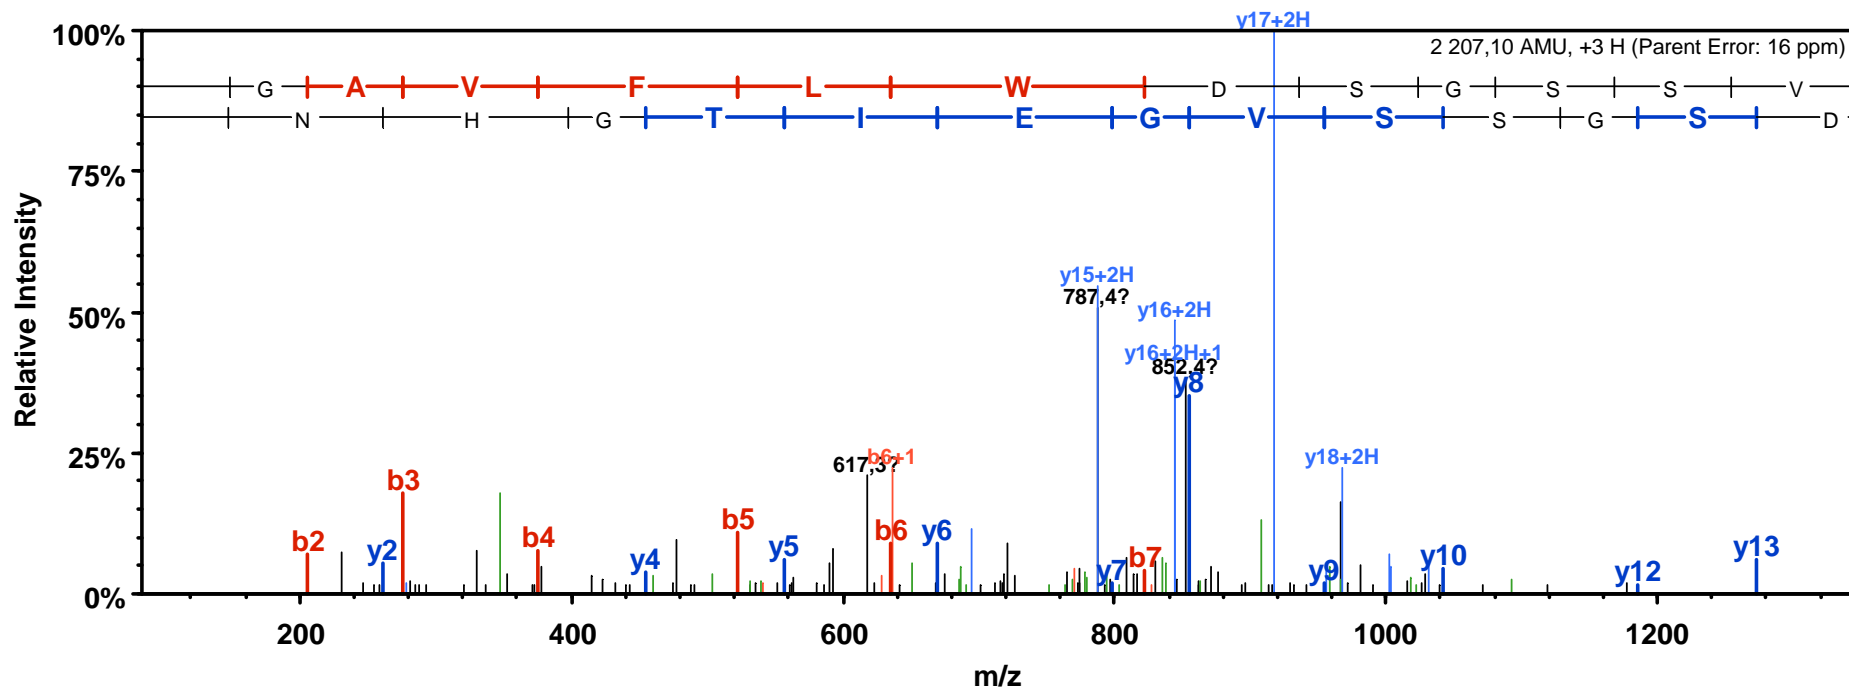

| Biological sample name | MS/MS sample name | Protein name                                          | Peptide sequence      | Mascot Ion score |
|------------------------|-------------------|-------------------------------------------------------|-----------------------|------------------|
| Chromofungin_14        | F011546 (F013446) | WD repeat-containing protein 1 - Homo sapiens (Human) | FGAVFLWDSGSSVGEITGHNK | 60,6             |

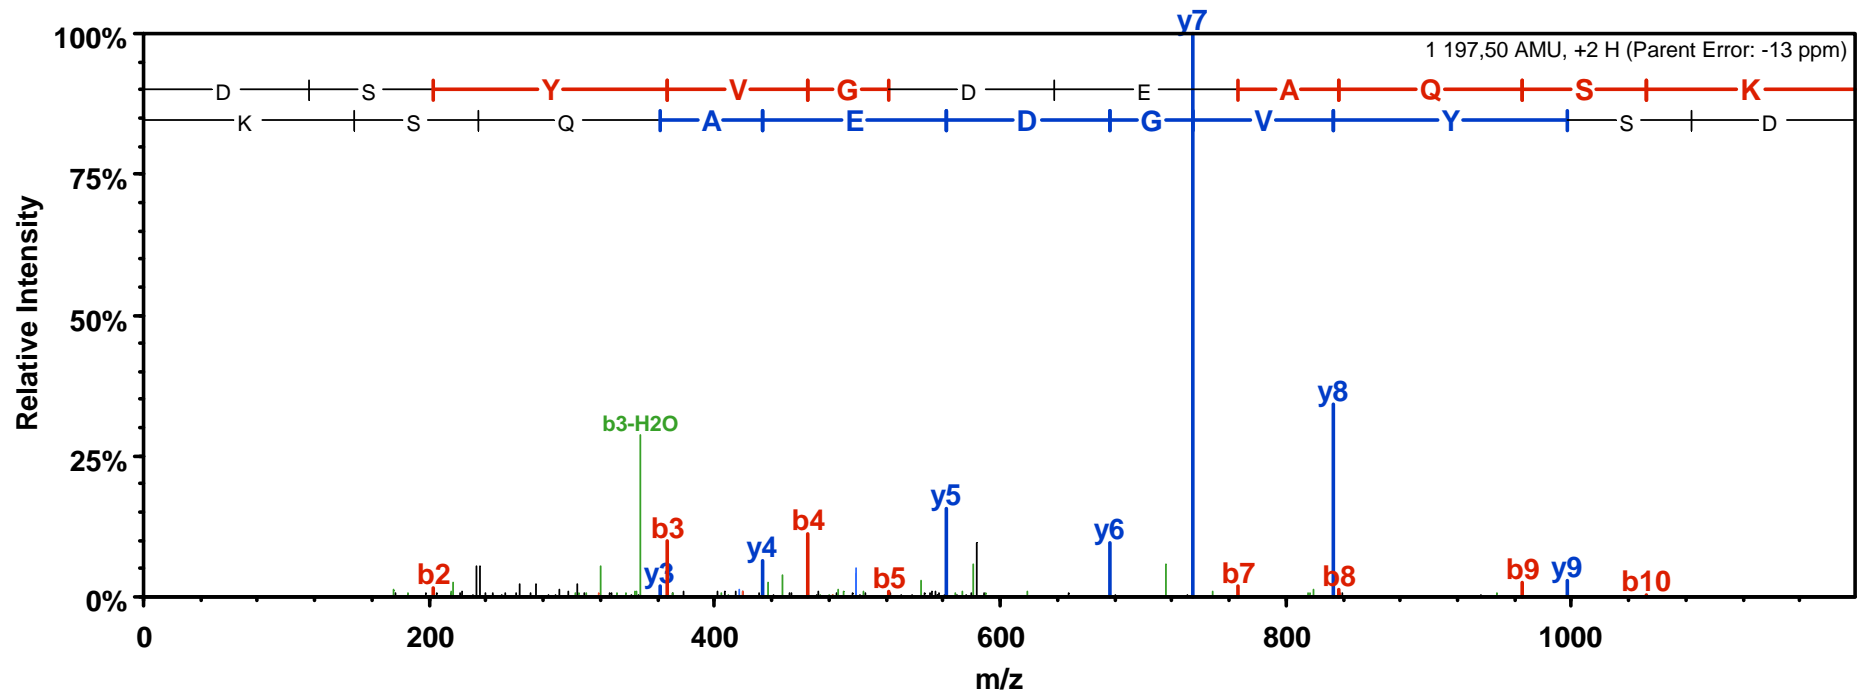

| Biological sample name | MS/MS sample name | Protein name                                | Peptide sequence | Mascot Ion score |
|------------------------|-------------------|---------------------------------------------|------------------|------------------|
| Castestatin_6          | F011558 (F013468) | Actin, cytoplasmic 1 - Homo sapiens (Human) | DSYVGDEAQSK      | 63,3             |



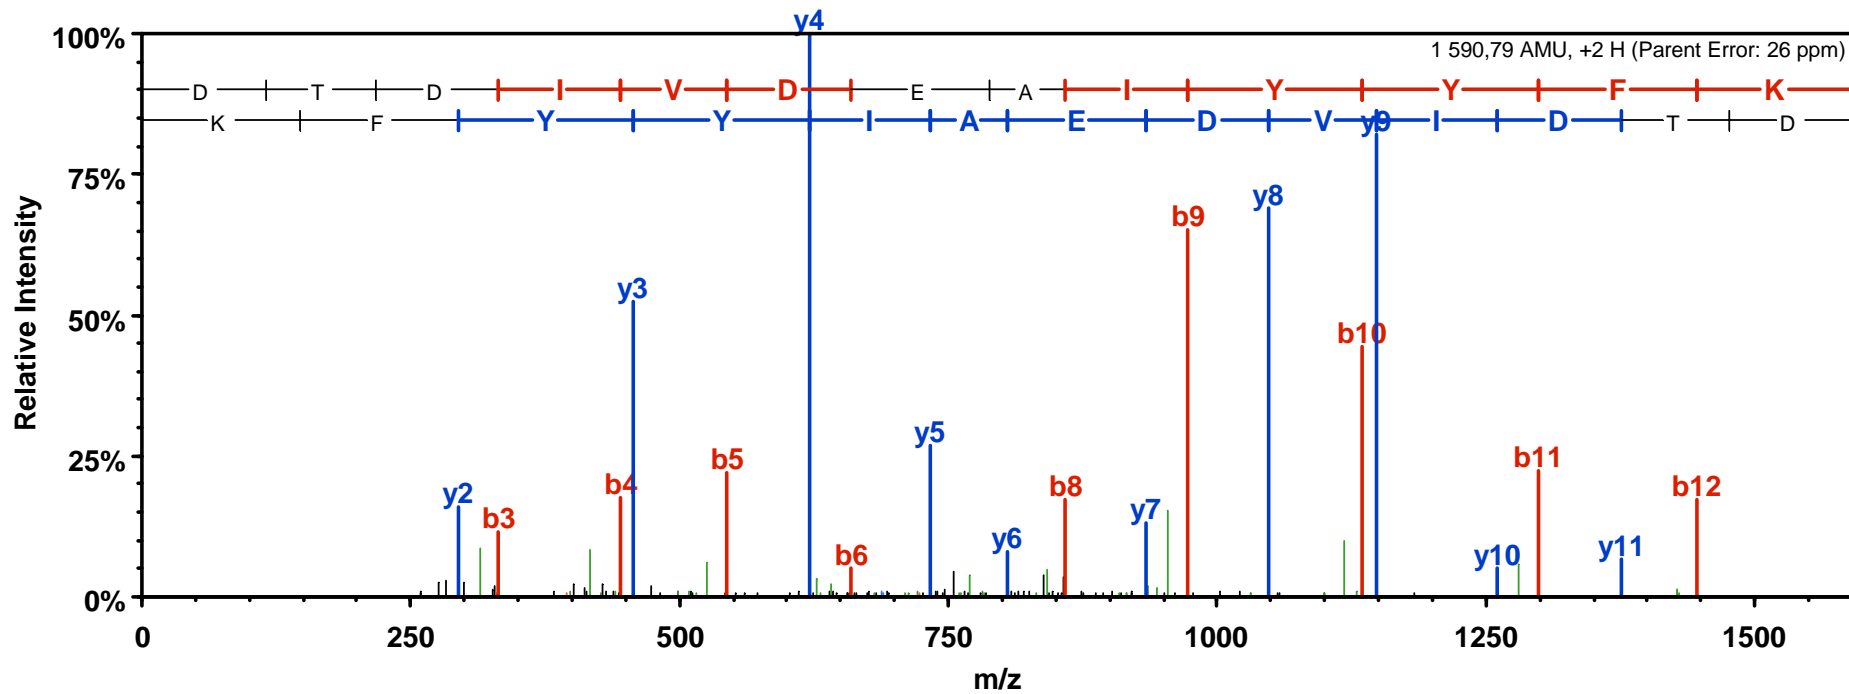

| Biological sample name | MS/MS sample name | Protein name                                                       | Peptide sequence | Mascot Ion score |
|------------------------|-------------------|--------------------------------------------------------------------|------------------|------------------|
| Castestatin_14         | F011566 (F013485) | Actin-related protein 2/3 complex subunit 3 - Homo sapiens (Human) | DTDIVDEAIYYFK    | 97,4             |

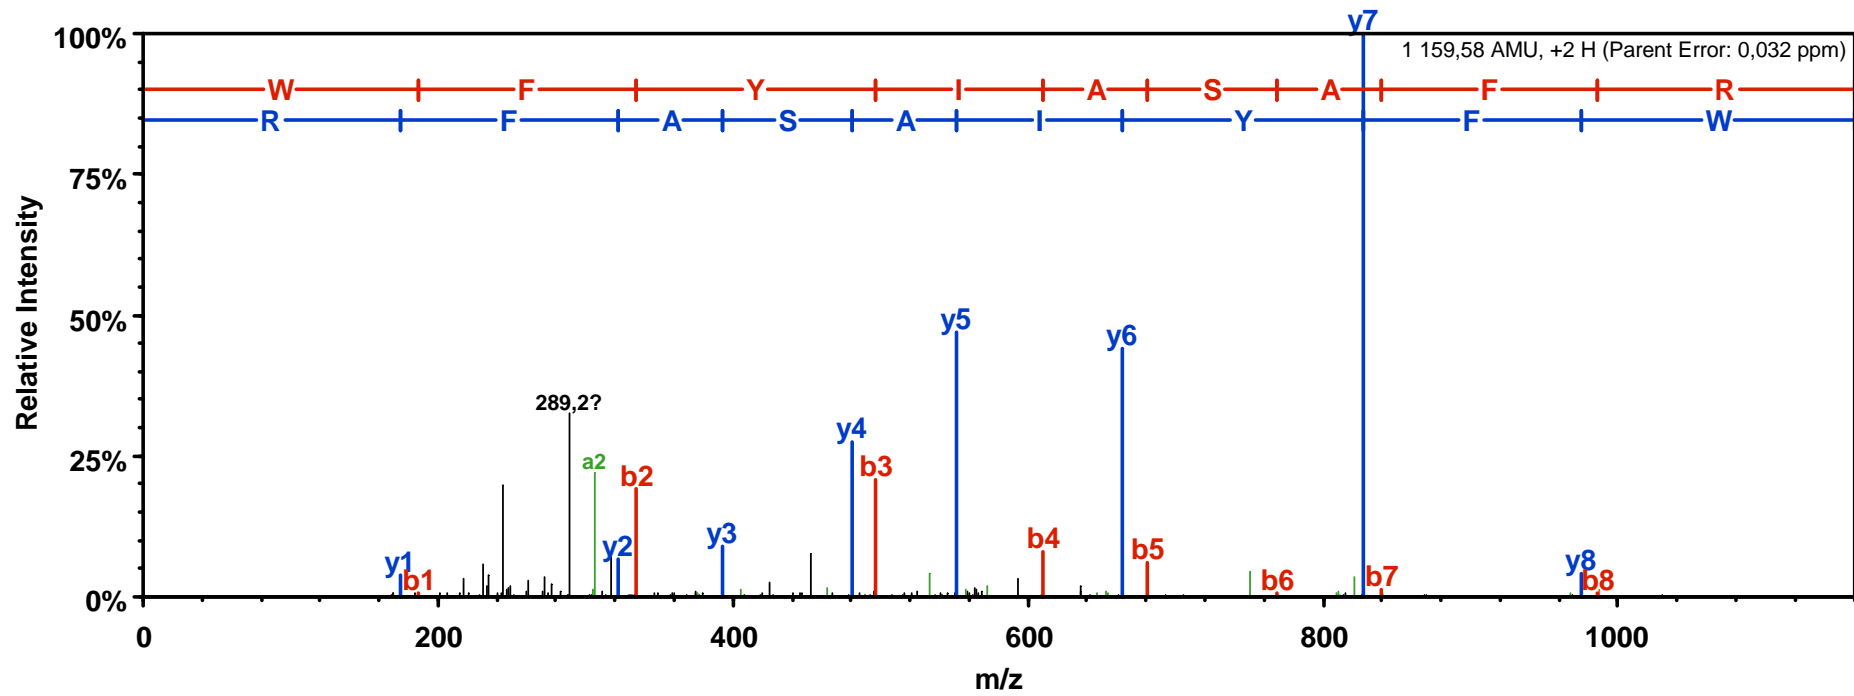

| Biological sample name | MS/MS sample name | Protein name                                                 | Peptide sequence | Mascot Ion score |
|------------------------|-------------------|--------------------------------------------------------------|------------------|------------------|
| Castestatin_11         | F011563 (F013479) | Alpha-1-acid glycoprotein 1 precursor - Homo sapiens (Human) | WFYIASAFR        | 54,1             |

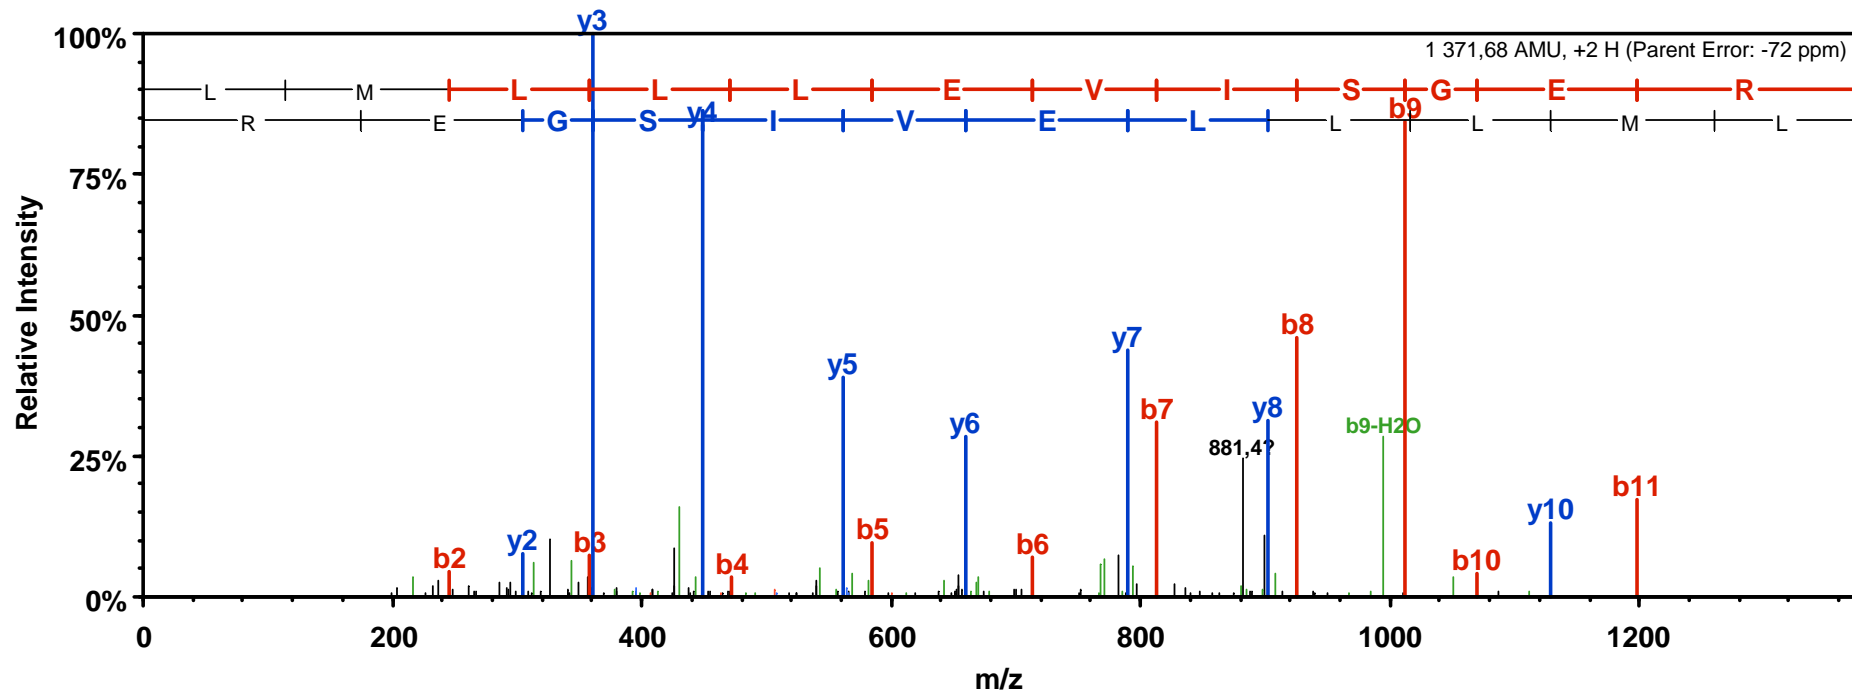

| Biological sample name | MS/MS sample name | Protein name                           | Peptide sequence | Mascot Ion score |
|------------------------|-------------------|----------------------------------------|------------------|------------------|
| Castestatin_16         | F011568 (F013490) | Alpha-actinin-1 - Homo sapiens (Human) | LMLLLEVISGER     | 72,9             |

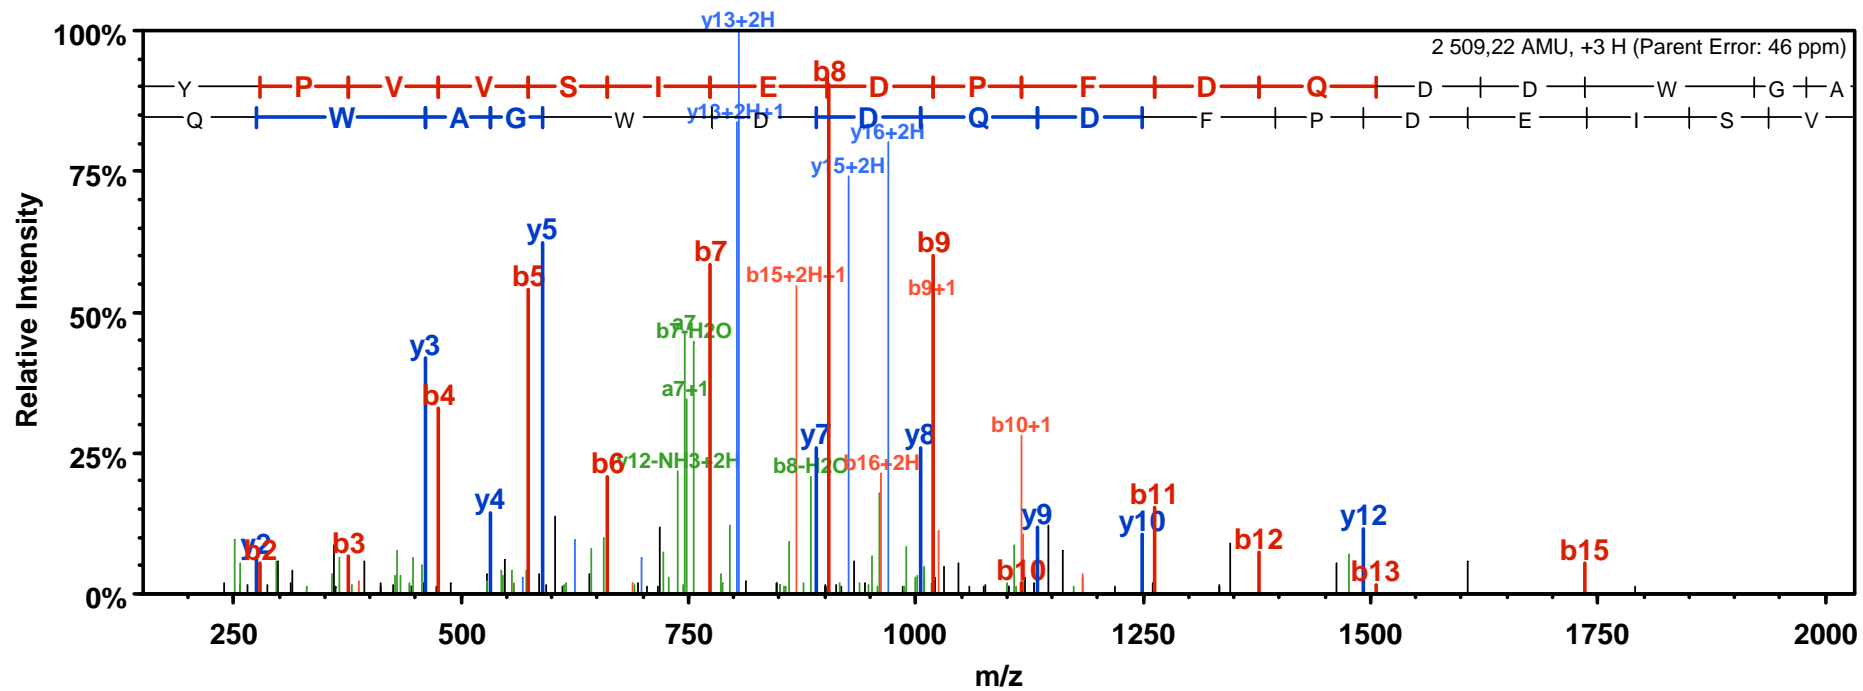

| Biological sample name | MS/MS sample name | Protein name                         | Peptide sequence     | Mascot Ion score |
|------------------------|-------------------|--------------------------------------|----------------------|------------------|
| Castestatin_14         | F011566 (F013485) | Alpha-enolase - Homo sapiens (Human) | DYPVVSIEDPFDQDDWGWQA | 84,6             |

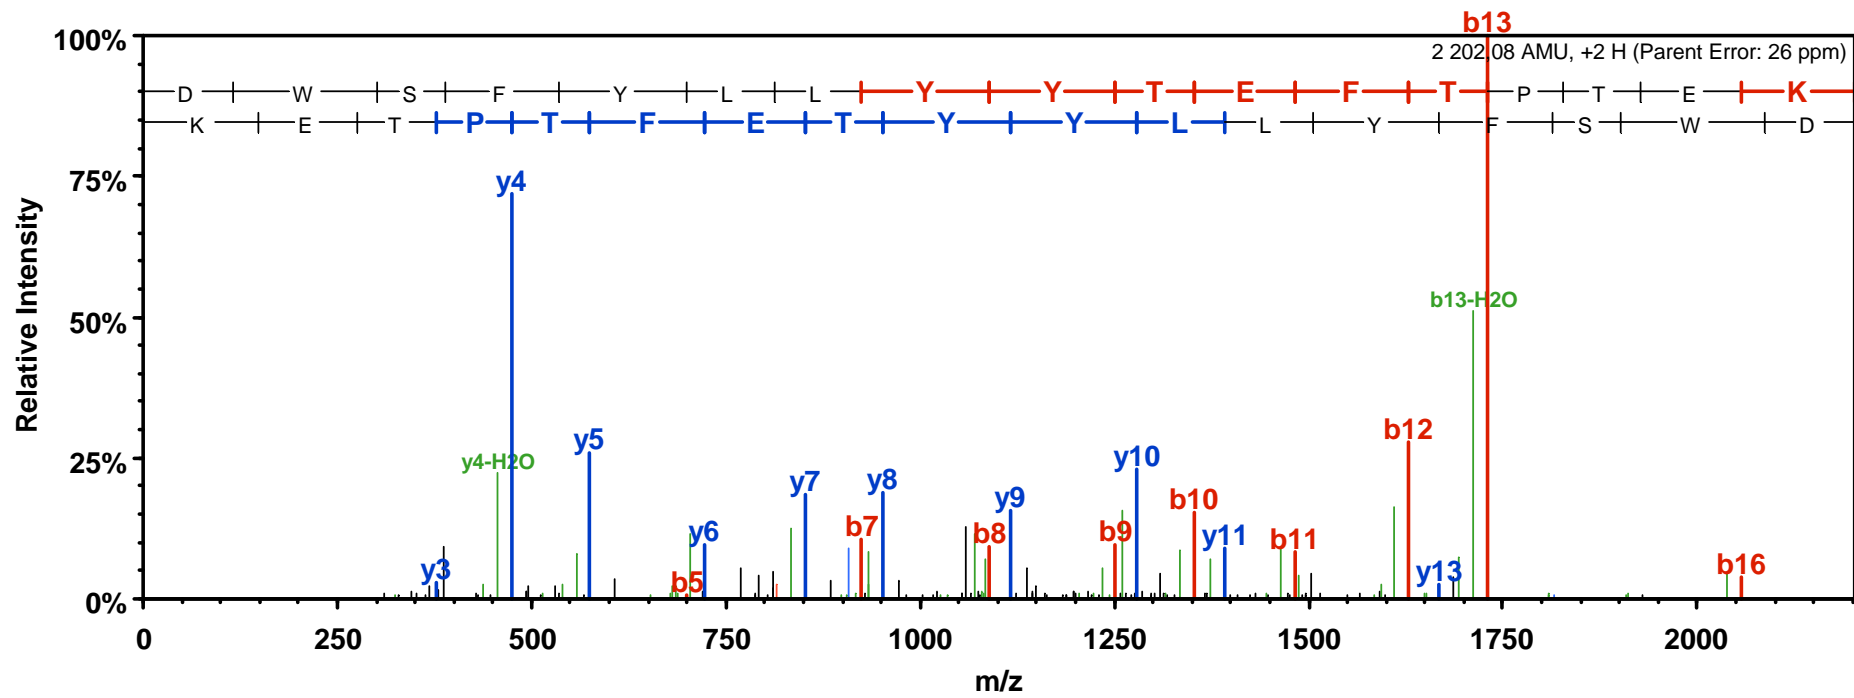

| Biological sample name | MS/MS sample name | Protein name                                                                                             | Peptide sequence | Mascot Ion score |
|------------------------|-------------------|----------------------------------------------------------------------------------------------------------|------------------|------------------|
| Castestatin_11         | F011563 (F013479) | Beta-2-microglobulin precursor<br>[Contains: Beta-2-microglobulin form pl<br>5.3] - Homo sapiens (Human) | DWSFYLLYYTEFTPEK | 62,4             |

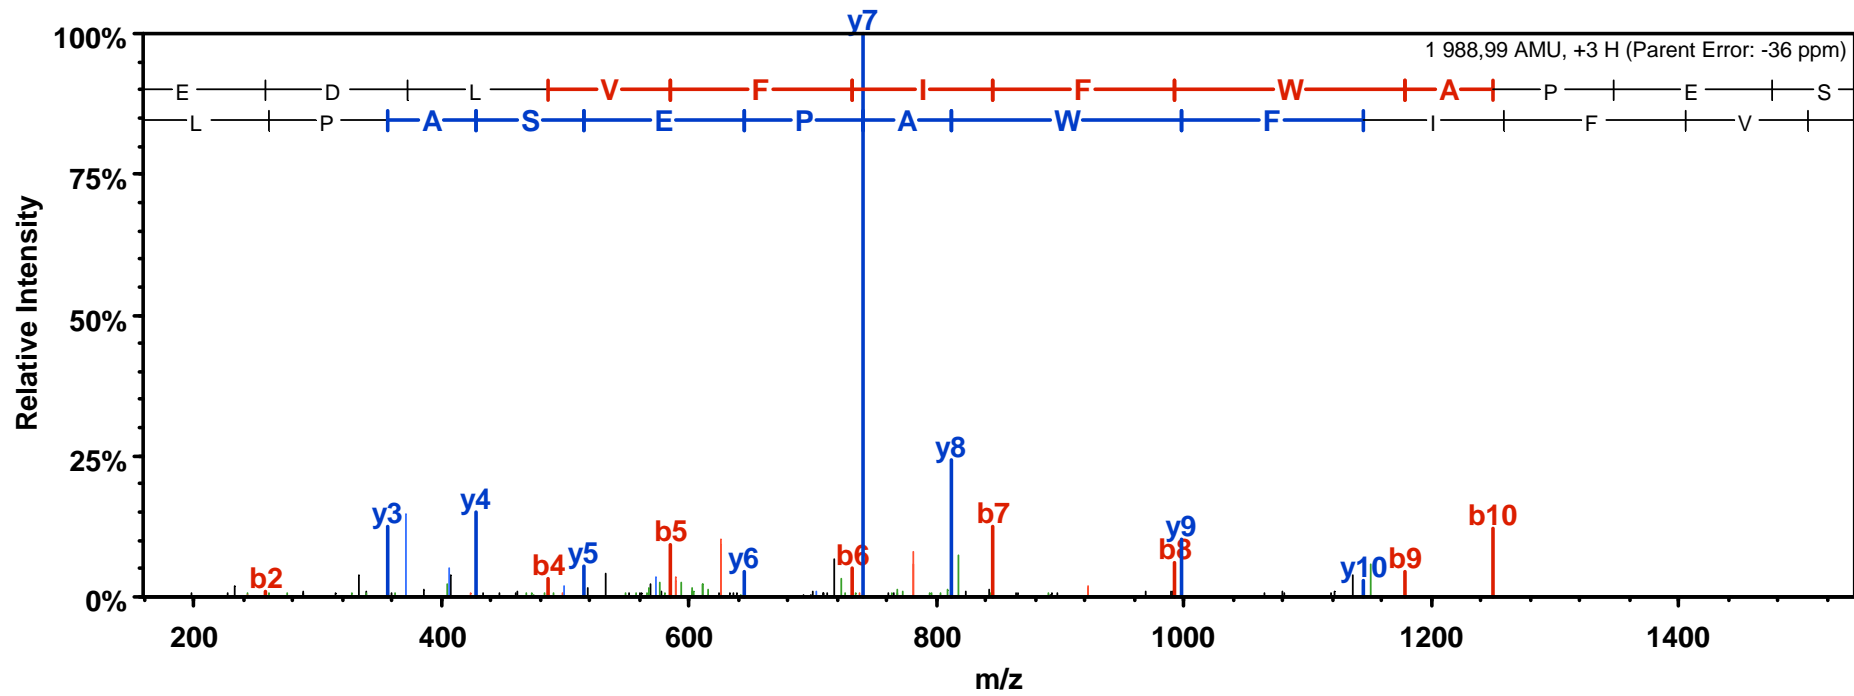

| Biological sample name | MS/MS sample name | Protein name                     | Peptide sequence  | Mascot Ion score |
|------------------------|-------------------|----------------------------------|-------------------|------------------|
| Castestatin_12         | F011564 (F013481) | Cofilin-1 - Homo sapiens (Human) | KEDLVFIFWAPESAPLK | 56,9             |

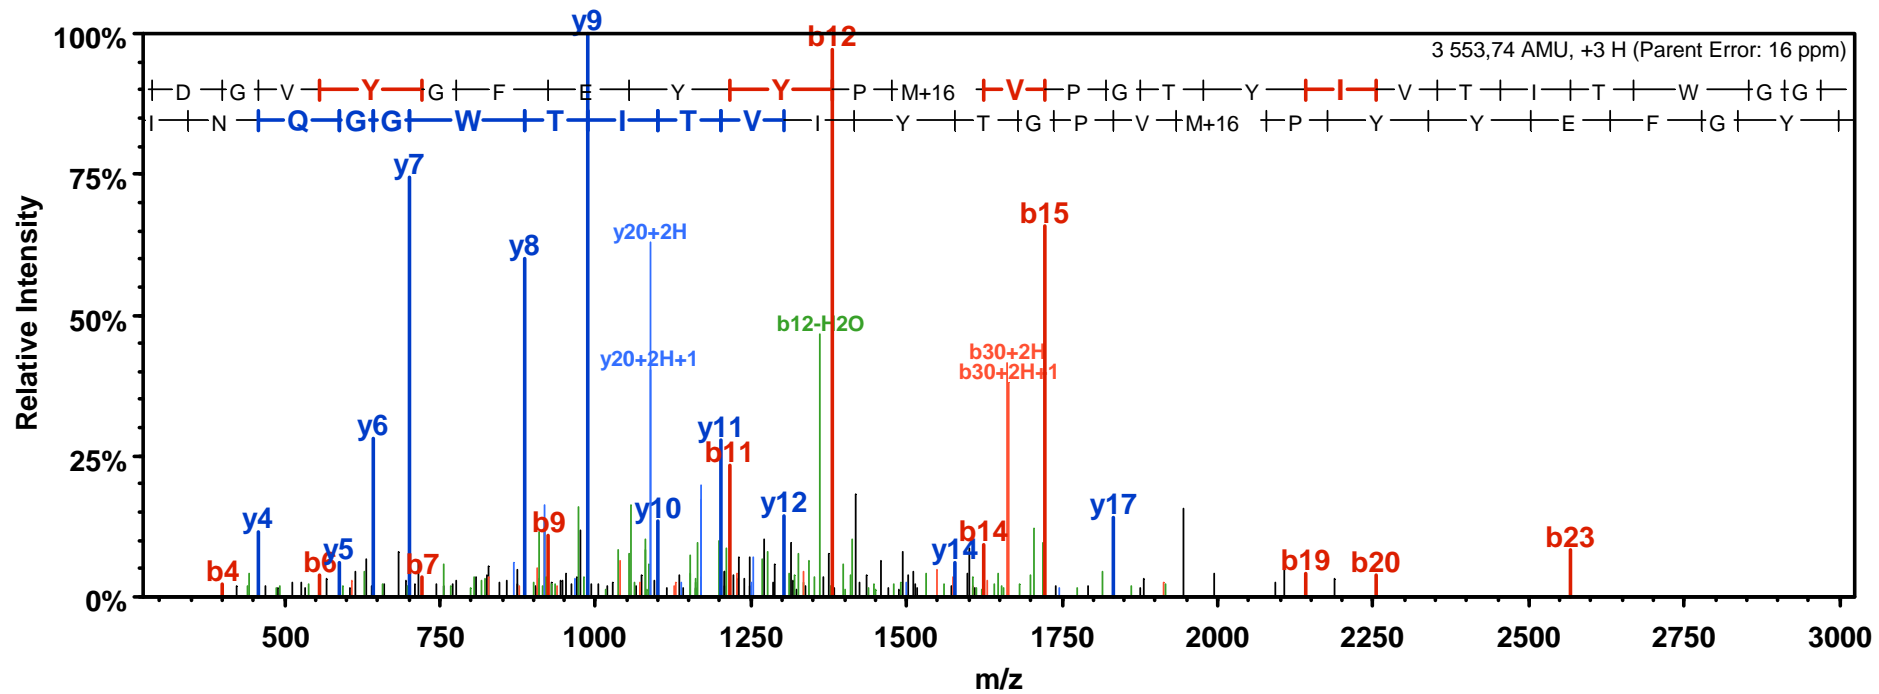

| Biological sample name | MS/MS sample name | Protein name                     | Peptide sequence                                           | Mascot Ion score |
|------------------------|-------------------|----------------------------------|------------------------------------------------------------|------------------|
| Castestatin_11         | F011563 (F013479) | Filamin-A - Homo sapiens (Human) | DLG DGVYGF EY YP M+16 V P G T Y I V T I T W G G<br>GGQNIGR | 63,9             |

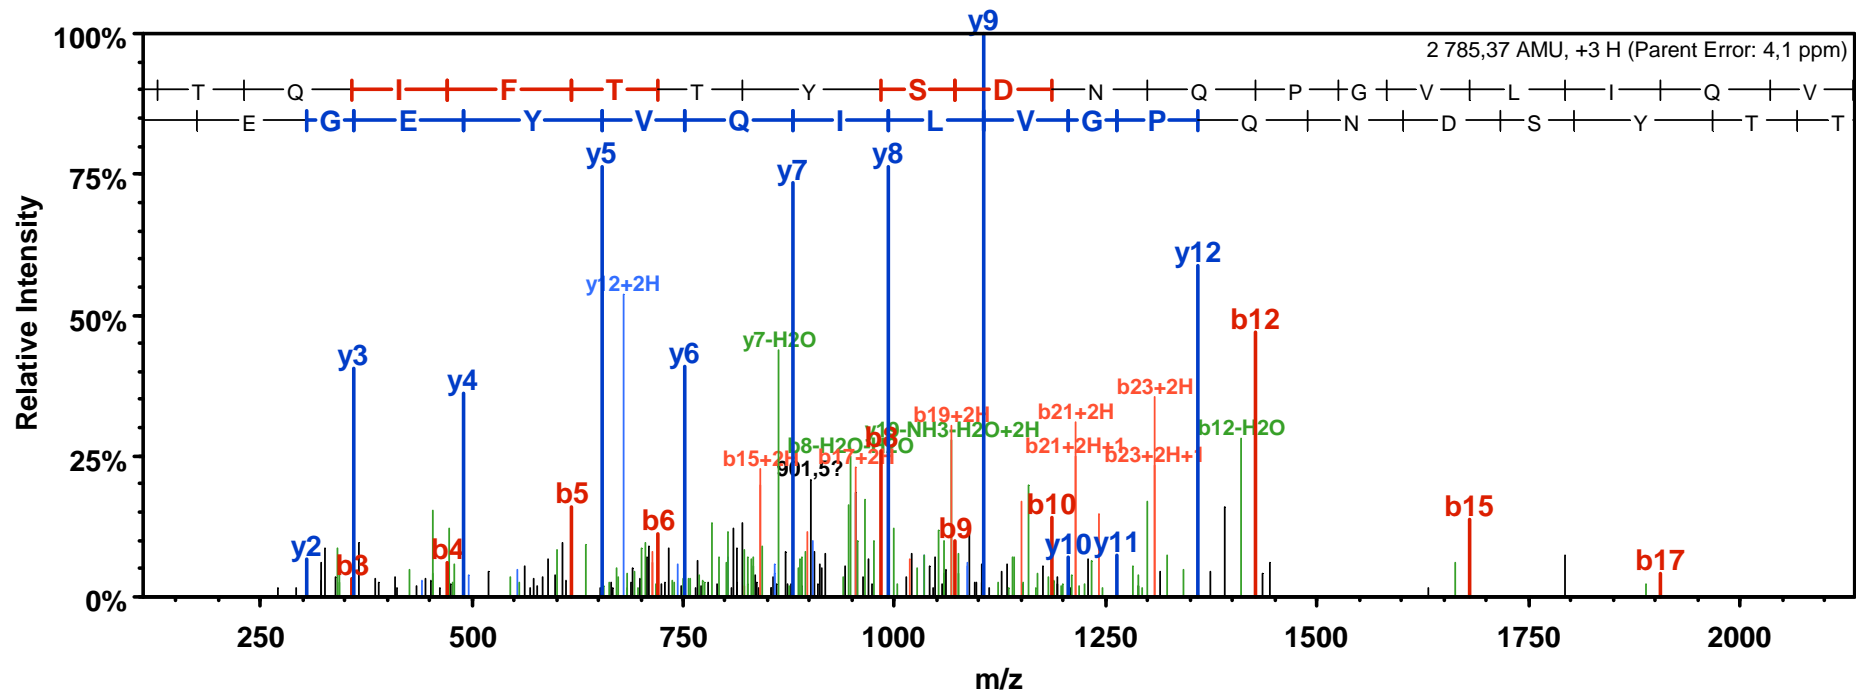

| Biological sample name | MS/MS sample name | Protein name                                       | Peptide sequence          | Mascot Ion score |
|------------------------|-------------------|----------------------------------------------------|---------------------------|------------------|
| Castestatin_13         | F011565 (F013483) | Heat shock 70 kDa protein 1 - Homo sapiens (Human) | QTQIFTTYSVDNQPGLVLIQVYEGE | 69,3             |



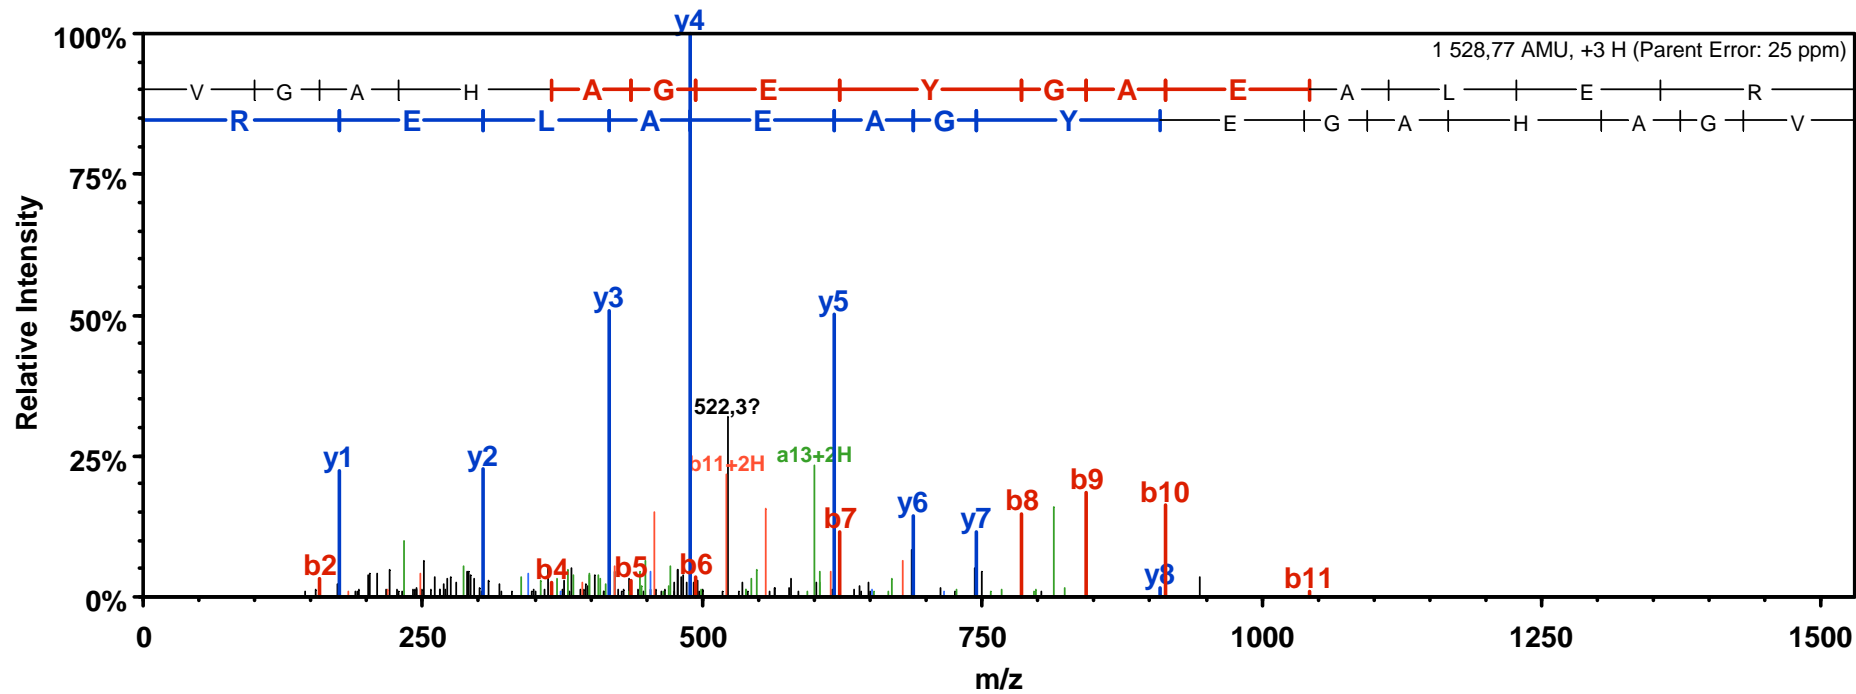

| Biological sample name | MS/MS sample name | Protein name                                    | Peptide sequence | Mascot Ion score |
|------------------------|-------------------|-------------------------------------------------|------------------|------------------|
| Castestatin_8          | F011560 (F013472) | Hemoglobin subunit alpha - Homo sapiens (Human) | VGAHAGEYGAELER   | 56,6             |

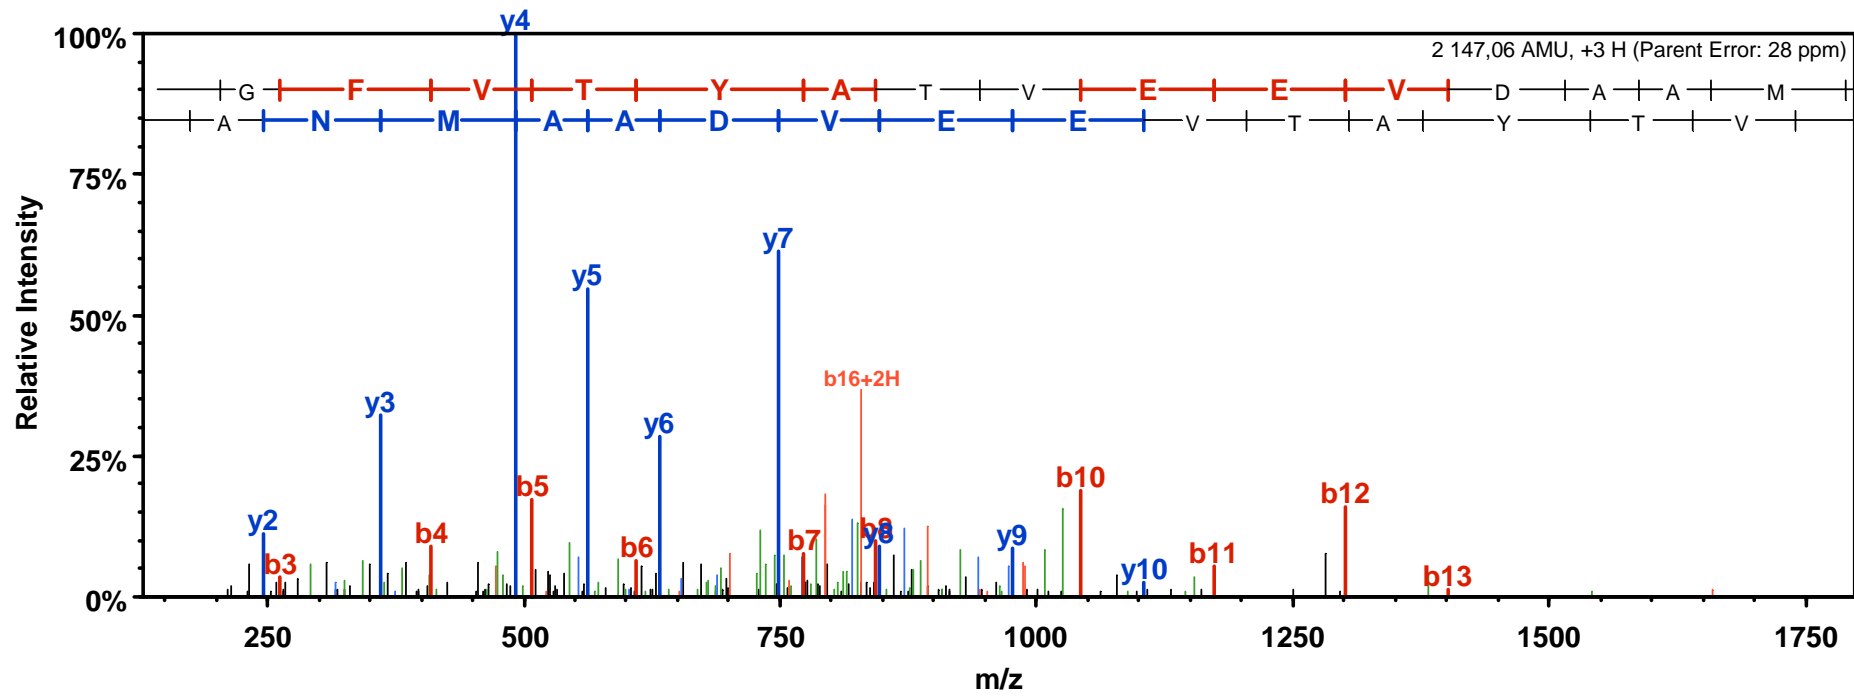

| Biological sample name | MS/MS sample name | Protein name                                                      | Peptide sequence      | Mascot Ion score |
|------------------------|-------------------|-------------------------------------------------------------------|-----------------------|------------------|
| Castestatin_11         | F011563 (F013479) | Heterogeneous nuclear ribonucleoprotein A1 - Homo sapiens (Human) | GFGFV TYATVEEVDAAMNAR | 64,4             |

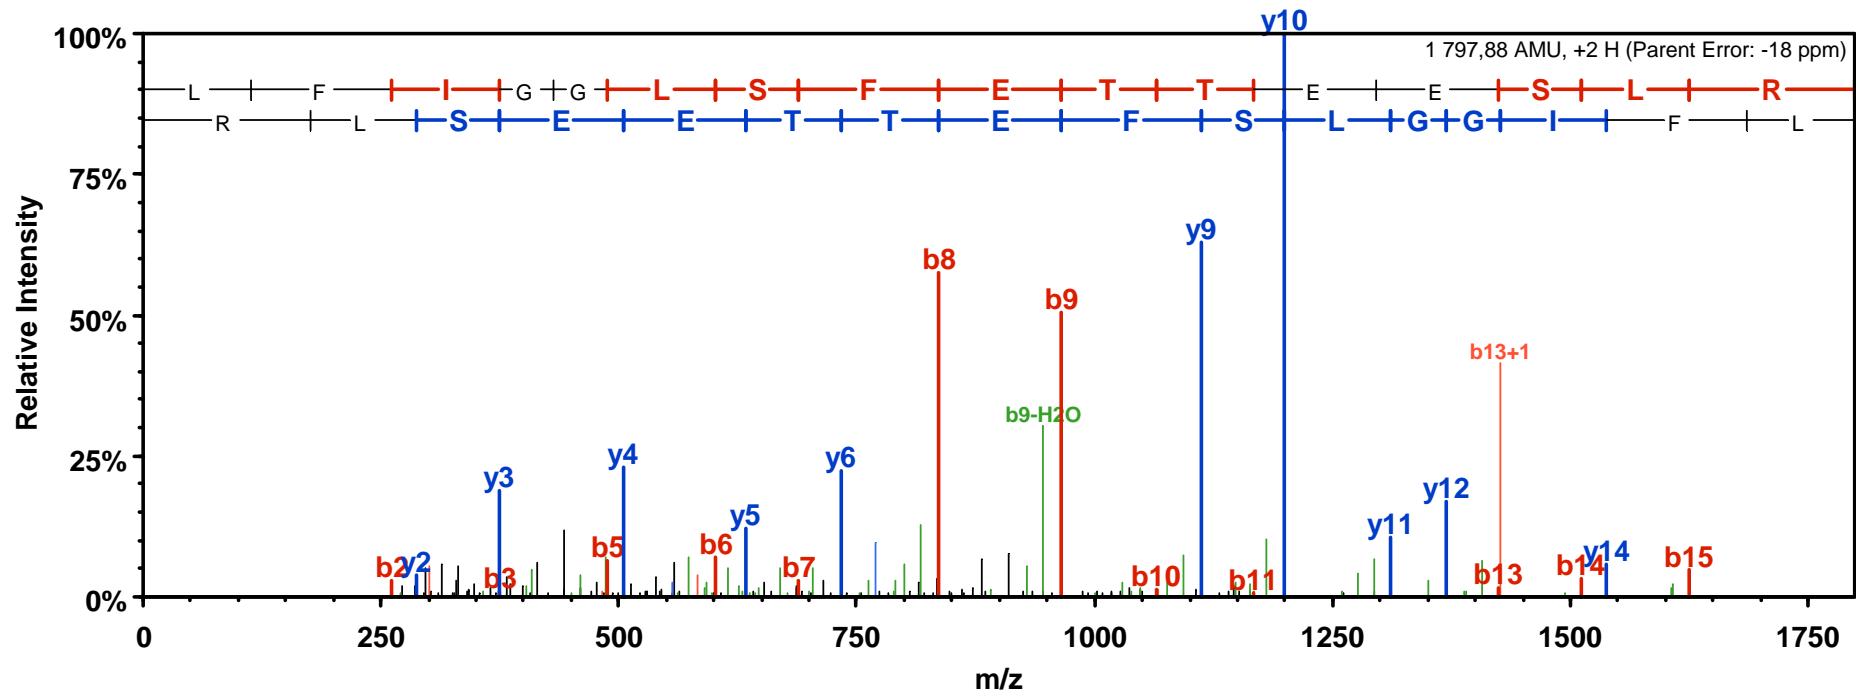

| Biological sample name | MS/MS sample name | Protein name                                                          | Peptide sequence | Mascot Ion score |
|------------------------|-------------------|-----------------------------------------------------------------------|------------------|------------------|
| Castestatin_12         | F011564 (F013481) | Heterogeneous nuclear ribonucleoproteins A2/B1 - Homo sapiens (Human) | LFIGGLSFETTEESLR | 113              |

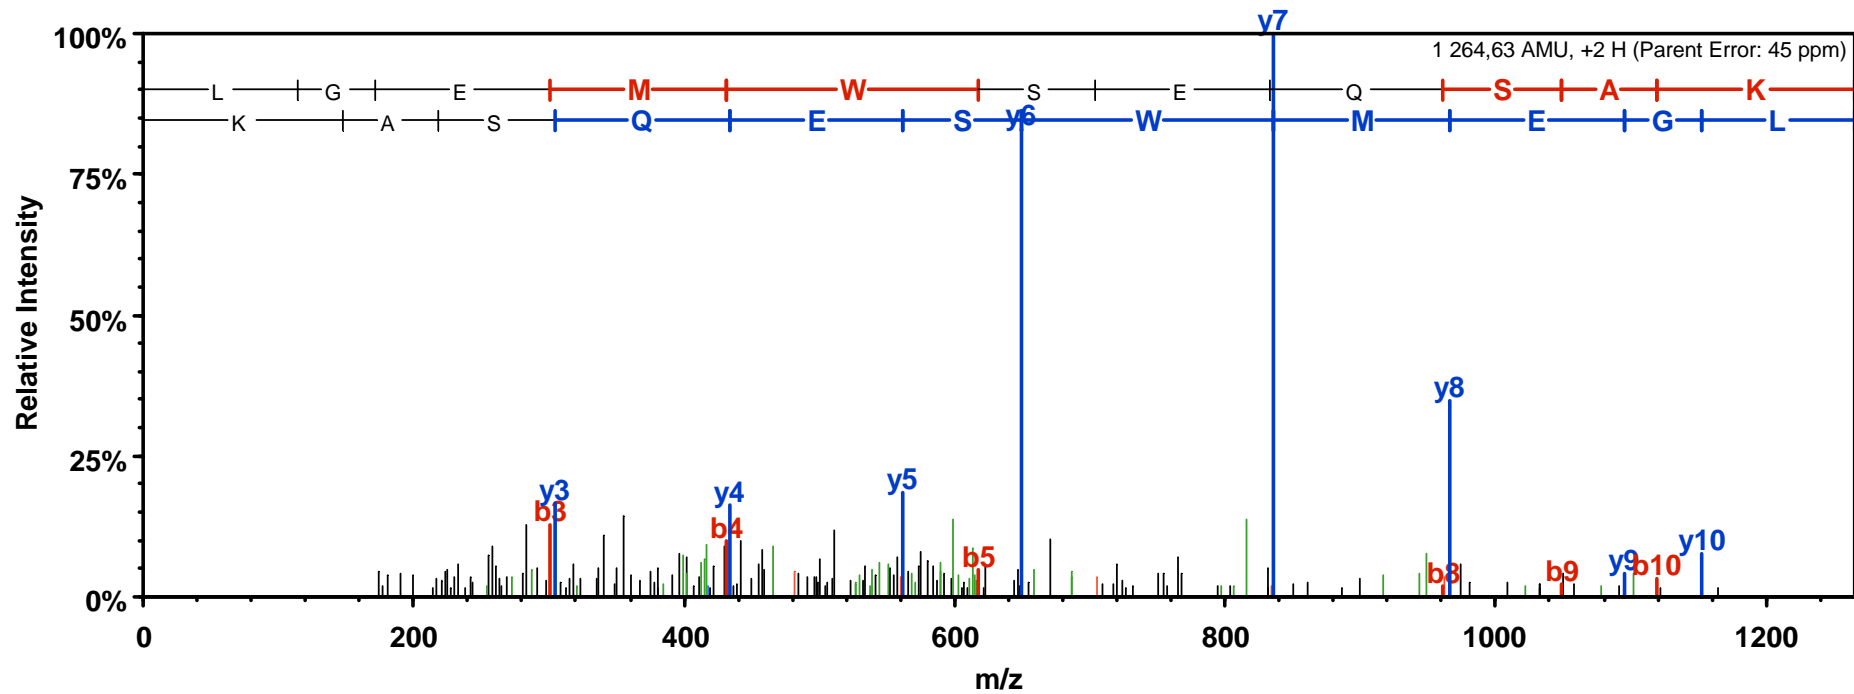

| Biological sample name | MS/MS sample name | Protein name                                          | Peptide sequence | Mascot Ion score |
|------------------------|-------------------|-------------------------------------------------------|------------------|------------------|
| Castestatin_10         | F011562 (F013477) | High mobility group protein B2 - Homo sapiens (Human) | LGEMWSEQSAK      | 57,1             |

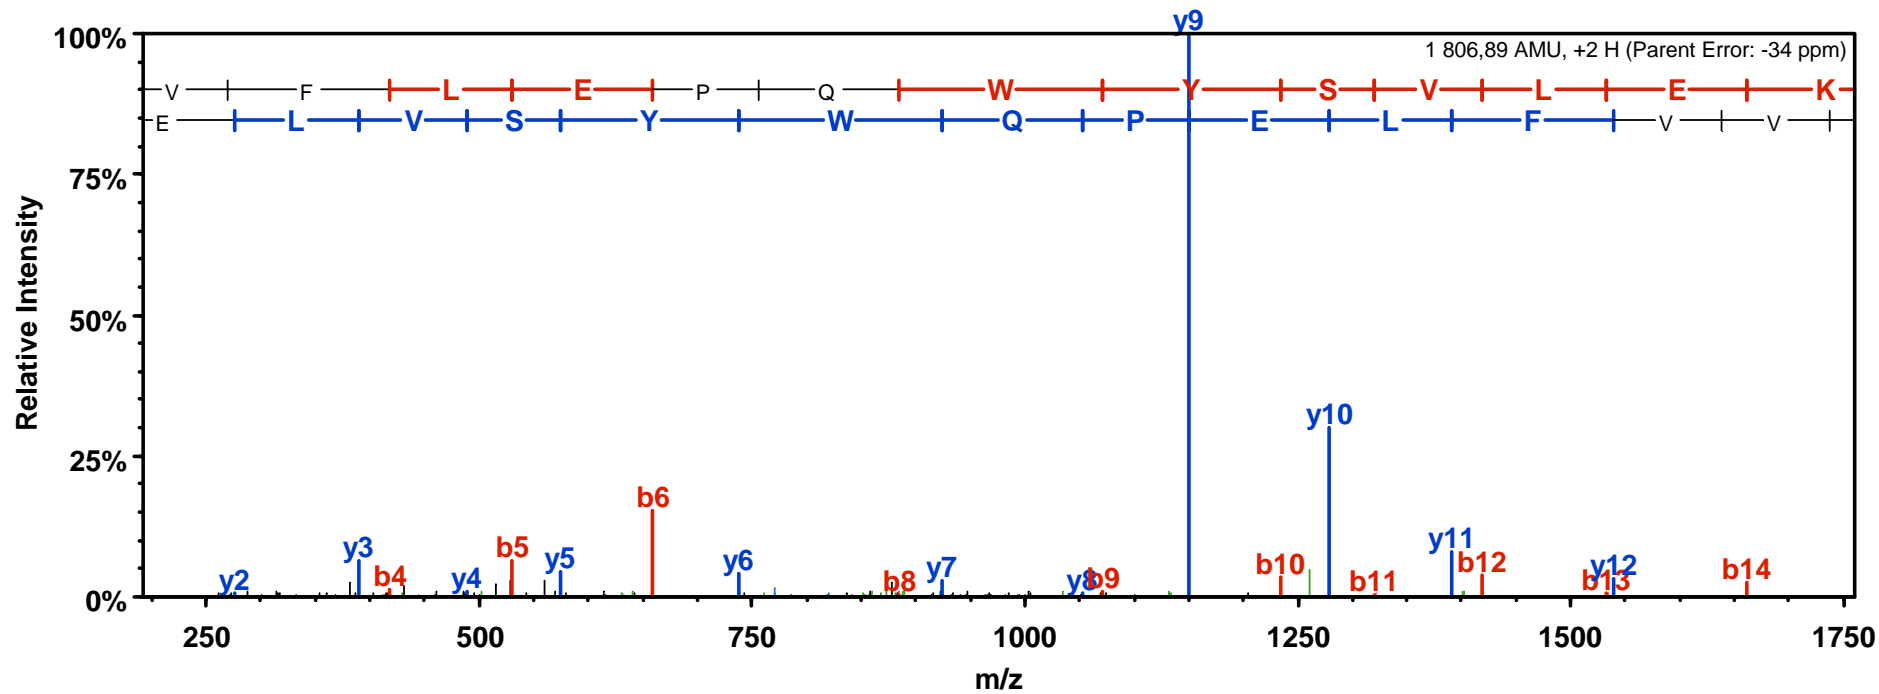

| Biological sample name | MS/MS sample name | Protein name                                                                                | Peptide sequence | Mascot Ion score |
|------------------------|-------------------|---------------------------------------------------------------------------------------------|------------------|------------------|
| Castestatin_11         | F011563 (F013479) | Low affinity immunoglobulin gamma Fc region receptor III-B precursor - Homo sapiens (Human) | AVVFLEPQWYSLVLEK | 60,5             |

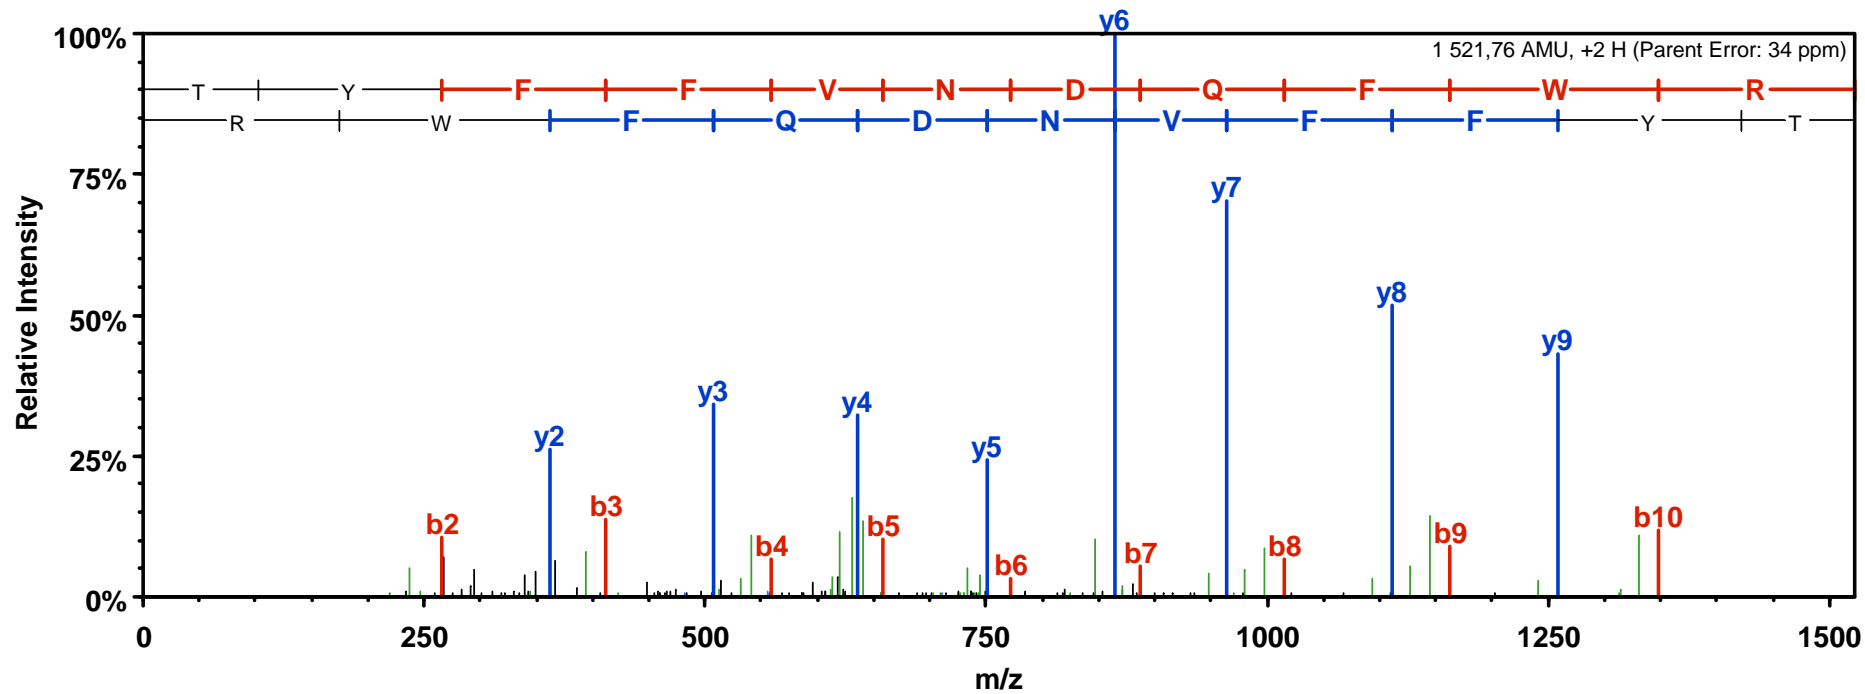

| Biological sample name | MS/MS sample name | Protein name                                            | Peptide sequence | Mascot Ion score |
|------------------------|-------------------|---------------------------------------------------------|------------------|------------------|
| Castestatin_15         | F011567 (F013488) | Neutrophil collagenase precursor - Homo sapiens (Human) | TYFFVNDQFWR      | 84,7             |

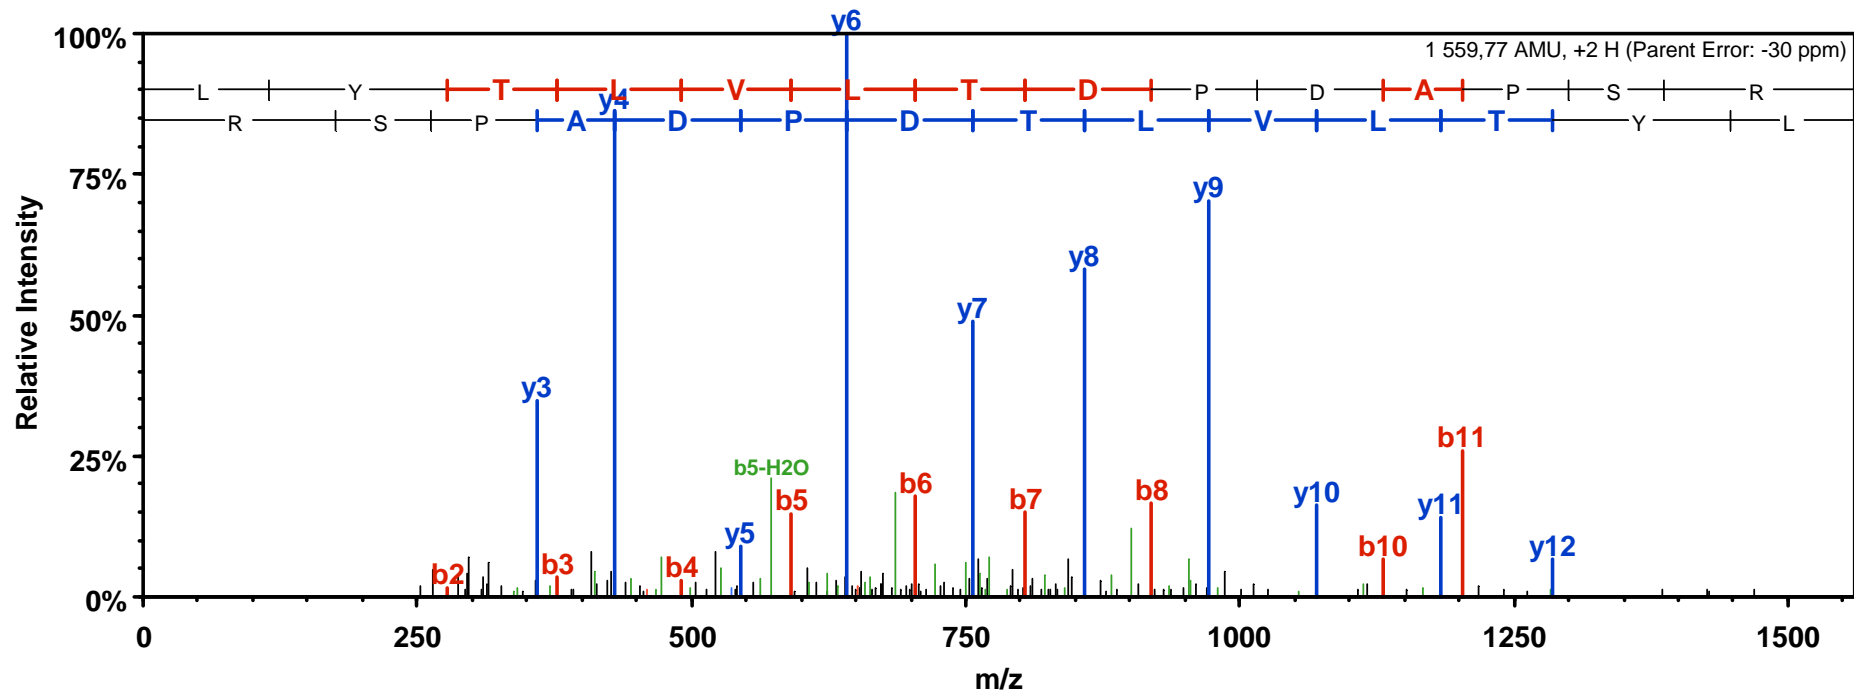

| Biological sample name | MS/MS sample name | Protein name                                                      | Peptide sequence | Mascot Ion score |
|------------------------|-------------------|-------------------------------------------------------------------|------------------|------------------|
| Castestatin_11         | F011563 (F013479) | Phosphatidylethanolamine-binding protein 1 - Homo sapiens (Human) | LYTLVLTDPDAPSR   | 83,3             |

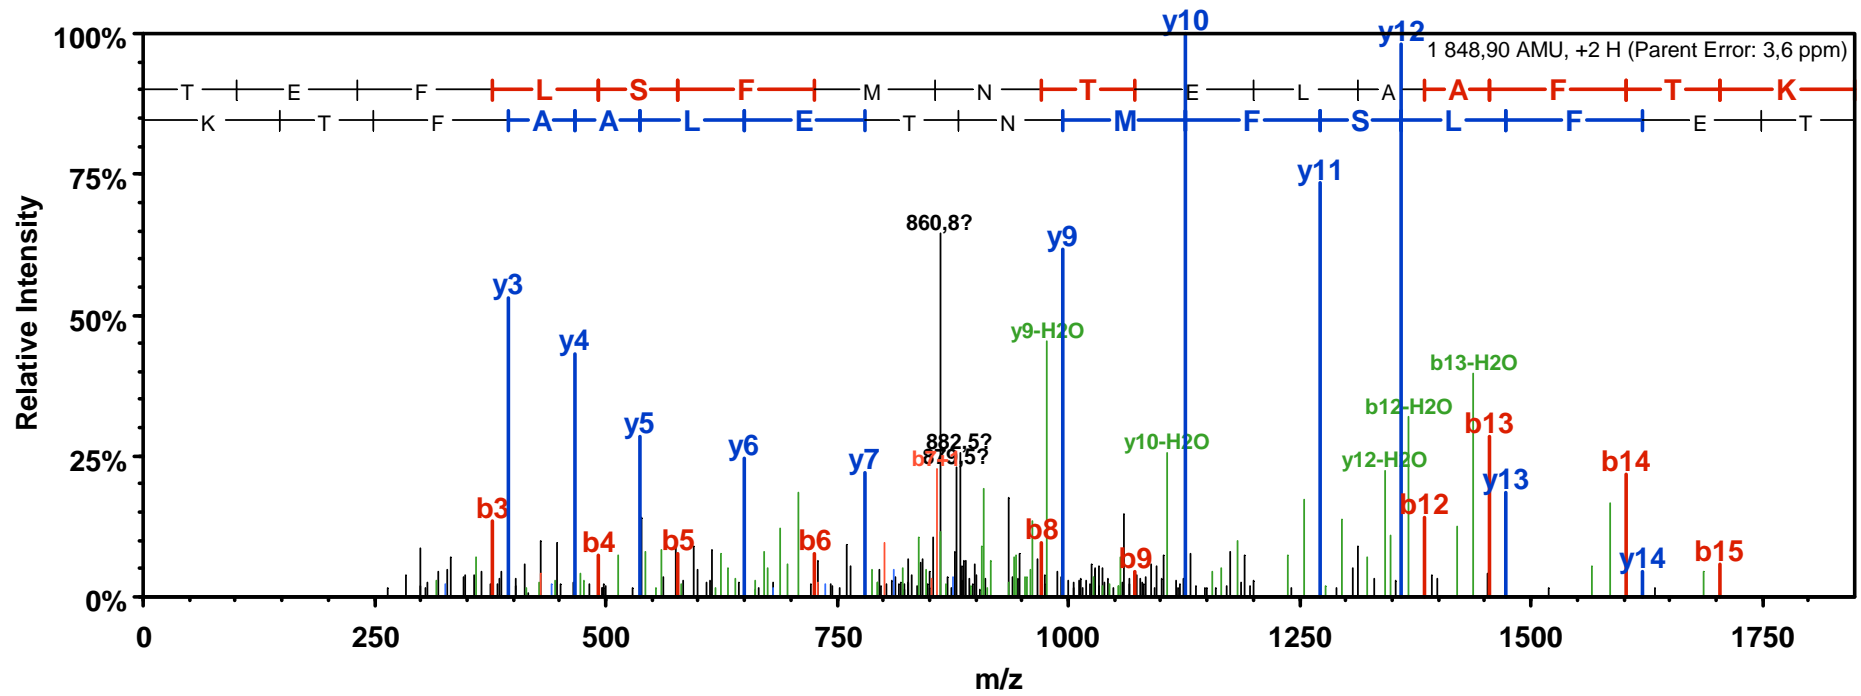

| Biological sample name | MS/MS sample name | Protein name                            | Peptide sequence | Mascot Ion score |
|------------------------|-------------------|-----------------------------------------|------------------|------------------|
| Castestatin_14         | F011566 (F013485) | Protein S100-A11 - Homo sapiens (Human) | TEFLSFMNTELAFTK  | 66,8             |



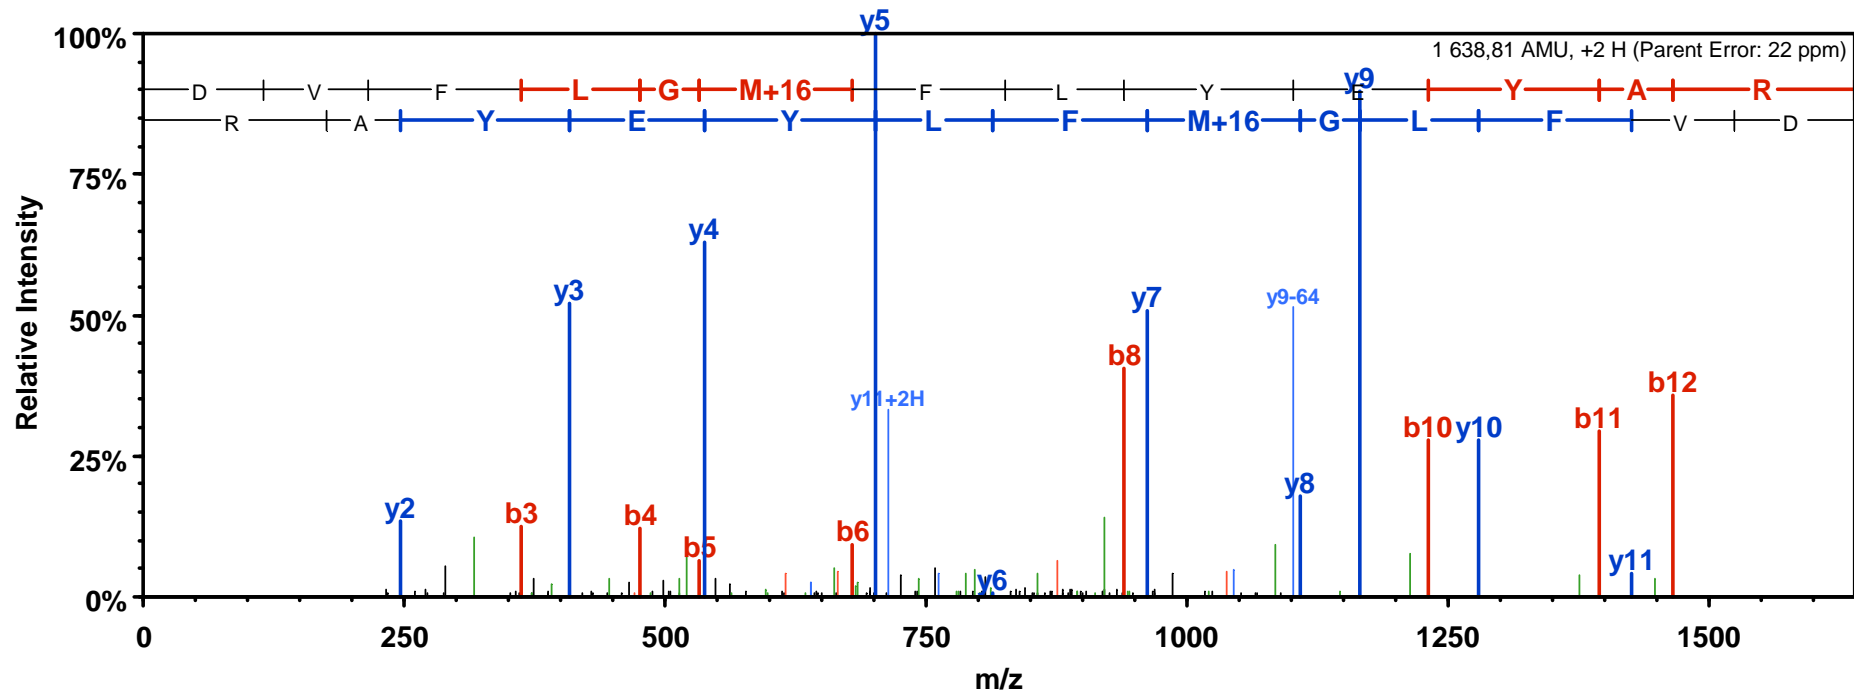

| Biological sample name | MS/MS sample name | Protein name                                   | Peptide sequence | Mascot Ion score |
|------------------------|-------------------|------------------------------------------------|------------------|------------------|
| Castestatin_13         | F011565 (F013483) | Serum albumin precursor - Homo sapiens (Human) | DVFLGMFLYEYAR    | 77,1             |

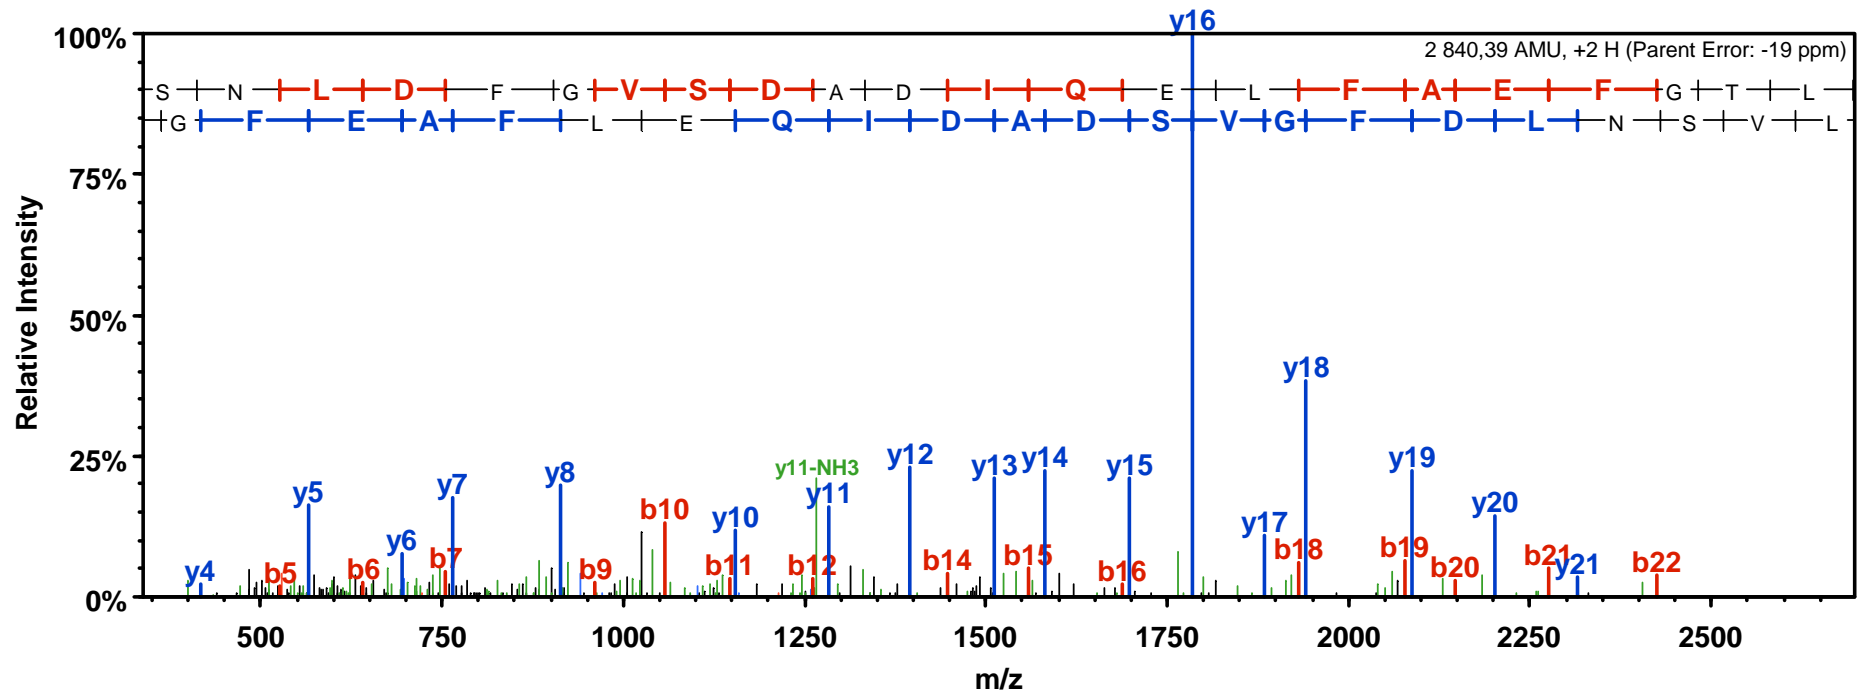

| Biological sample name | MS/MS sample name | Protein name                                 | Peptide sequence           | Mascot Ion score |
|------------------------|-------------------|----------------------------------------------|----------------------------|------------------|
| Castestatin_12         | F011564 (F013481) | THO complex subunit 4 - Homo sapiens (Human) | LLVSNLDFGVSDADIQELFAEFGTLK | 137              |

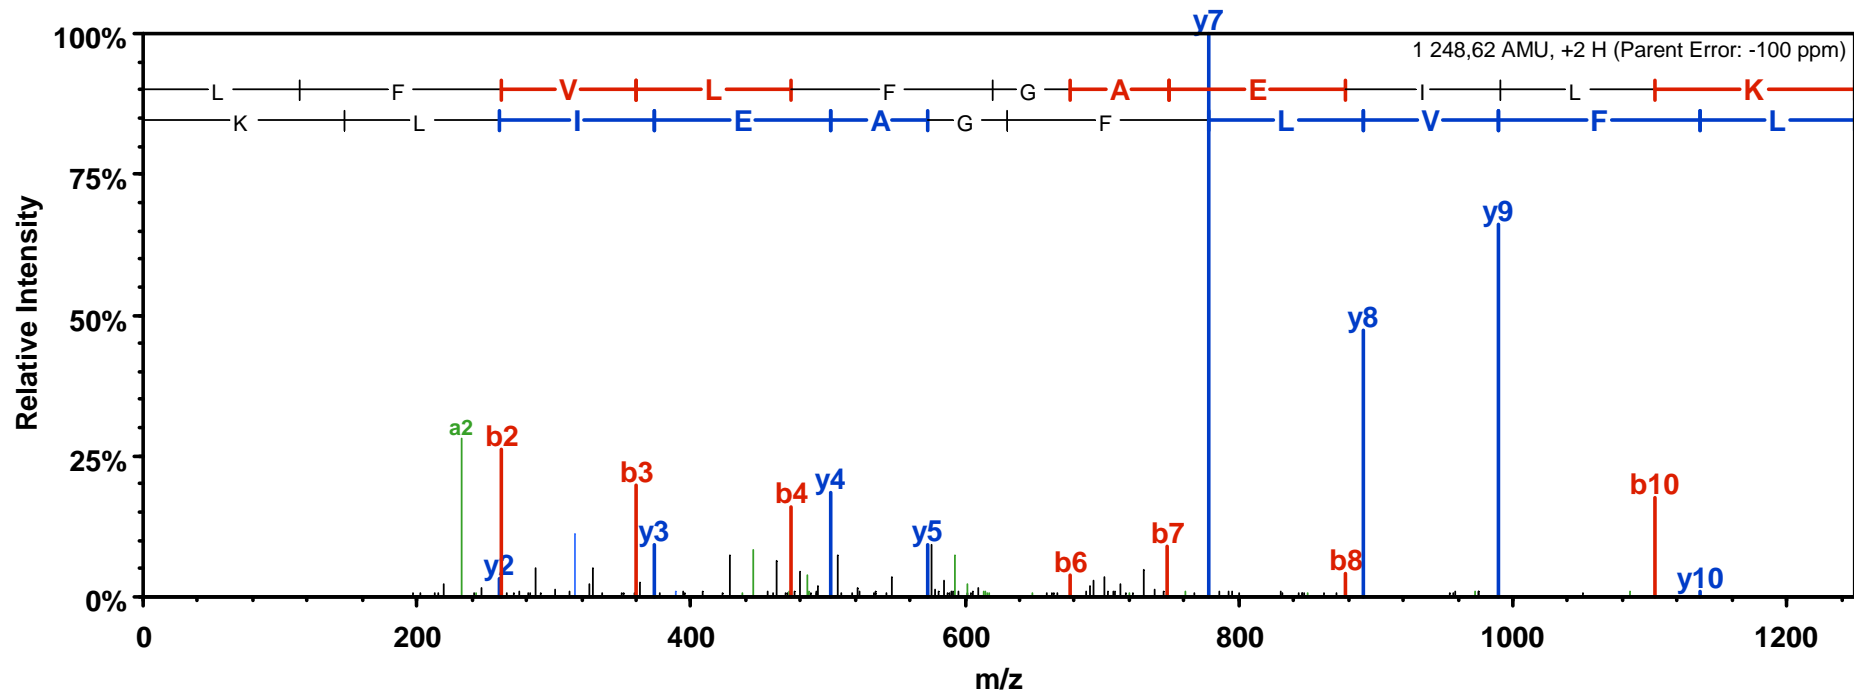

| Biological sample name | MS/MS sample name | Protein name                         | Peptide sequence | Mascot Ion score |
|------------------------|-------------------|--------------------------------------|------------------|------------------|
| Castestatin_16         | F011568 (F013490) | Transaldolase - Homo sapiens (Human) | LFVLFGAEILK      | 59,1             |

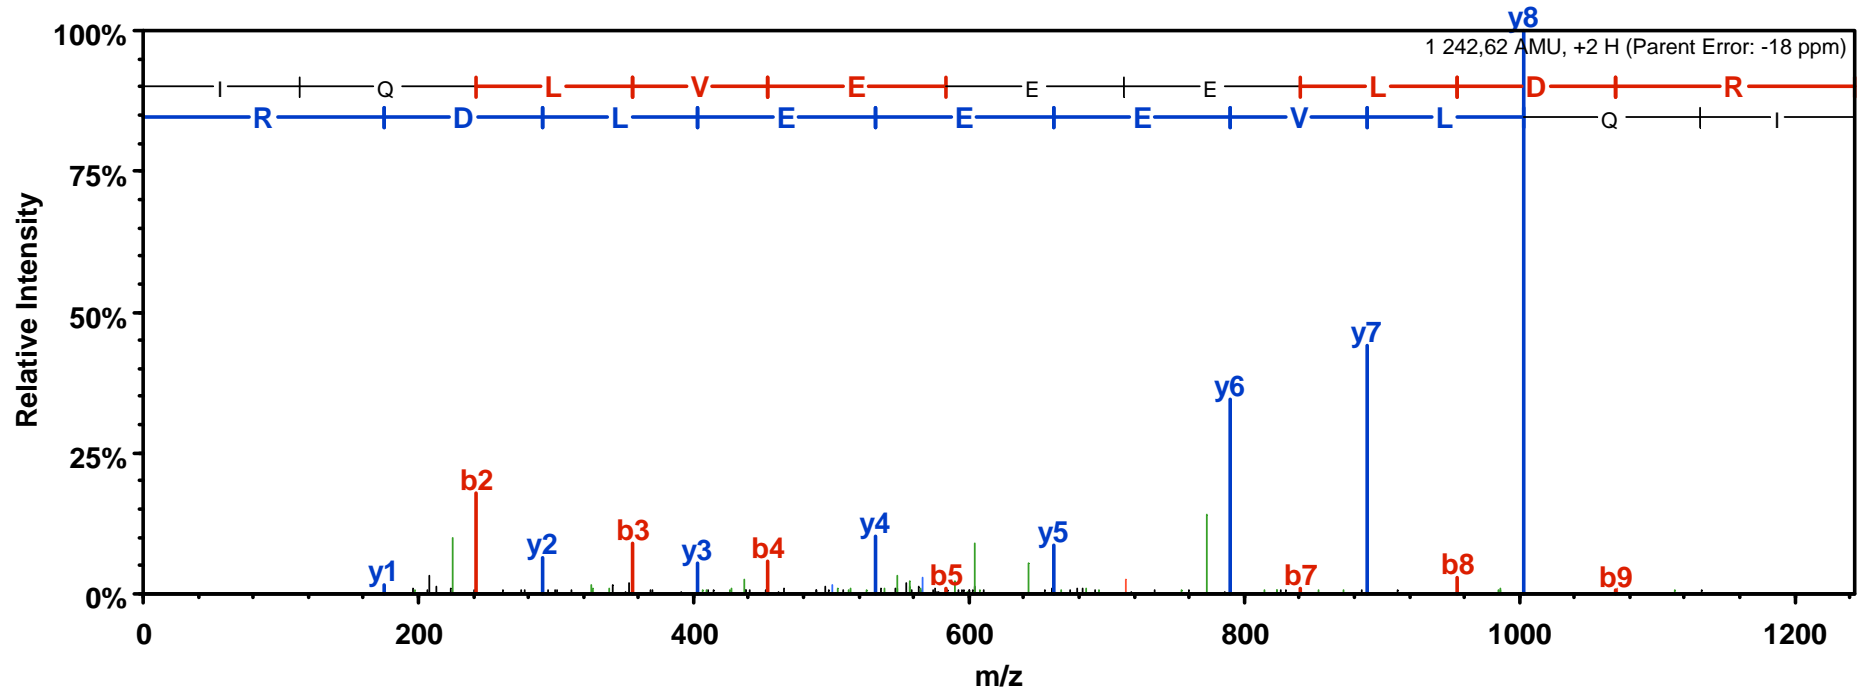

| Biological sample name | MS/MS sample name | Protein name                                     | Peptide sequence | Mascot Ion score |
|------------------------|-------------------|--------------------------------------------------|------------------|------------------|
| Castestatin_13         | F011565 (F013483) | Tropomyosin alpha-3 chain - Homo sapiens (Human) | IQLVEEELDR       | 60,2             |

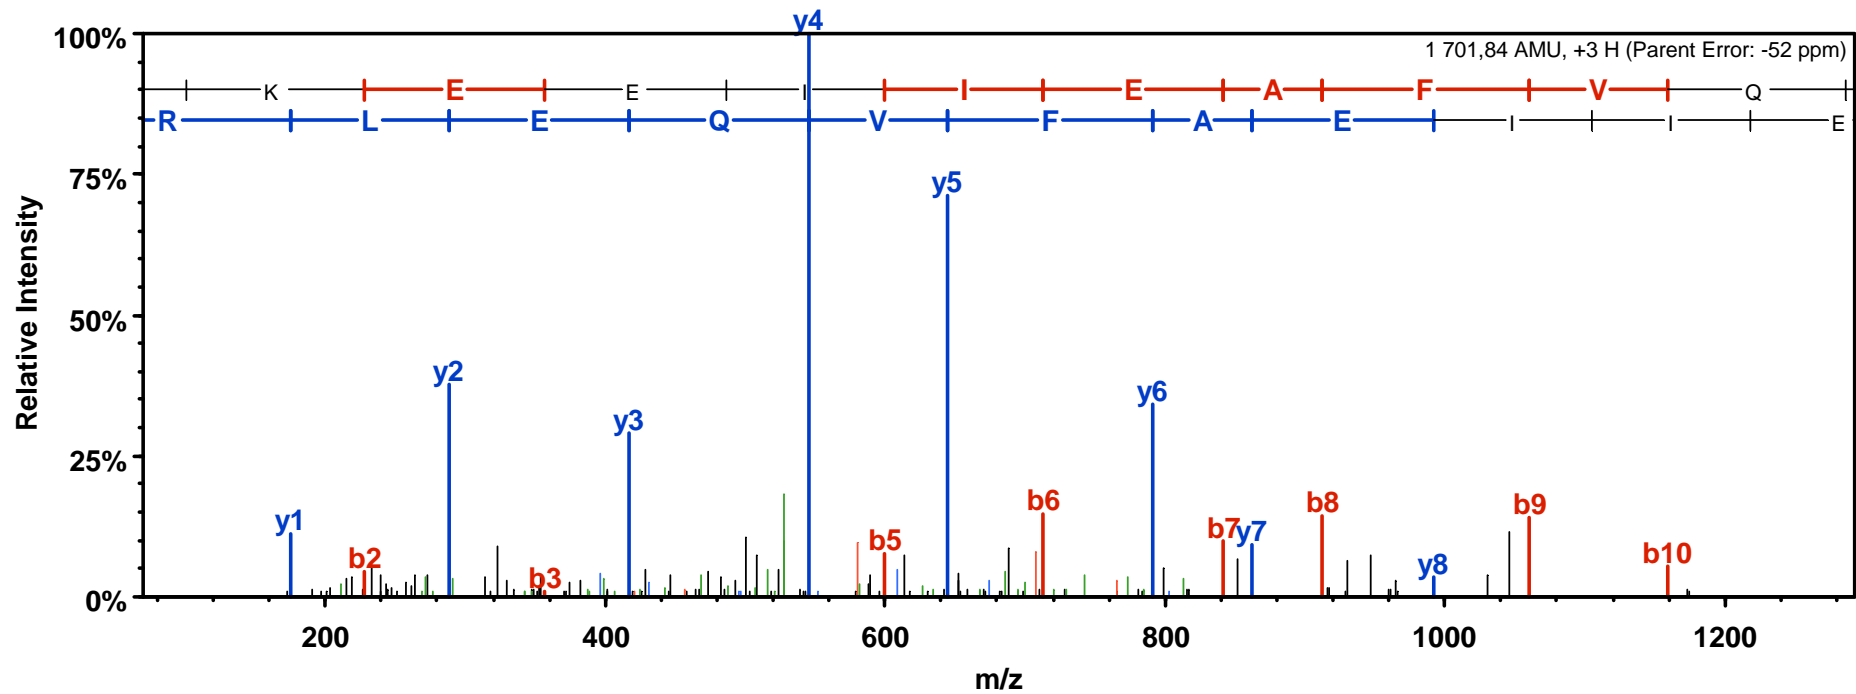

| Biological sample name | MS/MS sample name | Protein name                                                 | Peptide sequence | Mascot Ion score |
|------------------------|-------------------|--------------------------------------------------------------|------------------|------------------|
| Castestatin_14         | F011566 (F013485) | Vasodilator-stimulated phosphoprotein - Homo sapiens (Human) | VKEEIIIEAFVQELR  | 56,3             |

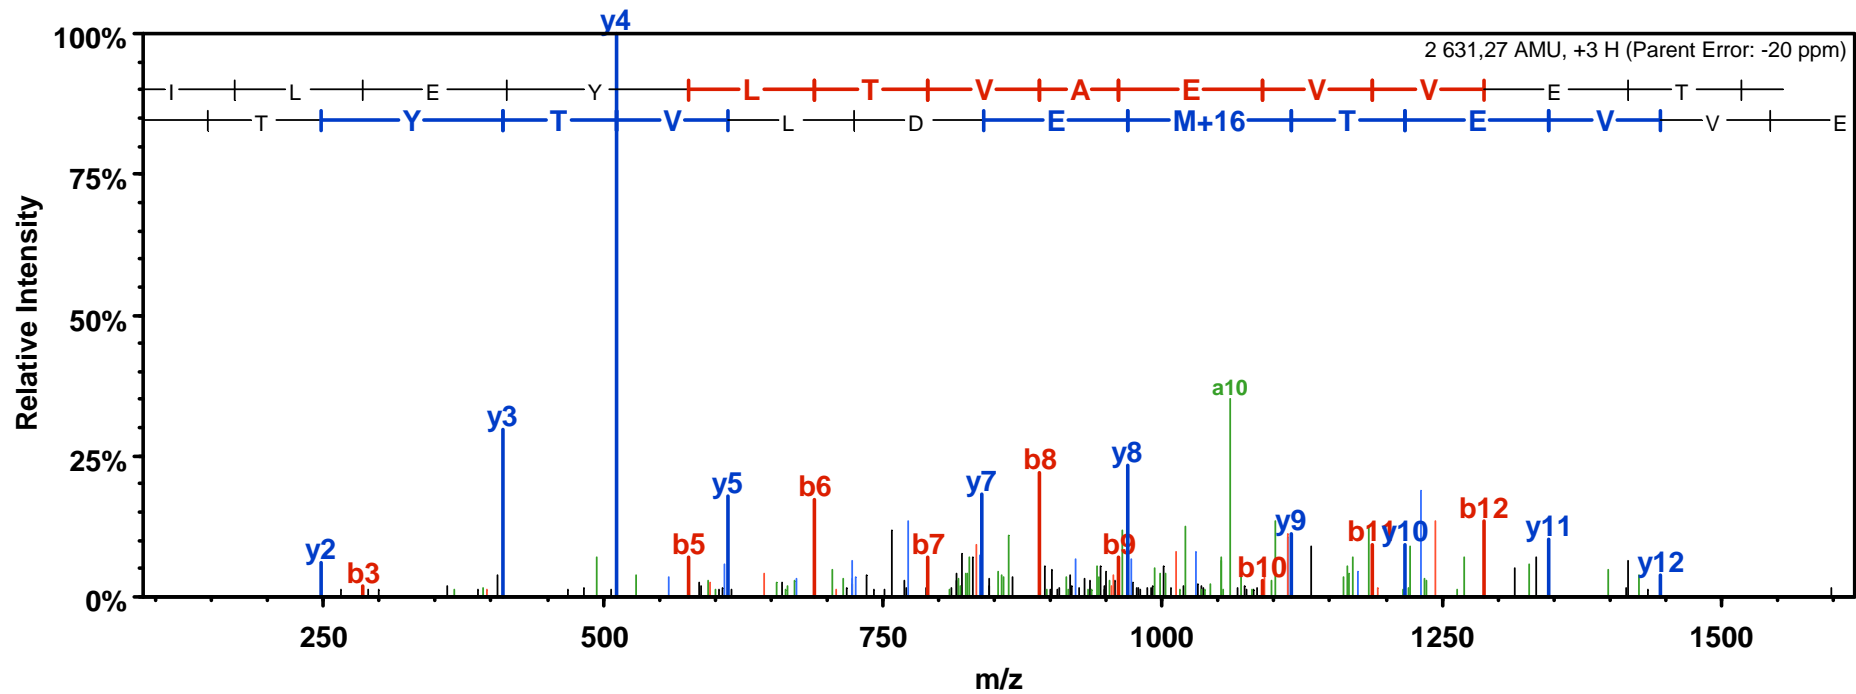

| Biological sample name | MS/MS sample name | Protein name                    | Peptide sequence         | Mascot Ion score |
|------------------------|-------------------|---------------------------------|--------------------------|------------------|
| Castestatin_16         | F011568 (F013490) | Vinculin - Homo sapiens (Human) | GILEYLTVAEYVETMEDLVITYTK | 61,9             |
